1 **Population size, HIV prevalence, and antiretroviral therapy coverage among key**  
2 **populations in sub-Saharan Africa: collation and synthesis of survey data 2010-2023**

3 Oliver Stevens MPH<sup>§1</sup>, Keith Sabin PhD<sup>2</sup>, Rebecca Anderson BSc<sup>1</sup>, Sonia Arias Garcia  
4 MSc<sup>2</sup>, Kalai Willis MSPH<sup>3</sup>, Amrita Rao PhD<sup>3</sup>, Anne F. McIntyre PhD<sup>4</sup>, Elizabeth Fearon  
5 PhD<sup>5</sup>, Emilie Grard MPH<sup>1</sup>, Alice Stuart-Brown MSc<sup>1</sup>, Prof Frances Cowan MD<sup>6,7</sup>, Prof  
6 Louisa Degenhardt PhD<sup>8</sup>, James Stannah MPH<sup>13</sup>, Jinkou Zhao PhD<sup>9</sup>, Avi J. Hakim  
7 PhD<sup>4</sup>, Katherine Rucinski PhD<sup>3</sup>, Isabel Sathane BSc<sup>10</sup>, Makini Boothe PhD<sup>11</sup>, Lydia  
8 Atuhaire PhD<sup>12</sup>, Prof Peter S. Nyasulu PhD<sup>12,13</sup>, Mathieu Maheu-Giroux ScD<sup>14</sup>, Prof  
9 Lucy Platt PhD<sup>15</sup>, Brian Rice PhD<sup>16</sup>, Wolfgang Hladik MD<sup>4</sup>, Prof Stefan Baral MD<sup>3</sup>, Mary  
10 Mahy ScD<sup>2</sup>, Jeffrey W. Imai-Eaton PhD<sup>1, 17</sup>

- 11 1. MRC Centre for Global Infectious Disease Analysis, School of Public Health,  
12 Imperial College London, London, United Kingdom  
13 2. Data for Impact, The Joint United Nations Program on HIV/AIDS (UNAIDS), Geneva,  
14 Switzerland  
15 3. Johns Hopkins Bloomberg School of Public Health, Baltimore, MD, USA  
16 4. US Centers for Disease Control and Prevention (CDC), Atlanta, USA  
17 5. Institute for Global Health, University College London, London, United Kingdom  
18 6. Liverpool School of Tropical Medicine, Liverpool, United Kingdom  
19 7. Centre for Sexual Health and HIV/AIDS Research, Zimbabwe  
20 8. National Drug & Alcohol Research Centre, University New South Wales, Sydney,  
21 Australia  
22 9. The Global Fund to Fight AIDS, Tuberculosis and Malaria, Geneva, Switzerland  
23 10. Ministry of Health, Maputo, Mozambique  
24 11. Data for Impact, The Joint United Nations Program on HIV/AIDS (UNAIDS), Maputo,  
25 Mozambique  
26 12. Division of Epidemiology & Biostatistics, Department of Global Health, Faculty of  
27 Medicine and Health Sciences, Stellenbosch University, Cape Town, South Africa  
28 13. Division of Epidemiology & Biostatistics, School of Public Health, Faculty of Health  
29 Sciences, University of the Witwatersrand, Johannesburg, South Africa  
30 14. Department of Epidemiology and Biostatistics, School of Population and Global  
31 Health, McGill University, Montréal, Canada  
32 15. Faculty of Public Health and Policy, London School of Hygiene and Tropical  
33 Medicine, London, United Kingdom

- 34 16. Sheffield Centre for Health and Related Research (SCHARR), School of Medicine  
35 and Population Health, University of Sheffield, United Kingdom  
36 17. Center for Communicable Disease Dynamics, Department of Epidemiology, Harvard  
37 T. H. Chan School of Public Health, Boston, MA, USA

38

39 § Correspondence to:

40 Oliver Stevens  
41 MRC Centre for Global Infectious Disease Analysis, School of Public Health, Imperial  
42 College London  
43 St. Mary's Hospital Campus  
44 Norfolk Place  
45 London  
46 W2 1PG  
47 United Kingdom  
48 [o.stevens@imperial.ac.uk](mailto:o.stevens@imperial.ac.uk)

49

50 Word count: 3790 / 3500

51 Abstract: 310 / 300

52 **Abstract**

53 **Background:** Key population HIV programmes in sub-Saharan Africa (SSA) require  
54 epidemiologic information to ensure equitable and universal access to effective  
55 services. We consolidated survey data among female sex workers (FSW), gay men and  
56 other men who have sex with men (MSM), people who inject drugs (PWID), and  
57 transgender people to estimate key population size, HIV prevalence, and antiretroviral  
58 therapy (ART) coverage for countries in mainland SSA.

59 **Methods:** Key population size estimates (KPSE), HIV prevalence, and ART coverage  
60 data from 39 SSA countries between 2010-2023 were collated from existing databases  
61 and verified against source documents. We used Bayesian mixed-effects spatial  
62 regression to model urban KPSE as a proportion of the gender/year/area-matched 15-  
63 49 years adult population. We modelled subnational key population HIV prevalence and  
64 ART coverage with age/gender/year/province-matched total population estimates as  
65 predictors.

66 **Findings:** We extracted 2065 key population size, 1183 HIV prevalence, and 259 ART  
67 coverage data points. Across national urban populations, a median of 1.65% of adult  
68 cisgender women were FSW (interquartile range [IQR]=1.35-1.91%), 0.89% of men  
69 were MSM (IQR=0.77-0.95%), 0.32% of men injected drugs (IQR=0.31-0.34%), and  
70 0.10% of women were transgender (IQR=0.06-0.12%). HIV prevalence among key  
71 populations was, on average, 4 to 6 times higher than matched total population  
72 prevalence, and ART coverage was correlated with, but lower than, total population  
73 ART coverage with wide heterogeneity in relative ART coverage across studies. Across

74 SSA, key populations were estimated as 1.2% (95% credible interval [CrI]: 0.9, 1.6) of  
75 the total population aged 15-49 years but 6.1% (95% CrI: 4.5, 8.2) of people living with  
76 HIV.

77 **Interpretation:** Key populations in SSA experience higher HIV prevalence and lower  
78 ART coverage, underscoring the need for focused prevention and treatment services. In  
79 2024, limited data availability and heterogeneity constrain precise estimates for  
80 programming and monitoring trends. Strengthening key population surveys and routine  
81 data within national HIV strategic information systems would support more precise  
82 estimates.

83 **Funding:** UNAIDS, BMGF, NIH

## 84 **Research in Context**

### 85 *Evidence before this study*

86 Key populations, including female sex workers (FSW), gay men and other men who  
87 have sex with men (MSM), people who inject drugs (PWID), and transgender people,  
88 are at higher risk of HIV infection, including in sub-Saharan Africa (SSA). Delivering  
89 appropriate HIV prevention and treatment services for key populations and monitoring  
90 an equitable HIV response requires robust information on key population size, HIV  
91 prevalence, the treatment cascade, and new HIV infections. For this reason, key  
92 population surveys, including population size estimation and bio-behavioural surveys,  
93 are a standard component of comprehensive national HIV surveillance.

94 Several complementary ongoing initiatives consolidate HIV data on key populations to  
95 support programme planning and implementation, global advocacy, and research.  
96 These include the Key Population Atlas and Global AIDS Monitoring (Joint United  
97 Nations Programme on HIV/AIDS [UNAIDS]), databases maintained by the US Centers  
98 for Disease Control and Prevention (CDC) and The Global Fund to Fight AIDS,  
99 Tuberculosis and Malaria (The Global Fund), and the Global.HIV initiative (Johns  
100 Hopkins University). These include similar data sources, but vary in scope, inclusion  
101 criteria, data elements recorded, and linkage to and validation against primary source  
102 reports. Incomplete recording of key methodological details limits appraisal and formal  
103 evidence synthesis, and therefore utility of data for strategic planning.

104 Many other research studies have systematically reviewed, analysed, and extrapolated  
105 key population survey data in sub-Saharan Africa in single countries or across multiple

106 countries. These studies have tended to focus on specific outcomes or population  
107 groups of interest, and primarily comprise an appraisal of peer-reviewed literature.

108 *Added value of this study*

109 We consolidated and deduplicated data collected between 2010-2023 from existing key  
110 population survey databases maintained by the UNAIDS Key Population Atlas, UNAIDS  
111 Global AIDS Monitoring, US CDC, and the Global Fund. We obtained published and  
112 grey literature surveillance reports from the Johns Hopkins University Global.HIV  
113 repository, additional web-based searches, and engagement with country HIV strategic  
114 information teams, and validated each observation of key population size, HIV  
115 prevalence, or ART coverage against primary surveillance reports. We used regression  
116 to characterise the relationship between key population and total population HIV  
117 indicators and extrapolated key population size estimates (KPSE), HIV prevalence, and  
118 ART coverage data to national-level estimates for all countries in mainland SSA.

119 This exercise was the most comprehensive effort to date to consolidate key population  
120 HIV data in SSA. We analysed over 3000 observations from 126 KPSE, 217 HIV  
121 prevalence, and 62 ART coverage studies. We estimated that across urban populations  
122 aged 15-49 years in SSA countries, a median of 1.65% of cisgender women were FSW;  
123 0.89% of men have sex with men; 0.32% of men injected drugs; and 0.10% of women  
124 were transgender. This translated to 3.7 million FSW, 1.9 million MSM, 770,000 PWID,  
125 and 230,000 transgender women (TGW) in SSA who require comprehensive HIV  
126 prevention or treatment services. FSW, MSM, PWID, and TGW together were estimated  
127 as 1.2% of the population aged 15-49 years, but comprised 6.1% of people living with

128 HIV. ART coverage among members of key populations living with HIV increased with  
129 total population ART coverage, but was lower for all key populations. We identified large  
130 gaps in data availability. Of the four key populations and three indicators studied, only  
131 Mozambique had data for all twelve indicators. Data were particularly sparse for  
132 transgender populations and PWID.

133 *Implications of all the available evidence*

134 Key populations experience higher HIV prevalence and lower ART coverage across all  
135 settings in sub-Saharan Africa than the total population. Extrapolated national estimates  
136 provide a foundation for planning appropriate key population-focused services for HIV  
137 prevention and treatment in all settings, including those with no or limited data.

138 However, large data availability gaps driven by discriminatory practices and punitive  
139 policies against key populations, inconsistency of existing data, and consequent wide  
140 uncertainty ranges around estimates limit the ability of existing data to guide granular  
141 programmatic planning and target setting for key population services and to monitor  
142 trends. More consistent surveillance implementation and improved routine surveillance  
143 through HIV prevention and treatment programmes for key populations would support  
144 monitoring equitable and equal programme access, as outlined in the Global AIDS  
145 Strategy 2021-2026 developed by UNAIDS, its co-sponsors, and other partners to end  
146 HIV/AIDS as a public health threat by 2030.

## 147 **Introduction**

148 Key populations, including female sex workers (FSW), gay men and other men who  
149 have sex with men (MSM), people who inject drugs (PWID), and transgender people,  
150 experience higher risk of acquiring and transmitting HIV due to a combination of  
151 biological and sociostructural factors, including stigma and criminalisation.<sup>1-3</sup> The Global  
152 AIDS Strategy 2021-2026 calls for “equitable and equal access” to HIV prevention and  
153 treatment to reduce HIV incidence and end HIV/AIDS as a public health threat by 2030.<sup>4</sup>  
154 Delivering evidence-based HIV services for key populations and monitoring attainment  
155 of an equitable HIV response requires robust epidemiologic and service engagement  
156 indicators, including key population size, HIV prevalence and incidence, treatment and  
157 prevention cascades.

158 Key population survey data are sparse and less representative of their target population  
159 than common general population sampling approaches such as national household  
160 surveys or sentinel surveillance. Key population surveys often rely on respondent-driven  
161 and venue-based sampling methods<sup>5,6</sup> which require strong assumptions to interpret as  
162 population-representative. Household survey sampling frames are inappropriate for  
163 reaching populations that are mobile and unlikely to disclose risk behaviour due to  
164 societal marginalisation and discrimination.<sup>7-9</sup> Key population surveys are often  
165 infrequent and commonly restricted to, or disproportionately conducted in, urban areas.

166 Systematic reviews and meta-analyses of population size, HIV prevalence, or  
167 antiretroviral therapy (ART) coverage encompassing sub-Saharan Africa (SSA) have  
168 been conducted for FSW,<sup>10,11</sup> MSM,<sup>12,13</sup> PWID,<sup>14,15</sup> and transgender women (TGW).<sup>16,17</sup>



169 Several independent initiatives have been undertaken to consolidate key population  
170 surveillance data.<sup>18–21</sup> These efforts aim to monitor the state of the epidemic, evaluate  
171 programmes, and make recommendations on key population data reporting and quality  
172 thresholds.

173 We consolidated and harmonised key population size estimates (KPSE), HIV  
174 prevalence, and ART coverage data from existing databases and described data  
175 availability across countries and over time for each key population. We characterised  
176 the relationship between key population and total population HIV indicators and  
177 extrapolated KPSE, HIV prevalence, and ART coverage data to national-level estimates  
178 for mainland countries in SSA.

## 179 **Methods**

### 180 *Data sources and extraction*

181 We consolidated data from studies conducted 2010–2023 from four existing databases  
182 and two systematic reviews among FSW, MSM, PWID, and transgender people.<sup>13,22</sup>  
183 Data among incarcerated people were not included as part of this review. The existing  
184 databases were the Joint United Nations Programme on HIV/AIDS (UNAIDS) Global  
185 AIDS Monitoring submissions,<sup>23</sup> UNAIDS Key Population Atlas,<sup>24</sup> the Global Fund to  
186 Fight AIDS, Tuberculosis and Malaria (the Global Fund) surveillance database, and a  
187 dataset maintained by the US Centers for Disease Control and Prevention (CDC)  
188 Division of Global HIV & TB Key Population Surveillance Team (Supplementary Table  
189 S1). For each observation, we extracted information about the study methodology,  
190 study location (country, subnational location), study population gender and age group,

191 central estimate, sample size, standard error, and primary source or reference (e.g.,  
192 survey report) (Supplementary Table S2).

193 Source documents were compiled from archives accompanying each database, the  
194 Johns Hopkins University Global.HIV document repository,<sup>25</sup> Medline, and Google  
195 Scholar, following which we contacted UNAIDS Strategic Information advisors and other  
196 HIV programme contacts in each country to seek missing reports. Four authors (OS,  
197 RA, EG, AS-B) reviewed source documents to deduplicate observations recorded in  
198 multiple databases, validate against sources, and extract missing data elements. During  
199 source review, we added observations when additional relevant data were reported, or  
200 additional sources were ascertained that were not in the initial databases.

201 Observations were excluded if: key population definition, year, or study area were  
202 missing; the study area was non-specific (e.g., 'urban areas' or '5 provinces'); estimates  
203 were modelled or extrapolated; or data could not be confirmed by primary source  
204 review. There were no age group eligibility criteria for inclusion in analysis. Studies  
205 were not excluded or differentiated in our analysis according to study-specific population  
206 group definitions based on engaging in risk behaviours or time periods (e.g. sold sex in  
207 the last 6 months versus last 12 months; Supplementary Text S1). Transgender men  
208 (TGM) were not analysed or reported here due to insufficient data, but available  
209 observations are included in supplementary datasets  
210 (<https://zenodo.org/records/10838438>).

211 *Data processing*

212 To compare population sizes across settings, KPSE reported as counts were converted  
213 to population proportions. Each KPSE was matched to the total population  
214 denominator<sup>26–28</sup> by age, gender, year, and area, and assigned to one of seven method  
215 categories<sup>29</sup> (Supplementary Text S2). Age information was missing from nearly all key  
216 population reports; missing age ranges were assigned as age 15-49 years. Unless  
217 gender was specified, PWID were assumed to be men as 90% of people who inject  
218 drugs in sub-Saharan Africa are men.<sup>22</sup> Surveys among transgender people which did  
219 not report gender were assumed to be among transgender women because  
220 respondents often reported high prevalence of male partners and receptive anal  
221 intercourse, and surveys among TGM in SSA remain rare.<sup>17</sup>

222 Key population HIV prevalence and ART coverage observations were compared to total  
223 population HIV prevalence or ART coverage, respectively, matched by age, gender,  
224 year, and first administrative level (henceforth ‘province’). Provincial age/gender-specific  
225 HIV prevalence and ART coverage were extracted from UNAIDS Naomi subnational  
226 estimates for 2022 and projected backwards 2000-2021 parallel to national HIV  
227 prevalence and ART coverage trajectories among adults 15-49 years.<sup>30</sup> Only  
228 serologically-determined HIV prevalence observations were included in analysis.

229 Key population ART coverage observations derived from populations with self-reported  
230 HIV-positive status or clinic-based recruitment were excluded. ART usage was  
231 determined through either self-report or laboratory methods via antiretroviral (ARV)  
232 metabolite biomarker or viral load (VL) testing. Viral load suppression (VLS)

233 observations were standardised using a reporting threshold of 1000 copies/ml.<sup>31</sup> In  
234 cases where surveys measured both ARV biomarker and VL, ARV biomarker was used.  
235 VLS observations were converted to estimates of ART coverage assuming a logit  
236 difference of -0.32, the average difference from studies that measured both viral load  
237 and metabolite-confirmed ARV status (Supplementary Text S3).

### 238 *Analysis*

239 We used Bayesian mixed-effects linear regression to model logit-transformed KPSE  
240 proportions among the urban total population aged 15-49 years at provincial level.  
241 Separate regressions were estimated for each key population. The model included  
242 effects for study method, spatially-correlated random effects between neighbouring  
243 countries and provinces, and a study-level random effect allowing correlation among  
244 KPSE proportions from the same study. Study method was classified as: (1) non-  
245 mapping-based empirical methods that estimated total key population size, or (2)  
246 Priorities for Local AIDS Control Efforts (PLACE) or mapped estimates which counted  
247 venue- or hotspot-attending population size (see Supplementary Text S2 for details).  
248 Within these, method-specific random effects were included to permit empirical  
249 deviations from the central estimate. National KPSE counts were extrapolated using  
250 urban KPSE proportions, the proportion of the population living in urban areas,<sup>32</sup> and  
251 the assumed rural-to-urban ratio of key population size. Qualitative data indicate that  
252 KPSE proportions are higher in urban areas than rural areas, but no empirical data were  
253 available to quantify the rural-to-urban ratio.<sup>33-35</sup> To reflect wide uncertainty in the rural-  
254 to-urban ratio, we assumed that rural KPSE proportions were, on average, 40% lower

255 than in urban areas, but with a wide range such that 80% of the time the true value will  
256 be between 20% and 60% lower.

257 For HIV prevalence, we modelled the relationship between logit-transformed key  
258 population HIV prevalence and logit total population HIV prevalence (age 15-49 years).  
259 FSW and PWID were modelled separately. Due to limited data, MSM and TGW were  
260 modelled together, but with a population type fixed effect reflecting empirical prevalence  
261 difference between TGW and MSM.<sup>17</sup> We modelled survey HIV prevalence  
262 observations with a beta-binomial distribution to allow for overdispersion, accounting for  
263 additional variation between populations and study designs. The model included fixed  
264 effects for logit population prevalence interacted with region (Eastern and Southern  
265 Africa [ESA] or Western and Central Africa [WCA]) and province-, country-, and study-  
266 level random effects. Country- and province-level random effects were spatially  
267 correlated.

268 Primary analysis for key population ART coverage, was restricted to diagnostically-  
269 determined ART usage (either via ARV biomarker or VL testing). Logit-transformed key  
270 population ART coverage was modelled as a function of logit total population ART  
271 coverage in the same year, age group, and province. All key populations were modelled  
272 together with random slopes for each key population to enable sharing of information  
273 about the overall relationship for groups with very limited data. The observed number on  
274 ART was modelled with a beta-binomial distribution with fixed effects for logit population  
275 ART coverage, spatially correlated country- and province-level random effects, and  
276 study-level random effects.

277 We conducted sensitivity analyses in which self-reported ART coverage data were also  
278 included. For all three models (KPSE, prevalence, ART coverage) in sensitivity analysis  
279 we used ages 15-29 years as the matched total population denominator for MSM and  
280 TGW regression analyses, and 15-39 years for FSW, reflecting the younger median age  
281 of survey respondents.<sup>36,3736-38</sup>

282 We combined national KPSE, HIV prevalence, and ART coverage estimates to  
283 calculate the number of KPLHIV and on ART. Ninety-five percent credible intervals were  
284 generated by combining 1000 posterior samples for each outcome. We calculated 1000  
285 regional median KPSE differences from each of the posterior samples of national KPSE  
286 proportions, and calculated 95% credible intervals by combining the 1000 regional  
287 median differences. KPLHIV estimates were divided by estimates of the total PLHIV  
288 aged 15-49 years from 2022 national UNAIDS estimates to calculate the proportion of  
289 all PLHIV associated with each key population.<sup>39</sup>

290 Data were extracted, deduplicated, and validated in Microsoft Excel. Statistical analyses  
291 were conducted in R version 4.2.0 using the R-INLA package (v23.4.24). Further  
292 statistical methods details are in Supplementary Text S4. The GATHER reporting  
293 checklist<sup>40</sup> is in Supplementary Table S17.

#### 294 *Ethics statement*

295 This study received ethical approval from the Imperial College Research Integrity and  
296 Governance Team (ICREC #6412027). Regulatory bodies providing ethical approvals or  
297 other ethics considerations for included studies are reported in Supplementary File S3.

298 *Role of the funding source*

299 Authors KS, SA-G, MB, and MM are employees of UNAIDS and contributed to the  
300 conceptualisation of the study, interpretation of results, and editing the manuscript. OS,  
301 RA, and JWI-E had access to all data included in the study. OS and JWI-E accepted  
302 responsibility to submit for publication.

303 **Results**

304 4542 KPSE conducted between 2010 to 2023 were compiled (Figure 1). Following data  
305 cleaning, source document review, and area matching, 2065 observations were  
306 extracted from 126 studies (Table 1; Supplementary Figure S1). Data were most  
307 available for FSW (n=972, data from 35/39 countries; Supplementary Table S3),  
308 followed by MSM (n=647, 33/39 countries), PWID (n=329, 23/39 countries), TGW  
309 (n=117, 13/39 countries), and TGM (n=16, 2/39 countries). Sixty-nine percent (445/647)  
310 of urban MSM population proportion observations were below 1% of the male adult (15-  
311 49 years) population (Supplementary Figure S2).

312 We identified 2732 key population HIV prevalence estimates, from which 1183 were  
313 extracted from 217 studies after processing. Denominators were reported for 98%  
314 (1154/1183) of observations. Most data were available for FSW (n=559, 36/39  
315 countries), followed by MSM (n=370, 34/39 countries), PWID (n=159, 21/39 countries),  
316 TGW (n=95, 23/39 countries), and TGM (n=5, 5/39 countries).

317 For ART coverage, 621 observations were identified. After processing, 259  
318 observations were extracted from 62 studies. Denominators were available for 98%  
319 (254/259). Data were most available for FSW (n=135, 27/39 countries), followed by

320 MSM (n=92, 24/39), TGW (n=17, 10/39 countries), and PWID (n=15, 8/39 countries).

321 No data were available for TGM. Fifty-nine percent of observations were VLS [152/259],

322 9% ART metabolite testing [24/259], and 32% self-reported ART usage [83/259].

323 We estimated that, across countries, a median 1.65% of urban cisgender women aged

324 15-49 years were FSW (interquartile range [IQR] 1.35-1.91), 0.89% of men had sex with

325 men (IQR 0.77-0.95), 0.32% of men injected drugs (IQR 0.31-0.34), and 0.10% of

326 women were transgender (IQR 0.06-0.12; Figure 2). Incorporating the rural-to-urban

327 ratio, median proportions of national total populations were 1.19% FSW, 0.66% MSM,

328 0.25% PWID, and 0.08% TGW. In sensitivity analysis using age 15-29 years as a

329 denominator for MSM PSEs and 15-39 years for FSW PSEs, median urban proportions

330 for MSM were 1.36% (IQR 1.15-1.42) and for FSW were 1.82% (IQR 1.60-2.13)

331 (Supplementary Figure S3).

332 Urban KPSE proportions were higher in ESA than WCA among FSW (median

333 difference +0.3%; 95% credible interval [CrI] -0.3, 1.0) and MSM (+0.2%; 95%CrI -0.2,

334 0.5) but uncertainty ranges contained zero. Proportions were similar between regions

335 among PWID and TGW, but KPSE data were sparse overall. PSE proportions derived

336 from PLACE and mapping studies were significantly lower than those derived from other

337 methods among FSW (odds ratio 0.58; 95%CrI 0.40, 0.83), MSM (0.26; 95%CrI 0.17,

338 0.41), and PWID (0.31; 95%CrI 0.19, 0.53), and lower among TGW (0.27; 95%CrI 0.07,

339 1.11) but for TGW the 95% credible interval contained 1 (Supplementary Table S4;

340 Supplementary Figure S4; Supplementary Tables S9-S12).



341 Observed HIV prevalence among key populations was consistently higher than area-  
342 matched total population HIV prevalence. Logit key population HIV prevalence in ESA  
343 was more strongly correlated with matched logit total population HIV prevalence than in  
344 WCA (Figure 3). In ESA, 15% population prevalence corresponded to 53% (95%CrI 45,  
345 62) HIV prevalence among FSW, 21% (95%CrI 12, 31) among MSM, 28% (95%CrI 15,  
346 45) among PWID, and 22% (95%CrI 14, 34) among TGW. In WCA, relative patterns  
347 were similar, but key population HIV prevalence varied less with total population HIV  
348 prevalence than in ESA. HIV prevalence differentials between key population and total  
349 population were larger when population prevalence was lower (Figure 3C).

350 Supplementary Table S5-S7 report regression results, Supplementary Table S13  
351 reports country-specific estimates, and Supplementary Figure S5 reports sensitivity  
352 analysis of imputed tested denominators.

353 ART coverage among FSW, MSM, PWID, and TGW was correlated with gender-  
354 matched population ART coverage, but with wide heterogeneity in relative ART  
355 coverage across studies (Figure 4). At 80% population coverage, predicted ART  
356 coverage among FSW was 11% lower (95%CrI 19, 4%), 19% lower (30, 10%) among  
357 MSM, 25% lower (41, 11%) among PWID, 13% lower (43, 18%) among TGW.

358 Supplementary Table S8 reports regression results and S14 reports country-specific  
359 estimates.

360 In sensitivity analysis including a fixed effect for ART measurement method, self-  
361 reported ART coverage was lower than lab-determined ART, but with wide 95% credible  
362 interval spanning no difference (odds ratio 0.73, 95%CrI 0.47, 1.15; Supplementary

363 Figure S6, Table S8). Assuming MSM surveys represented MSM aged 15-29 years or  
364 FSW surveys represented FSW aged 15-39 years minimally affected on HIV prevalence  
365 or ART coverage estimates (Supplementary Table S16).

366 Across SSA, FSW, MSM, PWID, and TGW combined were 1.2% (95%CrI 0.9, 1.6) of  
367 the population aged 15-49 years (3.7m FSW, 1.9m MSM, 770,000 PWID, and 230,000  
368 TGW), but 6.1% (95%CrI 4.5, 8.2) of PLHIV aged 15-49 years. In ESA this was 4.9%  
369 (95%CrI 3.4, 6.9) of PLHIV compared to 1.3% (95%CrI 0.9, 1.8) of the population and,  
370 in WCA, 11.7% (95%CrI 8.3, 16.5) of PLHIV compared to 1.2% (95%CrI 0.9, 1.7) of the  
371 population. FSW were 4.0% (95%CrI 2.7, 5.7) of PLHIV in SSA (750,000 PLHIV;  
372 95%CrI 520,000, 1,100,000), MSM were 1.4% (95%CrI 0.9, 2.0) or 250,000 PLHIV  
373 (95%CrI 170,000, 380,000), PWID were 0.5% (95%CrI 0.3, 0.8) or 89,000 PLHIV  
374 (95%CrI 50,000, 150,000), and TGW were 0.2% (95%CrI 0.1, 0.5) or 44,000 PLHIV  
375 (95%CrI 20,000, 100,000) (Figure 5).

## 376 Discussion

377 Data from 273 key population surveys provided consistent evidence across sub-  
378 Saharan Africa of higher HIV prevalence and lower ART coverage among key  
379 populations. We estimated there are 3.7 million FSW, 1.9 million MSM, 770,000 PWID,  
380 and 230,000 TGW in SSA who require comprehensive HIV prevention or treatment  
381 services. HIV prevalence was estimated to be 21% among FSW, 14% among MSM,  
382 11% among PWID, and 20% among TGW. These were 4.6, 5.9, 4.6, and 4.4 times  
383 higher than adult population prevalence, respectively, with larger relative differences  
384 when population prevalence was lower. Together, key populations constituted 1.2% of

385 the adult population in SSA but 6.1% of PLHIV. ART coverage among key populations  
386 increased with total population coverage, but lagged behind at high population ART  
387 coverage levels. However, there was wide uncertainty about estimates aggregated  
388 within countries and across SSA.

389 This exercise highlighted major data gaps and challenges interpreting existing data.  
390 Across the twelve combinations of three indicators and four key populations analysed  
391 here, on average countries had data for seven combinations (Supplementary Table S3).  
392 Data gaps are larger when restricting to the highest quality and most recent data. These  
393 gaps impede planning for equitable and universal access to HIV services and will  
394 persist without firm commitments to collect key population survey data. Implementation  
395 of high-quality surveys will also require addressing entrenched discriminatory practices  
396 and punitive laws and policies against key populations<sup>3,41–43</sup> In settings lacking or with  
397 limited data, our extrapolated estimates can be a foundation with which to guide future  
398 surveillance priorities, stimulate in-country data review and use, and estimate HIV  
399 epidemic indicators. Future efforts should especially focus on strengthening surveillance  
400 for MSM, PWID, and transgender people, and supporting use of HIV service delivery  
401 data for all key populations, while ensuring the safety and protection of marginalised  
402 individuals and their communities.<sup>3</sup>

403 Previous key population reviews and meta-analyses<sup>11,44–46</sup> relied on systematic  
404 searches of peer-reviewed literature. Our initial sources were existing databases,  
405 primarily populated by surveillance teams in each country or implementing  
406 organisations. This resulted in including a larger grey literature body, such as survey

407 reports, which are infrequently indexed by peer-reviewed databases.<sup>47</sup> However, many  
408 observations from initial databases could not be validated in source documents and  
409 were excluded from analysis, which in some countries excluded the only reported data.  
410 Demand for total population HIV estimates in SSA has promoted high-quality  
411 comparable surveillance methods, documentation, and dissemination. Review of key  
412 population data by national HIV surveillance teams was introduced into the UNAIDS  
413 sub-Saharan African estimates process in 2022, providing context for existing surveys,  
414 identifying missing sources and adding new data. This, alongside ongoing key  
415 population data initiatives and concerted advocacy efforts that ensure public  
416 dissemination, will improve the foundation for HIV surveillance among key populations  
417 and promote parity for key populations within national HIV data and strategic  
418 information.

419 Systematically collated data on key population size, HIV prevalence, and ART coverage  
420 are critical inputs for mathematical modelling analyses that guide optimal HIV resource  
421 allocation. Such studies consistently demonstrate that fully meeting the HIV prevention  
422 and treatment needs of key populations would be impactful on reducing overall  
423 population incidence due to network effects of averting further onward transmission over  
424 time and to non-key population partners.<sup>48,49</sup> Model-based counterfactual indicators that  
425 capture these impacts, such as the transmission preventable attributable fraction, are a  
426 better basis for intervention prioritisation than simple population proportions reported in  
427 survey data.<sup>48,50,51</sup>

428 Our estimates that 0.29% of men in SSA injected drugs was lower than recent  
429 estimates from Degenhardt *et al.* of 0.38%, though uncertainty ranges overlapped.<sup>22</sup>  
430 This may reflect incorporating the urban-to-rural ratio in national PSE extrapolation in  
431 this analysis. We estimated that 1.2% of women aged 15-49 years sold sex, similar to  
432 the 1.1% estimated by Laga *et al.*<sup>52</sup> Our finding of heterogeneous HIV prevalence ratios  
433 between MSM and the total population was consistent with Hessou *et al.*,<sup>53</sup> particularly  
434 in WCA where HIV burden in neighbouring countries can vary considerably. Our  
435 estimate of 57% ART coverage among MSM in 2022 was lower than 73% from a meta-  
436 analysis by Stannah *et al.*<sup>54</sup> of studies conducted up to 2022, with overlapping  
437 uncertainty. This may be due to exclusion of ART coverage using self-reported HIV  
438 status in this analysis.

439 Population size estimates measured in the same population at different times or with  
440 multiple methods were highly heterogenous, limiting data use for establishing  
441 meaningful programmatic targets or monitoring temporal trends. Very large uncertainty  
442 ranges around population size and PLHIV modelled estimates were consistent with  
443 findings of other statistically summarised and extrapolated PSE from multiple  
444 sources.<sup>55-58</sup> Non-existence of rural KPSE studies to empirically inform rural-urban  
445 population proportions contributed to five-fold or greater relative uncertainty in  
446 extrapolated national estimates. Moreover, quality assessments of individual KPSE  
447 studies were not conducted as part of this analysis. Both systematically improving and  
448 evaluating study-specific implementation quality and methodological assumptions may  
449 reduce heterogeneity and increase the utility of KPSE data.<sup>59-63</sup>

450 Seventy-two percent of MSM KPSE observations and 38/39 modelled urban MSM  
451 estimates were below 1% of the male adult (15-49 years) population which UNAIDS and  
452 WHO recommended in 2020 as a minimum MSM population proportion.<sup>64</sup> The minimum  
453 threshold was specified to ensure that MSM were not overlooked due to lack of data.  
454 Variation in MSM proportions measured in PSE studies may reflect ability to engage in  
455 sexual behaviours or surveys, affected by legal and social environment and other  
456 factors, rather than differences in distribution of sexual preference. It is also uncertain  
457 whether MSM recruited in surveys, who are disproportionately young,<sup>12,13</sup> are  
458 representative of the total MSM population. Specifying a minimum 1% threshold for  
459 MSM population could result in unrealistic MSM-focused service targets. The threshold  
460 should be reconsidered with the wider range of population size and stigma data now  
461 available, aligned with risk-based approaches to quantifying sex work and injecting drug  
462 use. Study-specific quality assessments will be important to producing accurate KPSE  
463 given stigma experienced by MSM in many settings.

464 Integrating key population programme data within key population estimates should be a  
465 priority to improve utility of surveillance data to guide programmatic response and  
466 monitor trends and subnational variation.<sup>65</sup> Triangulating routine HIV testing and  
467 treatment data with biobehavioural survey data may help disentangle programmatic  
468 double counting, coverage of key population-specific services, and accounting for  
469 linkage to care in the estimation of ART coverage and viral load suppression.<sup>66-68</sup>  
470 Future surveillance should consider moving beyond strictly defined key population  
471 definitions accurately to reflect heterogenous risks among individuals in overlapping risk

472 environments including cisgender MSM and transgender women who sell sex, and FSW  
473 and MSM who inject drugs.<sup>69–71</sup>

474 Several limitations should be considered when interpreting these data and estimates.

475 Firstly, surveys used a range of key population definitions and inclusion criteria which  
476 limited comparability, though there was sufficient overlap (Supplementary Text S2).

477 Second, lack of explicit geographic survey sampling frames made it challenging to  
478 reflect the catchment population for a given survey in matched denominators,

479 particularly given the mobility of key populations.<sup>72</sup> This likely exacerbates the observed  
480 heterogeneity in KPSE proportions (Figure 2B), and is a major limitation for

481 extrapolating KPSE proportions for programmatic planning. Going forward, specification  
482 of population catchments and careful data quality assessments to determine study

483 inclusion and interpretation will improve future data use. Third, sample size or standard  
484 errors and age ranges were omitted from most population size data entries, gender was

485 not specified for most observations among PWID, and a small number of observations  
486 were missing denominators for number tested. This limited ability to statistically weight,

487 age-standardise, or gender-match data in model extrapolations, though sensitivity

488 analyses indicate little impact on analysis conclusions. Fourth, data were insufficient

489 and too heterogeneous to estimate time trends in population proportions, HIV

490 prevalence, or ART coverage. Application of standardised recruitment methods,

491 population definitions, and indicator reporting in consistent locations will improve

492 monitoring of trends. Finally, this analysis did not include prisoners and other

493 incarcerated people and future studies should look to expand data synthesis and

494 analysis to this key population.

495 In conclusion, key populations across SSA experience disproportionate HIV burden and  
496 have lower antiretroviral therapy coverage. Consolidated key population data and  
497 synthesised estimates provide a basis for key population programming in all countries,  
498 including those with limited locally available data. Despite increasing focus on key  
499 populations in HIV/AIDS strategies in SSA, large data gaps remain and estimates are  
500 highly uncertain. New surveillance strategies, improved use of routine data, and more  
501 consistent surveillance implementation are required to furnish more precise estimates  
502 and trends for programme planning and support the monitoring of equitable and equal  
503 access to HIV prevention and treatment programmes outlined in the Global AIDS  
504 Strategy 2021-2026.



505 **Authors' contributions**

506 OS, KS, MM and JWI-E conceptualised the study. KS, SAG, JZ, AMcl, KW, JS, LD  
507 curated key population survey databases. OS, RA, EG, AS-B reviewed primary source  
508 documents, deduplicated data, and extracted data. OS analysed the data and wrote the  
509 first draft of the manuscript. All authors contributed to interpretation of results and edited  
510 the manuscript for intellectual content. All authors read and approved the final version of  
511 the manuscript for submission.

512 **Disclaimer**

513 The findings and conclusions in this report are those of the author(s) and do not  
514 necessarily represent the official position of the funding agencies.

515 **Conflict of interest**

516 SB acknowledges funding from the National Institutes of Health (NIH); FC  
517 acknowledges funding from Wellcome Trust, MRC, NIH, UNITAID, and the Bill and  
518 Melinda Gates Foundation (BMGF); LD has received untied educational grants for the  
519 study of new opioid medications in Australia from Indivior and Sequirus; LF  
520 acknowledges funding from the UKRI Medical Research Council, the Royal Society, and  
521 from the Centre for Sexual Health and HIV/AIDS Research Zimbabwe; JI-E  
522 acknowledges funding from UNAIDS, NIH, BMGF, UKRI, and BAO Systems, and  
523 received support to attend meetings from UNAIDS, the South African Centre for  
524 Epidemiological Modelling and Analysis, the International AIDS Society, and BMGF; KR

525 and MM-G received support to attend meetings from UNAIDS; JS acknowledges  
526 funding from UNAIDS; OS acknowledges funding from UNAIDS.

### 527 **Data sharing**

528 Data extracted and code to reproduce the analysis are available at  
529 <https://zenodo.org/records/10838438>.

### 530 **Acknowledgments**

531 This research was supported by UNAIDS, Bill and Melinda Gates Foundation (INV-  
532 006733), National Institute of Allergy and Infectious Disease of the National Institutes of  
533 Health under award number R01AI136664, and the MRC Centre for Global Infectious  
534 Disease Analysis (reference MR/R015600/1), jointly funded by the UK Medical  
535 Research Council (MRC) and the UK Foreign, Commonwealth & Development Office  
536 (FCDO), under the MRC/FCDO Concordat agreement and is also part of the EDCTP2  
537 programme supported by the European Union. MM-G's research program is funded by  
538 a *Canada Research Chair* (Tier II) in *Population Health Modeling*.

539 **References**

- 540 1. UNAIDS. *The Gap Report.*; 2014. Accessed April 1, 2022.  
541 [https://www.unaids.org/en/resources/documents/2014/20140716\\_UNAIDS\\_gap\\_r](https://www.unaids.org/en/resources/documents/2014/20140716_UNAIDS_gap_r)  
542 [eport](#)
- 543 2. Garnett GP. Reductions in HIV incidence are likely to increase the importance of  
544 key population programmes for HIV control in sub-Saharan Africa. *J Int AIDS*  
545 *Soc.* 2021;24(S3):e25727. doi:10.1002/jia2.25727
- 546 3. World Health Organization. *Consolidated Guidelines on HIV, Viral Hepatitis and*  
547 *STI Prevention, Diagnosis, Treatment and Care for Key Populations.*; 2022.  
548 [http://apps.who.int/iris/bitstream/10665/128048/1/9789241507431\\_eng.pdf?ua=1](http://apps.who.int/iris/bitstream/10665/128048/1/9789241507431_eng.pdf?ua=1)
- 549 4. United Nations. End Inequalities. End AIDS. Global AIDS Strategy 2021-2026 |  
550 UNAIDS. Published 2021. Accessed May 5, 2021.  
551 <https://www.unaids.org/en/resources/documents/2021/2021-2026-global-AIDS->  
552 [strategy](#)
- 553 5. Baneshi MR, Rastegari A, Haghdoost AA. Review of Size Estimation Methods. In:  
554 *Advances in Experimental Medicine and Biology.* Vol 1333. Springer; 2021:1-15.  
555 doi:10.1007/978-3-030-75464-8\_1
- 556 6. Abdul-Quader AS, Baughman AL, Hladik W. Estimating the size of key  
557 populations: Current status and future possibilities. *Curr Opin HIV AIDS.*  
558 Published online 2014. doi:10.1097/COH.0000000000000041

- 559 7. Jin H, Restar A, Beyrer C. Overview of the epidemiological conditions of HIV  
560 among key populations in Africa. *J Int AIDS Soc.* 2021;24(S3).  
561 doi:10.1002/jia2.25716
- 562 8. Hakim AJ, MacDonald V, Hladik W, et al. Gaps and opportunities: measuring the  
563 key population cascade through surveys and services to guide the HIV response.  
564 *J Int AIDS Soc.* 2018;21(Suppl Suppl 5):e25119. doi:10.1002/jia2.25119
- 565 9. Sabin K, Zhao J, Garcia Calleja JM, et al. Availability and quality of size  
566 estimations of female sex workers, men who have sex with men, people who  
567 inject drugs and transgender women in low- and middle-income countries. *PLoS*  
568 *One.* 2016;11(5). doi:10.1371/journal.pone.0155150
- 569 10. Atuhaire L, Adetokunboh O, Shumba C, Nyasulu PS. Effect of community-based  
570 interventions targeting female sex workers along the HIV care cascade in sub-  
571 Saharan Africa: a systematic review and meta-analysis. *Syst Rev.* Published  
572 online 2021. doi:10.1186/s13643-021-01688-4
- 573 11. Baral S, Beyrer C, Muessig K, et al. Burden of HIV among female sex workers in  
574 low-income and middle-income countries: A systematic review and meta-analysis.  
575 *Lancet Infect Dis.* Published online 2012. doi:10.1016/S1473-3099(12)70066-X
- 576 12. Stannah J, Dale E, Elmes J, et al. HIV testing and engagement with the HIV  
577 treatment cascade among men who have sex with men in Africa: a systematic  
578 review and meta-analysis. *Lancet HIV.* 2019;6(11):e769-e787.  
579 doi:10.1016/S2352-3018(19)30239-5

- 580 13. Stannah J, Soni N, Keng J, et al. Trends in HIV testing, the treatment cascade,  
581 and HIV incidence among men who have sex with men in Africa: A systematic  
582 review and meta-regression analysis. *Lancet HIV*. Published online 2023.  
583 doi:0.1016/S2352-3018(23)00111-X
- 584 14. Mathers BM, Degenhardt L, Phillips B, et al. Global epidemiology of injecting drug  
585 use and HIV among people who inject drugs: a systematic review. *The Lancet*.  
586 Published online 2008. doi:10.1016/S0140-6736(08)61311-2
- 587 15. Degenhardt L, Peacock A, Colledge S, et al. Global prevalence of injecting drug  
588 use and sociodemographic characteristics and prevalence of HIV, HBV, and HCV  
589 in people who inject drugs: a multistage systematic review. *Lancet Glob Health*.  
590 2017;5(12):e1192-e1207. doi:10.1016/S2214-109X(17)30375-3
- 591 16. Kloek M, Bulstra CA, van Noord L, Al-Hassany L, Cowan FM, Hontelez JAC. HIV  
592 prevalence among men who have sex with men, transgender women and  
593 cisgender male sex workers in sub-Saharan Africa: a systematic review and  
594 meta-analysis. *J Int AIDS Soc*. 2022;25(11). doi:10.1002/JIA2.26022
- 595 17. Stevens O. HIV prevalence in transgender populations and cisgender men who  
596 have sex with men in sub-Saharan Africa 2010-2022: a meta-analysis. *medRxiv*.  
597 Published online 2023. doi:10.1101/2023.11.09.23298289
- 598 18. UNAIDS. Global AIDS Monitoring 2022. Published 2022. Accessed February 18,  
599 2022. <https://www.unaids.org/en/global-aids-monitoring>

- 600 19. UNAIDS, WHO. *Recommended Population Size Estimates for Men Who Have*  
601 *Sex with Men.*; 2020.
- 602 20. Rao A, Schwartz S, Sabin K, et al. HIV-related data among key populations to  
603 inform evidence-based responses: protocol of a systematic review. *Syst Rev.*  
604 Published online 2018.
- 605 21. UNAIDS, FHI 360, WHO, CDC, PEPFAR. *Biobehavioural Survey Guidelines For*  
606 *Populations At Risk For HIV.*; 2017. Accessed February 17, 2022.  
607 <http://apps.who.int/bookorders>.
- 608 22. Degenhardt L, Webb P, Colledge-Frisby S, et al. Epidemiology of injecting drug  
609 use, prevalence of injecting-related harm, and exposure to behavioural and  
610 environmental risks among people who inject drugs: a systematic review. *Lancet*  
611 *Glob Health.* 2023;11(5):e659-e672. doi:10.1016/S2214-109X(23)00057-8
- 612 23. UNAIDS. Global AIDS Monitoring 2022. Published 2022. Accessed February 18,  
613 2022. <https://www.unaids.org/en/global-aids-monitoring>
- 614 24. UNAIDS. Key Populations Atlas. Accessed November 27, 2021.  
615 <https://kpatlas.unaids.org/dashboard>
- 616 25. Rao A, Schwartz S, Sabin K, et al. HIV-related data among key populations to  
617 inform evidence-based responses: protocol of a systematic review. *Syst Rev.*  
618 Published online 2018.

- 619 26. UNAIDS. HIV sub-national estimates viewer. Published 2021. Accessed May 12,  
620 2022. <https://naomi-spectrum.unaids.org/>
- 621 27. Eaton JW, Dwyer-Lindgren L, Gutreuter S, et al. Naomi: a new modelling tool for  
622 estimating HIV epidemic indicators at the district level in sub-Saharan Africa. *J Int*  
623 *AIDS Soc.* Published online 2021. doi:10.1002/jia2.25788
- 624 28. Global Rural-Urban Mapping Project (GRUMP). Urban boundaries. Accessed  
625 October 25, 2021. <https://sedac.ciesin.columbia.edu/data/collection/grump-v1>
- 626 29. Neal JJ, Prybylski D, Sanchez T, Hladik W. Population size estimation methods:  
627 Searching for the holy grail. *JMIR Public Health Surveill.* Published online 2020.  
628 doi:10.2196/25076
- 629 30. Eaton JW, Brown T, Puckett R, et al. The Estimation and Projection Package  
630 Age-Sex Model and the r-hybrid model: New tools for estimating HIV incidence  
631 trends in sub-Saharan Africa. *AIDS.* 2019;33(Suppl 3):S235-S244.  
632 doi:10.1097/QAD.0000000000002437
- 633 31. Johnson LF, Kariminia A, Trickey A, et al. Achieving consistency in measures of  
634 HIV-1 viral suppression across countries: derivation of an adjustment based on  
635 international antiretroviral treatment cohort data. *J Int AIDS Soc.* 2021;24 Suppl  
636 5(Suppl 5). doi:10.1002/JIA2.25776
- 637 32. Nations U, of Economic D, Affairs S, Division P. *World Urbanization Prospects*  
638 *The 2018 Revision.*; 2018.

- 639 33. Maleke K, Makhakhe N, Peters RPH, et al. HIV risk and prevention among men  
640 who have sex with men in rural South Africa. *African Journal of AIDS Research*.  
641 2017;16(1):31-38. doi:10.2989/16085906.2017.1292925
- 642 34. Wimark T. The City as a Single Gay Male Magnet? Gay and Lesbian  
643 Geographical Concentration in Sweden. 2014;752(September 2013):739-752.
- 644 35. Kobrak P, Ponce R, Zielony R. New Arrivals to New York City: Vulnerability to  
645 HIV among Urban Migrant Young Gay Men. *Arch Sex Behav*. Published online  
646 2015:2041-2053. doi:10.1007/s10508-015-0494-4
- 647 36. Johnson LF, Mulongeni P, Marr A, Lane T. Age bias in survey sampling and  
648 implications for estimating HIV prevalence in men who have sex with men:  
649 Insights from mathematical modelling. *Epidemiol Infect*. 2018;146(8):1036-1042.  
650 doi:10.1017/S0950268818000961
- 651 37. Stannah J, Dale E, Elmes J, et al. HIV testing and engagement with the HIV  
652 treatment cascade among men who have sex with men in Africa: a systematic  
653 review and meta-analysis. *Lancet HIV*. 2019;6(11):e769-e787.  
654 doi:10.1016/S2352-3018(19)30239-5
- 655 38. Jones HS, Anderson RL, Cust H, et al. HIV incidence among women engaging in  
656 sex work in sub-Saharan Africa: a systematic review and meta-analysis. *medRxiv*.  
657 Published online January 1, 2023:2023.10.17.23297108.  
658 doi:<https://doi.org/10.1101/2023.10.17.23297108>



- 659 39. UNAIDS. Global AIDS Update. Published 2021. Accessed May 12, 2022.  
660 <https://www.unaids.org/en/resources/documents/2021/2021-global-aids-update>
- 661 40. Stevens GA, Alkema L, Black RE, et al. Guidelines for Accurate and Transparent  
662 Health Estimates Reporting: the GATHER statement. *The Lancet*.  
663 2016;388(10062):e19-e23. doi:10.1016/S0140-6736(16)30388-9
- 664 41. Lyons C, Bendaud V, Bourey C, et al. Global assessment of existing HIV and key  
665 population stigma indicators: A data mapping exercise to inform country-level  
666 stigma measurement. *PLoS Med*. 2022;19(2):e1003914.  
667 doi:10.1371/JOURNAL.PMED.1003914
- 668 42. UNAIDS. Prevailing against pandemics by putting people at the centre. Published  
669 online 2020.
- 670 43. HIV Policy Lab. HIV Policy Lab. Accessed October 25, 2023.  
671 <https://www.hivpolicylab.org/>
- 672 44. Hessou PHS, Glele-Ahanhanzo Y, Adekpedjou R, et al. Comparison of the  
673 prevalence rates of HIV infection between men who have sex with men (MSM)  
674 and men in the general population in sub-Saharan Africa: A systematic review  
675 and meta-analysis. *BMC Public Health*. 2019;19(1):1634. doi:10.1186/s12889-  
676 019-8000-x

- 677 45. Stutterheim SE, Van Dijk M, Wang H, Jonas KJ. The worldwide burden of HIV in  
678 transgender individuals: An updated systematic review and meta-analysis. *PLoS*  
679 *One*. 2021;16(12 December). doi:10.1371/journal.pone.0260063
- 680 46. Degenhardt L, Peacock A, Colledge S, et al. Global prevalence of injecting drug  
681 use and sociodemographic characteristics and prevalence of HIV, HBV, and HCV  
682 in people who inject drugs: a multistage systematic review. *Lancet Glob Health*.  
683 2017;5(12):e1192-e1207. doi:10.1016/S2214-109X(17)30375-3
- 684 47. Stevens O. HIV prevalence in transgender populations and cisgender men who  
685 have sex with men in sub-Saharan Africa 2010-2021: a meta-analysis. Published  
686 online 2022.
- 687 48. Stone J, Mukandavire C, Boily M, et al. Estimating the contribution of key  
688 populations towards HIV transmission in South Africa. *J Int AIDS Soc*.  
689 2021;24(1):e25650. doi:10.1002/jia2.25650
- 690 49. Mishra S, Pickles M, Blanchard JF, Moses S, Boily MC. Distinguishing sources of  
691 HIV transmission from the distribution of newly acquired HIV infections: Why is it  
692 important for HIV prevention planning? *Sex Transm Infect*. 2014;90(1):19-25.  
693 doi:10.1136/sextrans-2013-051250
- 694 50. Mishra S, Pickles M, Blanchard JF, Moses S, Shubber Z, Boily MC. Validation of  
695 the modes of transmission model as a tool to prioritize HIV prevention targets: A  
696 comparative modelling analysis. *PLoS One*. 2014;9(7).  
697 doi:10.1371/journal.pone.0101690

- 698 51. Shubber Z, Mishra S, Vesga JF, Boily MC. The HIV modes of transmission model:  
699 A systematic review of its findings and adherence to guidelines. *J Int AIDS Soc.*  
700 2014;17(1). doi:10.7448/IAS.17.1.18928
- 701 52. Laga I, Niu X, Rucinski K, et al. Mapping the Population Size of Female Sex  
702 Worker in Countries Across Sub-Saharan Africa. *PNAS*. Published online  
703 September 19, 2023. doi:10.1073/pnas.2200633120
- 704 53. Hessou PHS, Glele-Ahanhanzo Y, Adekpedjou R, et al. Comparison of the  
705 prevalence rates of HIV infection between men who have sex with men (MSM)  
706 and men in the general population in sub-Saharan Africa: A systematic review  
707 and meta-analysis. *BMC Public Health*. 2019;19(1):1634. doi:10.1186/s12889-  
708 019-8000-x
- 709 54. Stannah J, Dale E, Elmes J, et al. HIV testing and engagement with the HIV  
710 treatment cascade among men who have sex with men in Africa: a systematic  
711 review and meta-analysis. *Lancet HIV*. Published online 2019.  
712 doi:10.1016/S2352-3018(19)30239-5
- 713 55. Edwards JK, Hileman S, Donastorg Y, et al. Estimating Sizes of Key Populations  
714 at the National Level: Considerations for Study Design and Analysis.  
715 *Epidemiology*. 2018;29(6):795-803. doi:10.1097/EDE.0000000000000906
- 716 56. Niu XM, Rao A, Chen D, et al. Using factor analyses to estimate the number of  
717 female sex workers across Malawi from multiple regional sources. *Ann Epidemiol.*  
718 2021;55:34-40. doi:10.1016/j.annepidem.2020.12.001

- 719 57. Fearon E, Chabata ST, Magutshwa S, et al. Estimating the Population Size of  
720 Female Sex Workers in Zimbabwe: Comparison of Estimates Obtained Using  
721 Different Methods in Twenty Sites and Development of a National-Level Estimate.  
722 *J Acquir Immune Defic Syndr.* 2020;85(1):30-38.  
723 doi:10.1097/QAI.0000000000002393
- 724 58. Datta A, Lin W, Rao A, et al. Bayesian Estimation of MSM Population Size in Côte  
725 d'Ivoire. *Statistics and Public Policy.* 2019;6(1):1-13.  
726 doi:10.1080/2330443X.2018.1546634
- 727 59. Wesson PD, Mirzazadeh A, McFarland W. A Bayesian approach to synthesize  
728 estimates of the size of hidden populations: The anchored multiplier. *Int J*  
729 *Epidemiol.* 2018;47(5):1636-1644. doi:10.1093/ije/dyy132
- 730 60. Fellows I. Consensus Estimate Calculator. Accessed April 11, 2022.  
731 [https://epiapps.com/shiny/app\\_direct/shinyproxy\\_combine\\_estimates/](https://epiapps.com/shiny/app_direct/shinyproxy_combine_estimates/)
- 732 61. USAID. *Namibia Small Area Estimation: Final Report Small Area Estimation of*  
733 *Key Population Sizes in Namibia: Final Report.*; 2021.
- 734 62. Datta A, Lin W, Rao A, et al. Bayesian Estimation of MSM Population Size in Côte  
735 d'Ivoire. *Statistics and Public Policy.* 2019;6(1):1-13.  
736 doi:10.1080/2330443X.2018.1546634
- 737 63. Rao A, Schwartz S, Viswasam N, et al. Evaluating the quality of HIV  
738 epidemiologic evidence for populations in the absence of a reliable sampling

- 739 frame: a modified quality assessment tool. *Ann Epidemiol.* 2022;65:78-83.  
740 doi:10.1016/J.ANNEPIDEM.2021.07.009
- 741 64. UNAIDS, WHO. *Recommended Population Size Estimates for Men Who Have*  
742 *Sex with Men.*; 2020.
- 743 65. USAID. *Namibia Small Area Estimation: Final Report Small Area Estimation of*  
744 *Key Population Sizes in Namibia: Final Report.*; 2021.
- 745 66. Scheibe AP. Still left behind: Using programmatic data to assess harm reduction  
746 service coverage and HIV treatment cascades for people who inject drugs in five  
747 South African cities. In: *IAS.* ; 2019.
- 748 67. Scheibe A, Grasso M, Raymond HF, et al. Modelling the UNAIDS 90-90-90  
749 treatment cascade for gay, bisexual and other men who have sex with men in  
750 South Africa: using the findings of a data triangulation process to map a way  
751 forward. *AIDS Behav.* 2018;22(3):853-859. doi:10.1007/s10461-017-1773-y
- 752 68. Hakim AJ, MacDonald V, Hladik W, et al. Gaps and opportunities: measuring the  
753 key population cascade through surveys and services to guide the HIV response.  
754 *J Int AIDS Soc.* 2018;21(Suppl Suppl 5):e25119. doi:10.1002/jia2.25119
- 755 69. Syvertsen JL, Agot K, Ohaga S, Bazzi AR. You can't do this job when you are  
756 sober: Heroin use among female sex workers and the need for comprehensive  
757 drug treatment programming in Kenya. *Drug Alcohol Depend.* 2019;194:495-499.  
758 doi:10.1016/j.drugalcdep.2018.10.019

- 759 70. Poteat T, Ackerman B, Diouf D, et al. HIV prevalence and behavioral and  
760 psychosocial factors among transgender women and cisgender men who have  
761 sex with men in 8 African countries: A cross-sectional analysis. *PLoS Med*.  
762 Published online 2017. doi:10.1371/journal.pmed.1002422
- 763 71. Baral SD, Poteat T, Strömdahl S, Wirtz AL, Guadamuz TE, Beyrer C. Worldwide  
764 burden of HIV in transgender women: A systematic review and meta-analysis.  
765 *Lancet Infect Dis*. 2013;13(3):214-222. doi:10.1016/S1473-3099(12)70315-8
- 766 72. Davey C, Dirawo J, Mushati P, Magutshwa S, Hargreaves JR, Cowan FM.  
767 Mobility and sex work: why, where, when? A typology of female-sex-worker  
768 mobility in Zimbabwe. *Soc Sci Med*. 2019;220:322-330.  
769 doi:10.1016/j.socscimed.2018.11.027
- 770
- 771

772 **Figures and Tables**

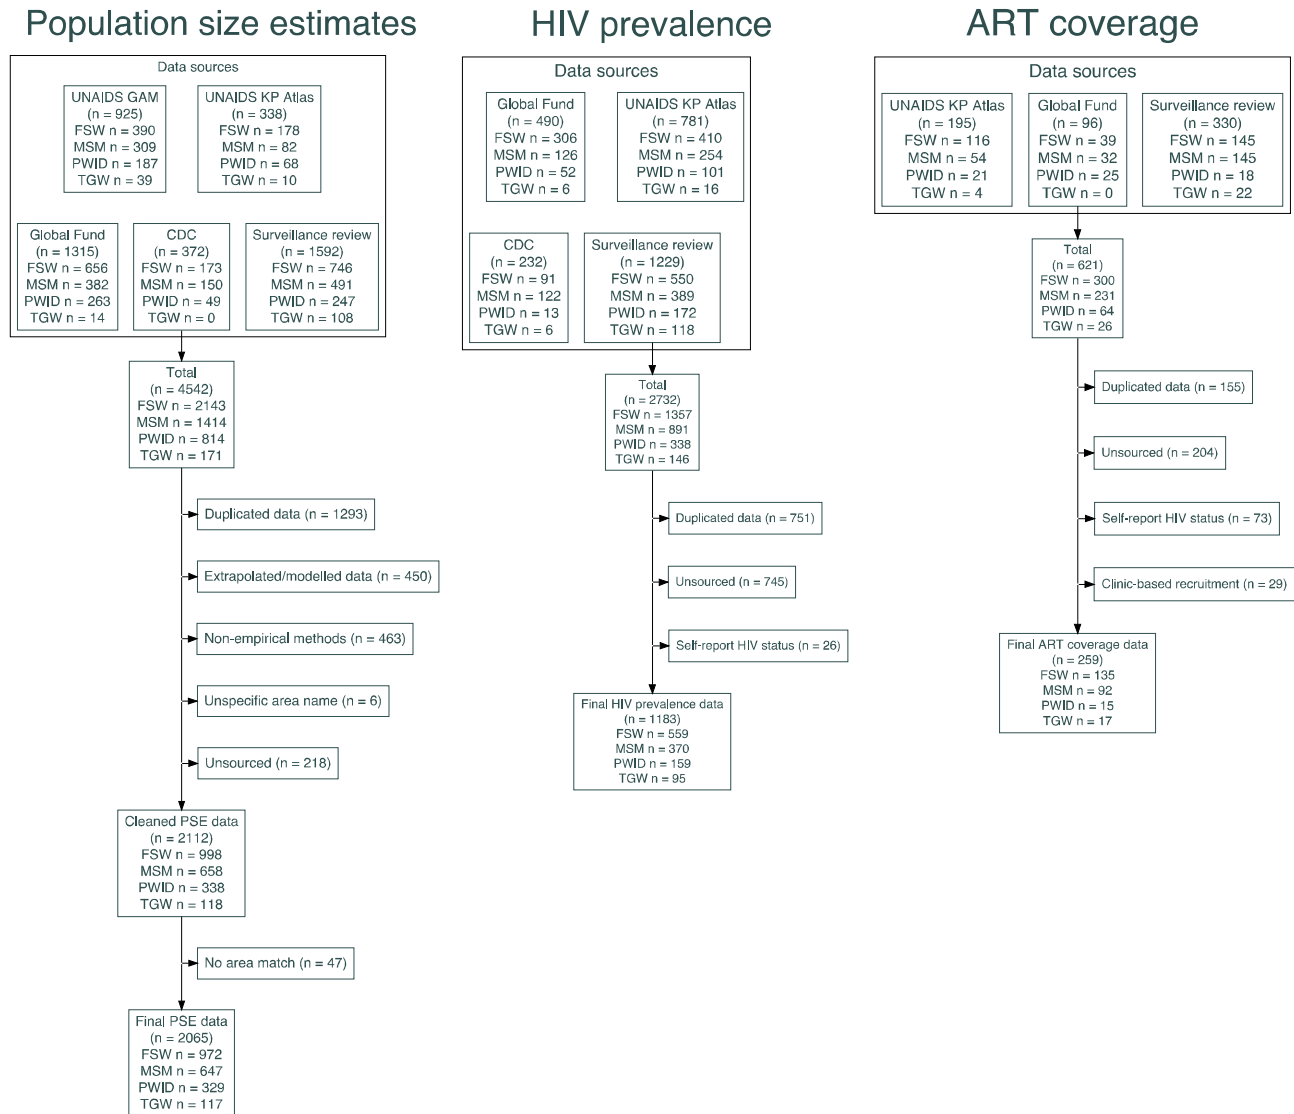

773

774 **Figure 1:** Flow diagrams describing identified data for key population size estimates, HIV prevalence  
 775 data, and key population ART coverage. Each *n* represents number of population/method/location  
 776 observations, with potentially observations for multiple subnational locations from the same study in same  
 777 country. ART: Antiretroviral therapy coverage; FSW: Female sex worker; MSM: Men who have sex with  
 778 men; PWID: People who inject drugs; TGW: Transgender women; KP: Key Population; GAM: Global  
 779 AIDS Monitoring; CDC: US Centers for Disease Control and Prevention; PSE: Population size estimate.

780

781 **Table 1:** Availability of population size, HIV prevalence, and ART coverage data by key  
 782 population and region during period 2010-2023.  
 783

| Region                | Key population | Key Population Size Estimates |                            | HIV prevalence |                            | ART coverage |                            |
|-----------------------|----------------|-------------------------------|----------------------------|----------------|----------------------------|--------------|----------------------------|
|                       |                | Data-points                   | Countries with data (n; %) | Data-points    | Countries with data (n; %) | Data-points  | Countries with data (n; %) |
| SSA<br>(39 countries) | FSW            | 972                           | 35 (90)                    | 559            | 36 (92)                    | 135          | 27 (69)                    |
|                       | MSM            | 647                           | 33 (85)                    | 370            | 34 (87)                    | 92           | 24 (62)                    |
|                       | PWID           | 329                           | 23 (59)                    | 159            | 21 (54)                    | 15           | 8 (21)                     |
|                       | TGW            | 117                           | 13 (33)                    | 95             | 23 (59)                    | 17           | 10 (26)                    |
|                       | TGM            | 16                            | 2 (5)                      | 5              | 5 (13)                     | 0            | 0 (0)                      |
| ESA<br>(18 countries) | FSW            | 450                           | 17 (94)                    | 236            | 18 (100)                   | 85           | 14 (78)                    |
|                       | MSM            | 291                           | 15 (83)                    | 127            | 15 (83)                    | 45           | 12 (67)                    |
|                       | PWID           | 156                           | 8 (44)                     | 52             | 9 (50)                     | 10           | 5 (28)                     |
|                       | TGW            | 65                            | 7 (39)                     | 38             | 12 (67)                    | 13           | 7 (39)                     |
|                       | TGM            | 16                            | 2 (11)                     | 2              | 2 (11)                     | 0            | 0 (0)                      |
| WCA<br>(21 countries) | FSW            | 522                           | 18 (86)                    | 323            | 18 (86)                    | 50           | 13 (62)                    |
|                       | MSM            | 356                           | 18 (86)                    | 243            | 19 (90)                    | 47           | 12 (57)                    |
|                       | PWID           | 173                           | 15 (71)                    | 107            | 12 (57)                    | 5            | 3 (14)                     |
|                       | TGW            | 52                            | 6 (29)                     | 57             | 11 (52)                    | 4            | 3 (14)                     |
|                       | TGM            | 0                             | 0 (0)                      | 3              | 3 (14)                     | 0            | 0 (0)                      |

784 SSA: Sub-Saharan Africa; ESA: East and Southern Africa; WCA: Western and Central Africa; FSW:  
 785 female sex workers; MSM: men who have sex with men; PWID: people who inject drugs; TGW:  
 786 transgender women; TGM: transgender men; ART: antiretroviral therapy



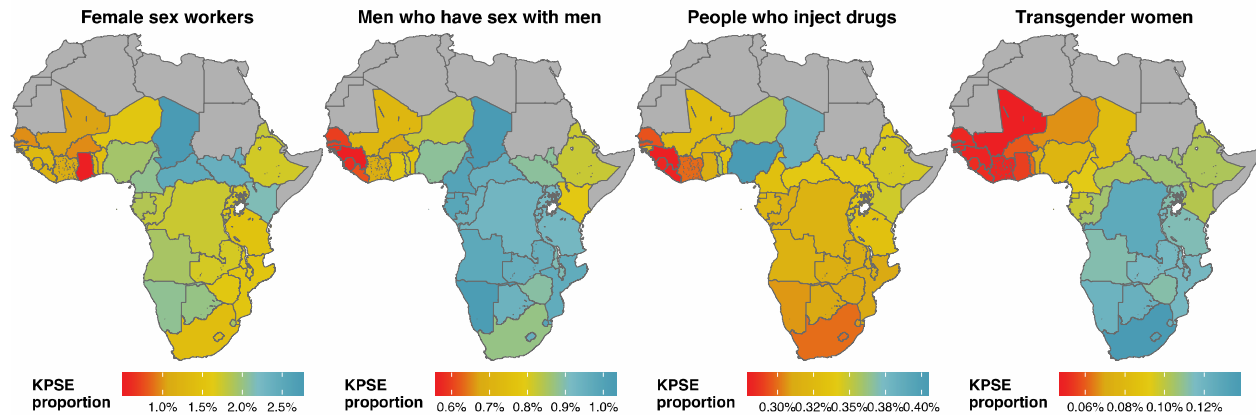

**B**

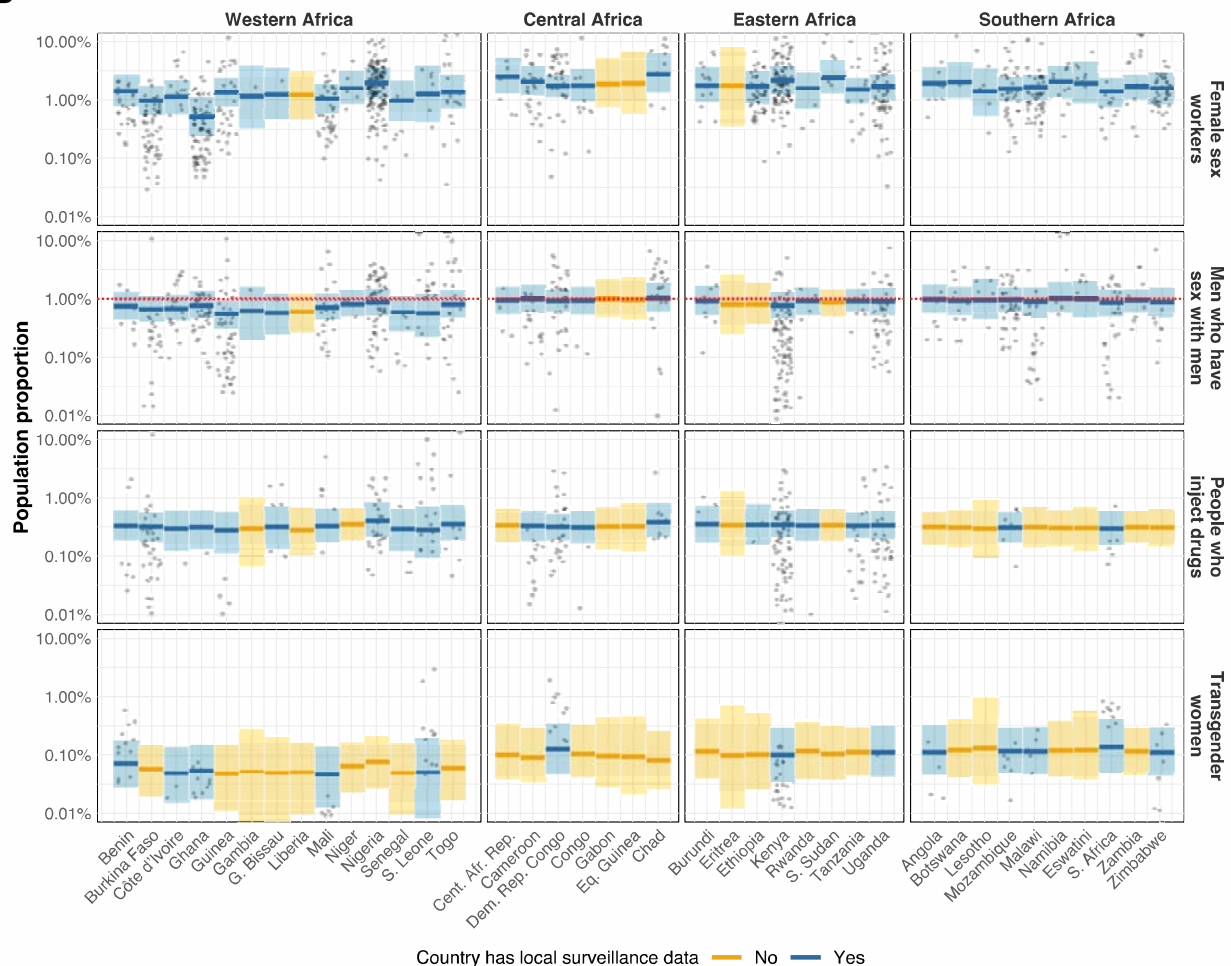

787

788

789

790

791

**Figure 2:** Model estimated urban key population size estimate (KPSE) proportions for female sex workers, men who have sex with men, people who inject drugs, and transgender women as a proportion of gender-matched 15-49 years adult total population. (A) Posterior median estimate for each country. Note: colour range is different for each key population choropleth. (B) Posterior median estimate and

792 95% credible intervals for each country. Points represent observations of subnational KPSE proportions  
793 that used empirical methods. Countries that had local surveillance data are shown in blue, and countries  
794 informed only by spatial smoothing from neighbouring countries in yellow. Vertical axis shown on log-  
795 scale.

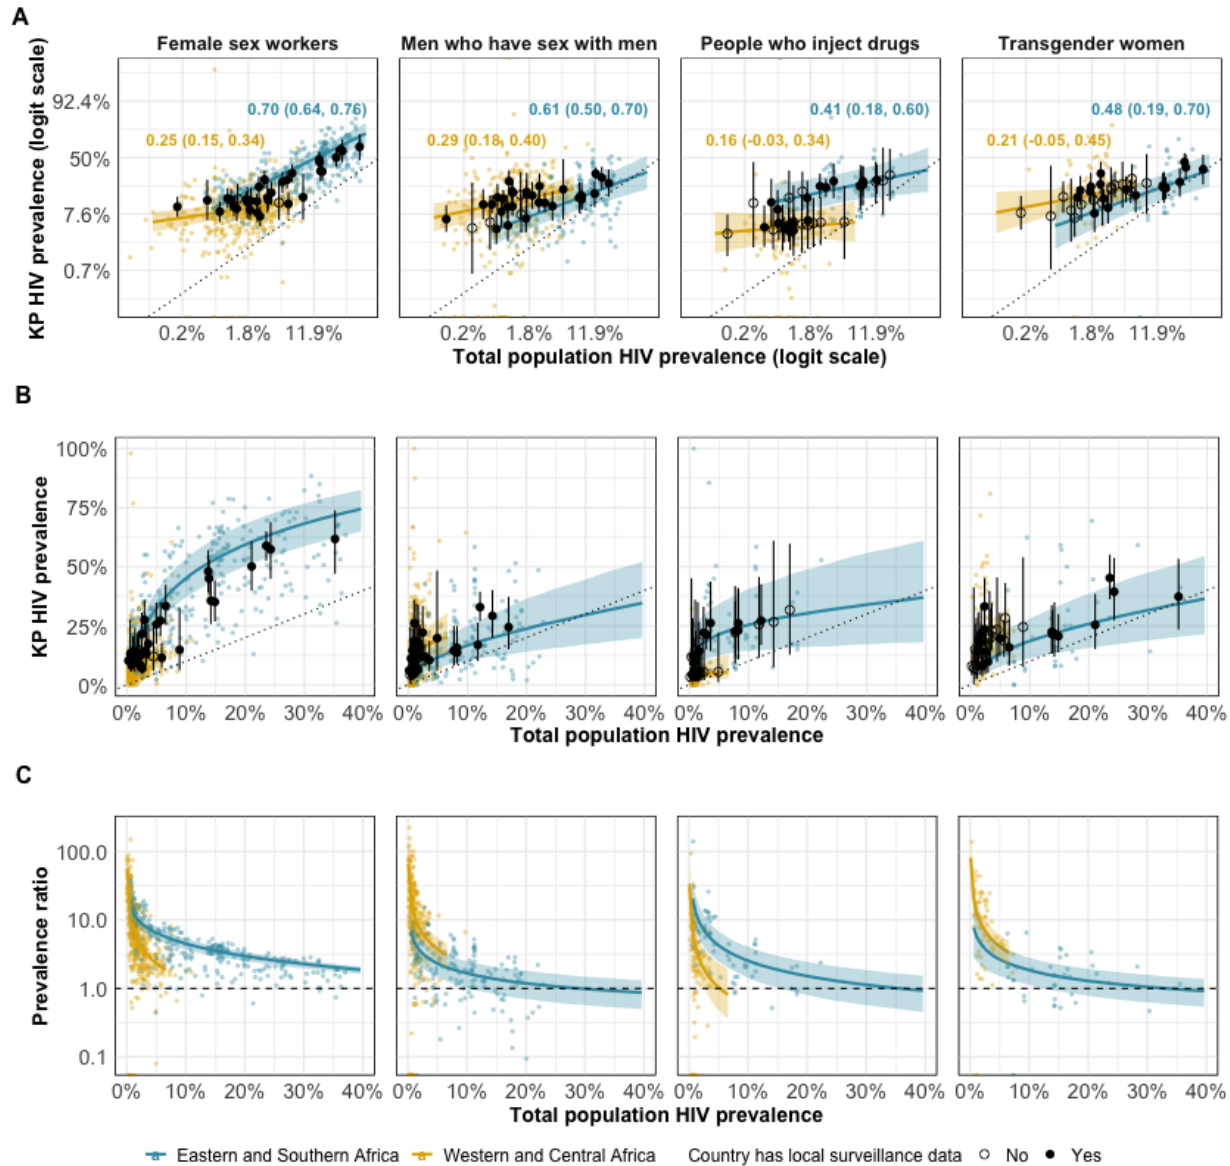

796

797 **Figure 3:** Key population and total population HIV prevalence on the logit scale (A), natural scale (B), and  
 798 expressed as a ratio of key population and total population prevalence (C) for female sex workers, men  
 799 who have sex with men, people who inject drugs, and transgender women. Coloured points indicate  
 800 observed key population prevalence plotted against gender/year/province-matched total population  
 801 prevalence. Logit-scale regional correlation coefficients and 95%CrI uncertainty intervals shown in  
 802 coloured text in panel A. Coloured lines and shading represent regional estimate and 95% uncertainty  
 803 results. Points represent country estimates [filled for countries with HIV prevalence data and empty for  
 804 countries without HIV prevalence data] and 95% uncertainty ranges. Dotted line represents line of  
 805 equality.

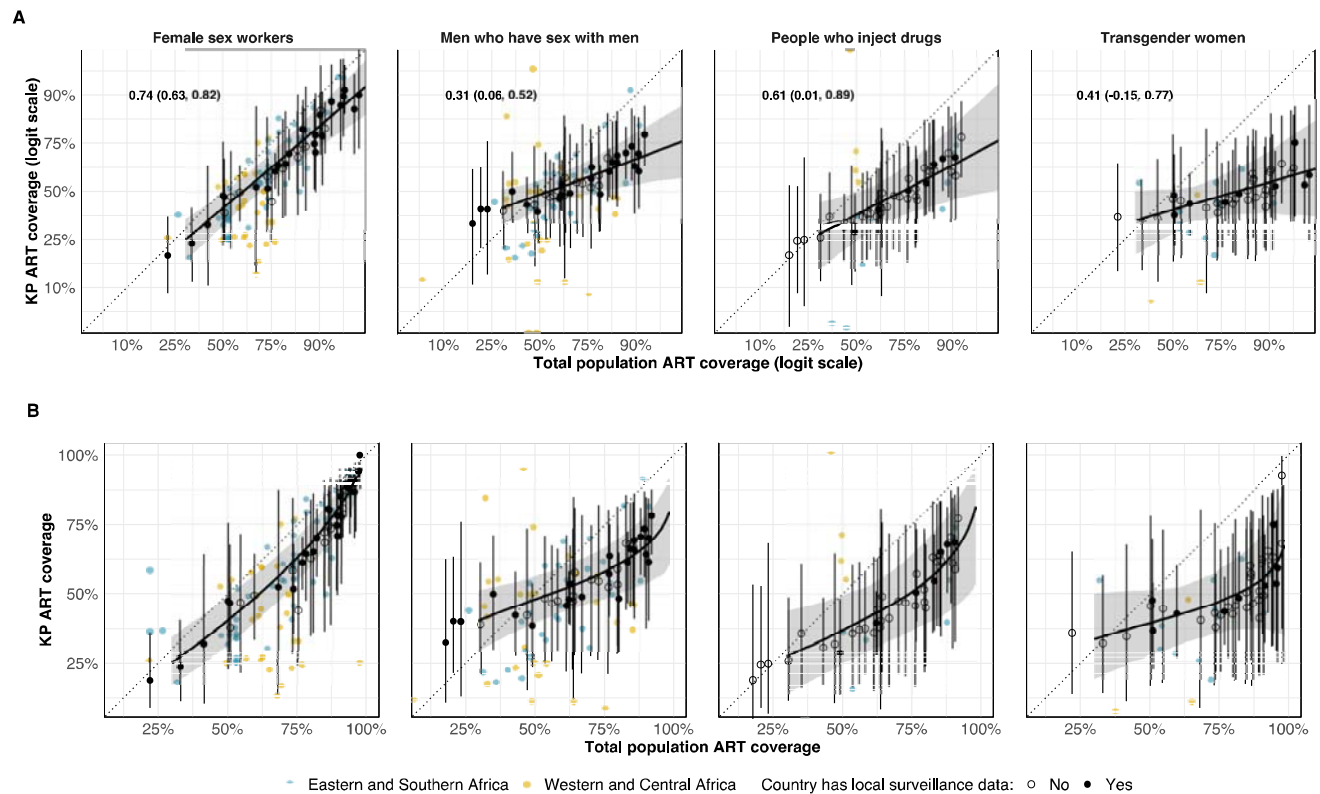

806  
807

808 **Figure 4:** Estimated key population ART coverage as a function of total population ART coverage on the  
 809 estimated logit scale (upper) and natural scale (lower). Coloured points indicate observed key population  
 810 prevalence plotted against gender/year/province-matched total population ART coverage. Logit-scale  
 811 correlation coefficients and 95%CrI uncertainty intervals shown in panel A. Black line and shading  
 812 represent estimate for sub-Saharan Africa and 95% uncertainty results. Black points represent country  
 813 estimates and 95% uncertainty ranges. Dotted line represents line of equality.

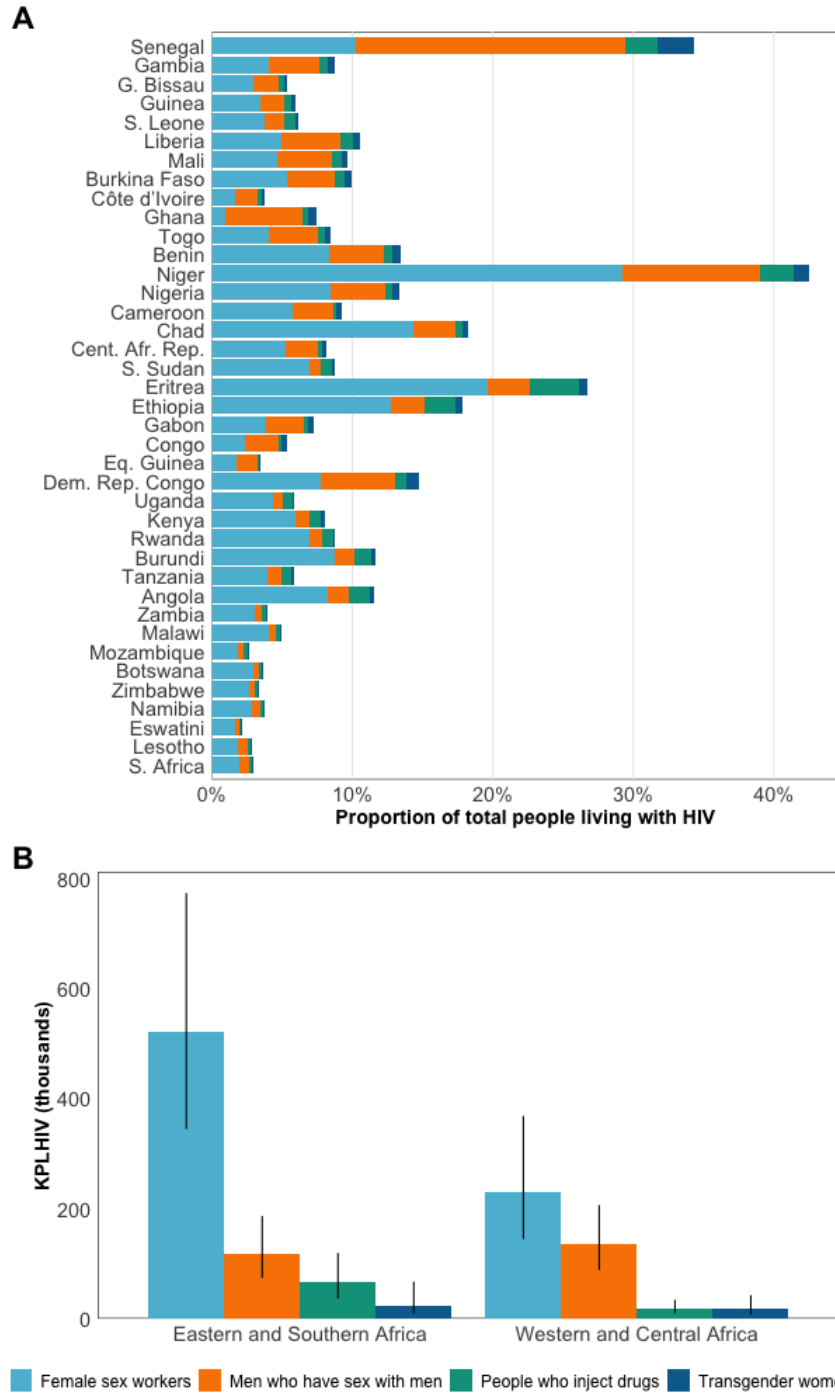

814  
815  
816  
817  
818

**Figure 5:** (A) HIV positive key population members as a proportion of all PLHIV aged 15-49 years. Countries are ordered geographically. (B) Estimated number of key populations living with HIV (KPLHIV) in Eastern and Southern Africa and Western and Central Africa.
