# Supplementary material for: Population size, HIV prevalence, and antiretroviral therapy coverage among key populations in sub-Saharan Africa: collation and synthesis of survey data 2010-2023
Source: bioRxiv or medRxiv preprint supplement (doi:10.1101/2022.07.27.22278071), 2024-05-28
Supplement: Supplementary file [file media-1.pdf]

# **Key population size, HIV prevalence, and ART coverage in sub-Saharan Africa: systematic collation and synthesis of surveillance data**

## **Supplementary Materials**

Oliver Stevens, Keith Sabin, Sonia Arias Garcia, Rebecca Anderson, Kalai Willis, Abu Abdul-Quader, Anne McIntyre, Elizabeth Fearon, Emilie Grard, Alice Stewart-Brown, Frances Cowan, Louisa Degenhardt, Jinkou Zhao, Avi Hakim, Katherine Rucinski, Isabel Sathane, Makini Boothe, Lydia Atuhuire, Peter Nyasulu, Lucy Platt, Brian Rice, Wolfgang Hladik, Stefan Baral, Mary Mahy, Jeffrey W. Eaton

Oliver Stevens

MRC Centre for Global Infectious Disease Analysis, School of Public Health, Imperial College London

St. Mary's Hospital Campus Norfolk Place London W2 1PG United Kingdom

[o.stevens@imperial.ac.uk](mailto:o.stevens@imperial.ac.uk)

## Table of Contents

|                                                                                                                                                  |    |
|--------------------------------------------------------------------------------------------------------------------------------------------------|----|
| Supplementary Text S1: Statistical model details .....                                                                                           | 3  |
| Supplementary Figure S1: MSM population size estimate proportions in Eastern and Southern Africa (ESA) and Western and Central Africa (WCA)..... | 7  |
| Supplementary Figure S2: Age group sensitivity analysis for MSM population proportion. ....                                                      | 8  |
| Supplementary Figure S3: ART coverage model sensitivity analysis. ....                                                                           | 9  |
| Supplementary Table S1: Key population databases.....                                                                                            | 12 |
| Supplementary Table S2: Extracted data indicators .....                                                                                          | 13 |
| Supplementary Table S3: Key population data sources.....                                                                                         | 14 |
| Supplementary Table S4: National availability of population size, HIV prevalence, and ART coverage data by key population .....                  | 40 |
| Supplementary Table S5: HIV prevalence model regression results. ....                                                                            | 41 |
| Supplementary Table S6: ART coverage model regression results.....                                                                               | 42 |
| Supplementary Table S7: Country-specific urban KPSE proportions (%).....                                                                         | 43 |
| Supplementary Table S8: Country-specific KP HIV prevalence estimates .....                                                                       | 45 |
| Supplementary Table S9: Country-specific KP ART coverage estimates among age 15-49 years in 2021 .....                                           | 47 |
| Supplementary Table S10: MSM age group denominator sensitivity analysis.....                                                                     | 49 |

# 1 **Supplementary Text S1: Statistical model details**

## 2 *Population size*

3 We modelled national key population proportions with a spatial smoothing model allowing population  
4 proportions to be correlated between geographically neighbouring countries. Each key population  
5 was modelled separately, with logit population proportion assumed to be normally distributed with  
6 mean  $\mu$  and standard deviation  $\sigma$ , estimated from the data.  $\mu$  is decomposed into a model intercept  
7  $\beta_0$ , a fixed effect for study method,  $X$  for  $m \in \text{Empirical, PLACE / Mapping, Other methods}$  using  
8 Empirical methods as the base group, a random effect for study method,  $\delta$  for  $j \in 1, 2 \dots 9$ , an intrinsic  
9 conditional autoregressive (ICAR) spatial smoothing random effect at the national level,  $\theta$  for  $i \in$   
0  $1, 2, \dots 38$ , and a study *iid* random effect,  $\epsilon$  for  $s \in 1, 2, \dots n$ .

$$1 \quad \text{logit}(p_i) \sim N(\mu_i, \sigma)$$

$$2 \quad \mu_i = \beta_0 + \beta_1 X_m + \delta_j + \theta_i + \epsilon_s$$

$$3 \quad \beta_0, \beta_1 \sim N(0, 5)$$

$$4 \quad \theta_i \sim \text{ICAR}(\sigma_\theta)$$

$$5 \quad \delta_j \sim N(0, \sigma_j)$$

$$6 \quad \epsilon_s \sim N(0, \sigma_s)$$

## 8 *HIV prevalence*

9 We modelled the relationship between key population HIV prevalence and total population HIV  
0 prevalence (age 15-49 years) separately for each key population. Missing denominators were  
1 imputed using the 25th centile of known denominators (FSW n=192; MSM n=108; PWID n=41).

2 The number of key population members living with HIV,  $X$ , is assumed to be betabinomially  
3 distributed with HIV positivity,  $p$  for a given age group,  $a$ , year,  $t$ , and province,  $x$ .  $p$  is decomposed  
4 into a model intercept  $\beta_0$ , fixed effects for matched total population HIV prevalence,  $\rho$ ; region,  $R \in$   
5  $ESA, WCA$ ; an interaction between matched total population HIV prevalence and region; and study  
6 method,  $M$  where  $M = 0$  for laboratory confirmed HIV status and  $M = 1$  for self-reported *HIV status*,  
7 and a study *iid* random effect,  $\epsilon$  for  $s \in 1, 2, \dots, n$ .

$$8 \quad X_{a,t,x} \sim \text{Binom}(n, p_{a,t,x})$$

$$9 \quad \text{logit}(p_{a,t,x}) = \beta_0 + \beta_1 \text{logit}(\rho_{a,t,x}) + \beta_2 R + \beta_3 \text{logit}(\rho_{a,t,x}) * R + \beta_4 M + \epsilon_s$$

$$0 \quad \beta_{0:4} \sim N(0, 5)$$

$$1 \quad \epsilon_s \sim N(0, \sigma_\epsilon)$$

## 2 *ART coverage*

3 We modelled key population ART coverage as a function of total population ART coverage,  
4 analogously to HIV prevalence. For each key population, missing denominators were imputed using  
5 the 25th centile of known denominators (FSW n=44; MSM n=23; PWID n=28).

6 The number of key population members on ART,  $A$ , is assumed to be beta-binomially distributed with  
7 the probability of being on treatment,  $p$  for a given age group,  $a$ , year,  $t$ , and province,  $x$ .  $p$  is  
8 decomposed into a model intercept  $\beta_0$ , fixed effects for matched total population ART coverage,  $\alpha$   
9 study method,  $M$  where  $M = 0$  for laboratory confirmed ART and  $M = 1$  for self-reported ART usage,  
0 and a study *iid* random effect,  $\epsilon$  for  $s \in 1, 2, \dots, n$ . Insufficient data were available to estimate region-  
1 specific trends.

$$2 \quad A_{a,t,x} \sim \text{Binom}(n, p_{a,t,x})$$

3

$$\text{logit}(p_{a,t,x}) = \beta_0 + \beta_1 \text{logit}(\alpha_{a,t,x}) + \beta_2 M + \epsilon_s$$

4

$$\beta_{0:2} \sim N(0,5)$$

5

$$\epsilon_s \sim N(0, \sigma_\epsilon)$$

6

## 7 **Supplementary Figures**

8

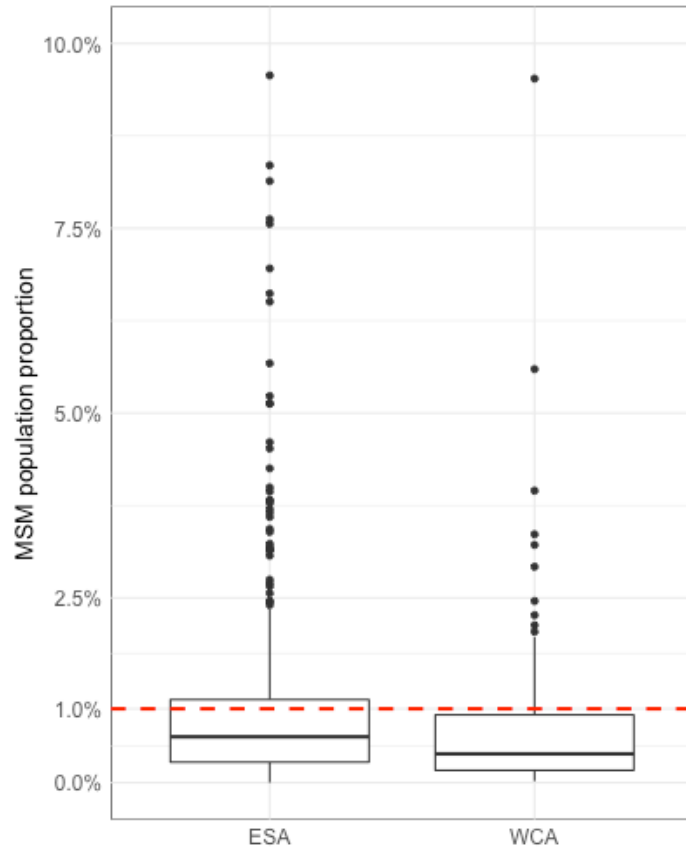

0

1 **Supplementary Figure S1: MSM population size estimate proportions in Eastern and Southern**  
2 **Africa (ESA) and Western and Central Africa (WCA).** Boxplots represent median and interquartile  
3 range of observations. Red dashed line is the recommended 1% threshold for MSM population  
4 proportions

5

6

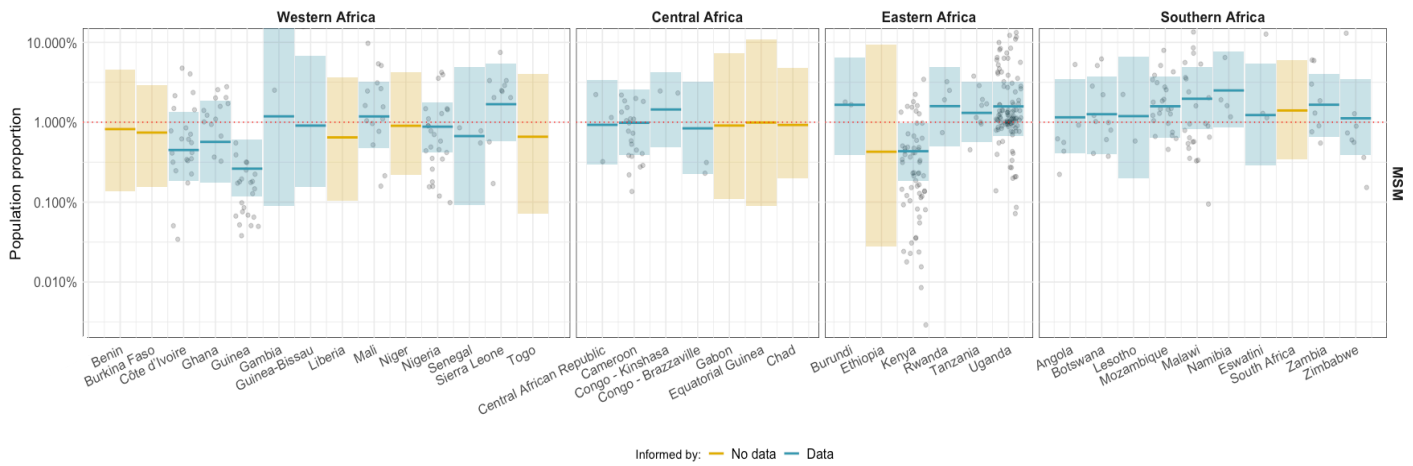

7

8

9 **Supplementary Figure S2: Age group sensitivity analysis for MSM population proportion.**

0 Estimates calculated using ages 15-29 years as the matched total population denominator instead of  
1 ages 15-49 years assumed in primary analysis.

2



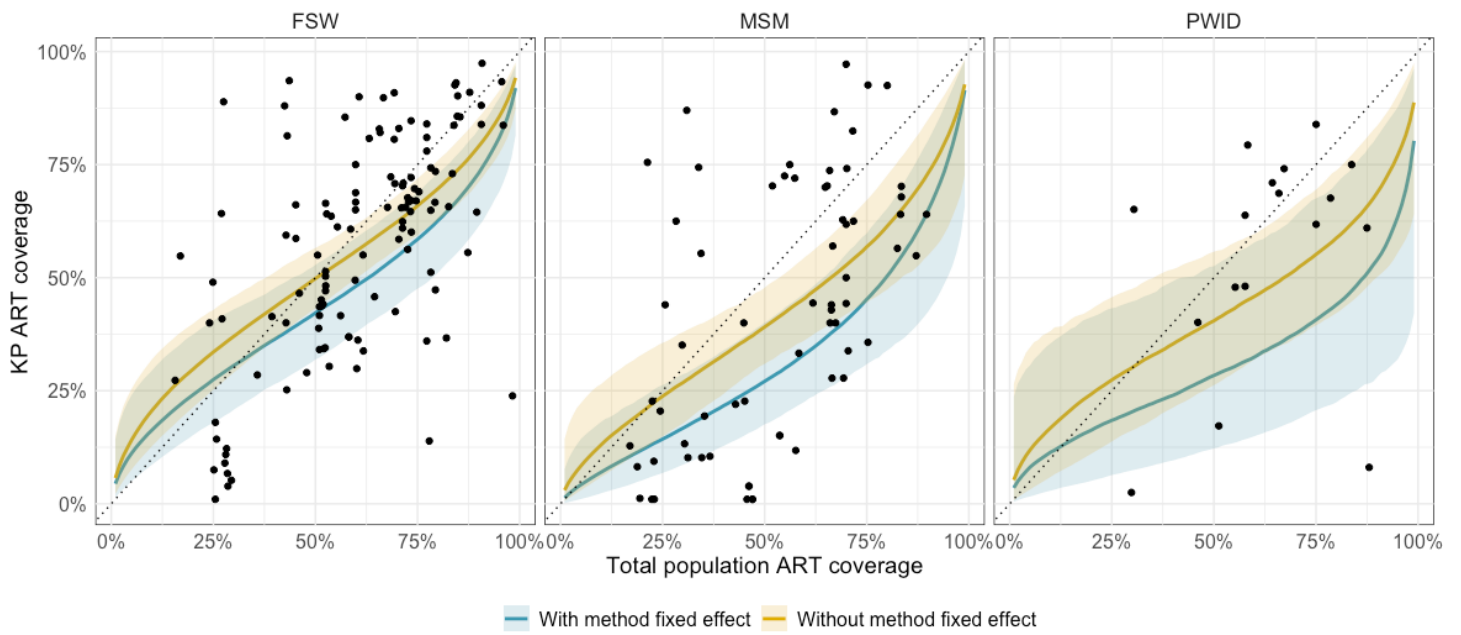

3

4 **Supplementary Figure S3: ART coverage model sensitivity analysis.** Yellow estimates are as in  
 5 primary analysis, omitting a fixed effect for study method (self-report or diagnostically confirmed ART  
 6 status). Blue estimates include a fixed effect for study method.

7



## 9 Supplementary Tables

0 **Supplementary Table S1: Key population databases**

| <b>Database</b>                          | <b>Link</b>                                                                                                               | <b>Years extracted</b> | <b>Description</b>                                                                            | <b>KP indicators captured</b>                                                                                                                                                                             | <b>Data entry</b>                                                                            |
|------------------------------------------|---------------------------------------------------------------------------------------------------------------------------|------------------------|-----------------------------------------------------------------------------------------------|-----------------------------------------------------------------------------------------------------------------------------------------------------------------------------------------------------------|----------------------------------------------------------------------------------------------|
| UNAIDS Global AIDS Monitoring (GAM)      | <a href="https://www.unaids.org/en/global-aids-monitoring">https://www.unaids.org/en/global-aids-monitoring</a>           | 2010-2022              | Global monitoring tool to track progress towards key targets and assess state of HIV epidemic | PSE, HIV prevalence, ART coverage/viral load suppression. Programme HIV prevention data on condoms, opioid substitution therapy, and needle and syringe programmes.<br><br>Raw data or modelled estimates | National government annual data submission                                                   |
| UNAIDS KP Atlas                          | <a href="https://kpatlas.unaids.org">https://kpatlas.unaids.org</a>                                                       | 2010-2022              | Consolidated database maintained by UNAIDS, supported by Global Fund, WHO, US CDC             | PSE, HIV prevalence, ART coverage, HIV testing, HIV prevention data, laws and stigma indices<br><br>Raw data or modelled estimates                                                                        | UNAIDS-maintained. Aligned with GAM since 2017                                               |
| Global Fund                              | Private                                                                                                                   | 2010-2017              | Global Fund surveillance database                                                             | PSE, HIV prevalence, ART coverage, HIV prevention<br><br>Raw data or modelled estimates                                                                                                                   | National governments through grant reporting. In recent years, aligned with KP Atlas and GAM |
| CDC                                      | Private                                                                                                                   | 2010-2022              | CDC surveillance spreadsheet                                                                  | Majority PSE, small amount of HIV prevalence and ART coverage data<br><br>Raw data or modelled estimates                                                                                                  | CDC maintained                                                                               |
| Global.HIV repository                    | <a href="https://www.ncbi.nlm.nih.gov/pmc/articles/PMC6278072/">https://www.ncbi.nlm.nih.gov/pmc/articles/PMC6278072/</a> | 2010-2017              | Systematic review database                                                                    | Wide range of epidemiological, human rights, and healthcare indicators<br><br>Raw data or modelled estimates                                                                                              | Maintained by Johns Hopkins University                                                       |
| Degenhardt et al. PWID systematic review | <a href="https://pubmed.ncbi.nlm.nih.gov/29074409/">https://pubmed.ncbi.nlm.nih.gov/29074409/</a>                         | 2010-2017              | Systematic review database                                                                    | PSE, HIV prevalence, ART coverage for PWID<br><br>Raw data only                                                                                                                                           | Maintained by University of New South Wales                                                  |

1 **Supplementary Table S2: Extracted data indicators**

| <b>Indicator</b>            | <b>Notes</b>                                                                                                                                                                                                                                                                                                                                                                                                                                                                                                                                    |
|-----------------------------|-------------------------------------------------------------------------------------------------------------------------------------------------------------------------------------------------------------------------------------------------------------------------------------------------------------------------------------------------------------------------------------------------------------------------------------------------------------------------------------------------------------------------------------------------|
| Country                     | -                                                                                                                                                                                                                                                                                                                                                                                                                                                                                                                                               |
| Method                      | <p>For PSE one of:</p> <ul style="list-style-type: none"> <li>• 2S-CRC</li> <li>• 3S-CRC</li> <li>• SS-PSE</li> <li>• Service multiplier</li> <li>• Object multiplier</li> <li>• Event multiplier</li> <li>• PLACE/Mapping</li> <li>• Multiple methods – empirical</li> <li>• Multiple methods – mixture</li> <li>• Delphi</li> <li>• Wisdom of the crowds</li> <li>• Enumeration</li> <li>• Key informant interviews</li> <li>• Literature estimate</li> </ul> <p>For HIV prevalence and ART coverage: Self-report or laboratory confirmed</p> |
| Key population              | FSW/MSM/PWID/TG/TGM/TGW                                                                                                                                                                                                                                                                                                                                                                                                                                                                                                                         |
| Age group                   | -                                                                                                                                                                                                                                                                                                                                                                                                                                                                                                                                               |
| Area                        | Survey area. In cases when multiple areas are reported as an aggregate, disaggregate to a single area per row                                                                                                                                                                                                                                                                                                                                                                                                                                   |
| Year                        | -                                                                                                                                                                                                                                                                                                                                                                                                                                                                                                                                               |
| Lower estimate              | If available                                                                                                                                                                                                                                                                                                                                                                                                                                                                                                                                    |
| Central estimate            | -                                                                                                                                                                                                                                                                                                                                                                                                                                                                                                                                               |
| Upper estimate              | If available                                                                                                                                                                                                                                                                                                                                                                                                                                                                                                                                    |
| Lower proportion estimate   | PSE only, if available                                                                                                                                                                                                                                                                                                                                                                                                                                                                                                                          |
| Central proportion estimate | PSE only, if available                                                                                                                                                                                                                                                                                                                                                                                                                                                                                                                          |
| Upper proportion estimate   | PSE only, if available                                                                                                                                                                                                                                                                                                                                                                                                                                                                                                                          |
| Denominator                 | For HIV prevalence and ART coverage only                                                                                                                                                                                                                                                                                                                                                                                                                                                                                                        |
| Source                      | -                                                                                                                                                                                                                                                                                                                                                                                                                                                                                                                                               |

2

### 3 Supplementary Table S3: Key population data sources

| Indicator      | Country | Year | KP  | Source                                                                                                                                                                                                                                                          |
|----------------|---------|------|-----|-----------------------------------------------------------------------------------------------------------------------------------------------------------------------------------------------------------------------------------------------------------------|
| ART coverage   | Angola  | 2017 | FSW | 2017 PLACE                                                                                                                                                                                                                                                      |
| HIV prevalence | Angola  | 2017 | FSW | Achieving The First 90 For Key Populations In Sub-Saharan Africa Through Venue-Based Outreach: Challenges And Opportunities For HIV Prevention Based On PLACE Study Findings From Malawi And Angola                                                             |
| HIV prevalence | Angola  | 2017 | FSW | Relatorio Do Estudo PLACE Do Linkage 2016/2017 Em 5 Provincias De Angola                                                                                                                                                                                        |
| PSE            | Angola  | 2015 | FSW | Prevalencia Do VIH, Factores Biologicos E Comportamentais Da Infeccao Entre As Profissionais Do Sexo (MTS) Em Angola                                                                                                                                            |
| PSE            | Angola  | 2017 | FSW | Mapeamento Programatico E Prevalencia De VIH E Outras Its Entre Populacoes Chave De Angola: Estudo PLACE 2017                                                                                                                                                   |
| ART coverage   | Angola  | 2017 | MSM | 2017 PLACE                                                                                                                                                                                                                                                      |
| HIV prevalence | Angola  | 2011 | MSM | Population Size, HIV, And Behavior Among MSM In Luanda, Angola: Challenges And Findings In The First Ever HIV And Syphilis Biological And Behavioral Survey, J AIDS Journal Of Acquired Immune Deficiency Syndromes, 15 Aug. 2014, Volume 66, Issue 5, P544-551 |
| HIV prevalence | Angola  | 2017 | MSM | Relatorio Do Estudo PLACE Do Linkage 2016/2017 Em 5 Provincias De Angola                                                                                                                                                                                        |
| PSE            | Angola  | 2011 | MSM | Population Size, HIV, And Behavior Among MSM In Luanda, Angola: Challenges And Findings In The First Ever HIV And Syphilis Biological And Behavioral Survey, J AIDS Journal Of Acquired Immune Deficiency Syndromes, 15 Aug. 2014, Volume 66, Issue 5, P544-551 |
| PSE            | Angola  | 2017 | MSM | Mapeamento Programatico E Prevalencia De VIH E Outras Its Entre Populacoes Chave De Angola: Estudo PLACE 2017                                                                                                                                                   |
| ART coverage   | Angola  | 2017 | TG  | 2017 PLACE                                                                                                                                                                                                                                                      |
| PSE            | Angola  | 2017 | TG  | Mapeamento Programatico E Prevalencia De VIH E Outras Its Entre Populacoes Chave De Angola: Estudo PLACE 2017                                                                                                                                                   |
| HIV prevalence | Benin   | 2011 | FSW | 2012 Benin IBBS FSW And Waitress                                                                                                                                                                                                                                |
| HIV prevalence | Benin   | 2015 | FSW | Enquete De Surveillance De Deuxieme Generation Relative Aux IST, VIH Et Sida Au Benin (Esdg-2015)                                                                                                                                                               |
| HIV prevalence | Benin   | 2017 | FSW | Enquete De Surveillance De Deuxieme Generation Relative Aux IST, VIH Et Sida Au Benin (Esdg-2017)                                                                                                                                                               |
| HIV prevalence | Benin   | 2013 | MSM | 2013 Benin IBBS                                                                                                                                                                                                                                                 |
| HIV prevalence | Benin   | 2014 | MSM | Etude De Suivi De Cohorte Pour L'Estimation De L'Incidence Du VIH Et De La Taille De La Population Des HSH Au Benin                                                                                                                                             |

|                |              |      |      |                                                                                                                                                                                  |
|----------------|--------------|------|------|----------------------------------------------------------------------------------------------------------------------------------------------------------------------------------|
| HIV prevalence | Benin        | 2015 | MSM  | Enquete De Surveillance De Deuxieme Generation (Esdg) Sur Le VIH Au Sein De La Population Des Hommes Ayant Des Rapports Sexuels Avec D,Aoautres Hommes (HSH) Au Benin            |
| HIV prevalence | Benin        | 2017 | MSM  | Enquete De Surveillance De Deuxieme Generation (Esdg) Sur Le VIH Et Le Sida Au Sein De La Population Des Hommes Ayant Des Rapports Sexuels Avec D,Aoautres Hommes (HSH) Au Benin |
| HIV prevalence | Benin        | 2013 | PWID | Enqueacte De Surveillance De Deuxieaame Geaaneaaration Du VIH Et Des IST Aupreaas Des Utilisateurs De Drogues Injectables Au Beaanin                                             |
| HIV prevalence | Benin        | 2015 | PWID | Enquete De Surveillance De Deuxieme Generation (Comportementale Et Biologique) 2015                                                                                              |
| HIV prevalence | Benin        | 2017 | PWID | Enquete De Surveillance De Deuxieme Generation Relative Aux IST, VIH, Et Sida (Esdg 2017)                                                                                        |
| HIV prevalence | Benin        | 2020 | TG   | Enquete Bio-Comportementale, Cartographie Et Estimation De La Taille Des Transgenres Au Benin, 2020                                                                              |
| PSE            | Benin        | 2020 | TG   | Enquete Bio-Comportementale, Cartographie Et Estimation De La Taille Des Transgenres Au Benin, 2020                                                                              |
| ART coverage   | Botswana     | 2017 | FSW  | Behavioral And Biological Surveillance Survey Of HIV/STI Among Select High-Risk Sub- Populations In Botswana- 2017                                                               |
| HIV prevalence | Botswana     | 2012 | FSW  | 2012 Mapping, Size Estimation & Behavioral Biological Surveillance Survey (BBSS) Of HIV/STI Among Select High-Risk Sub-Populations In Botswana.                                  |
| HIV prevalence | Botswana     | 2017 | FSW  | 2017 BBS                                                                                                                                                                         |
| PSE            | Botswana     | 2012 | FSW  | BBSS 2012                                                                                                                                                                        |
| ART coverage   | Botswana     | 2017 | MSM  | Behavioral And Biological Surveillance Survey Of HIV/STI Among Select High-Risk Sub- Populations In Botswana- 2017                                                               |
| HIV prevalence | Botswana     | 2012 | MSM  | 2012 Mapping, Size Estimation & Behavioral And Biological Surveillance Survey (BBSS) Of HIV/STI Among Select High-Risk Sub-Populations In Botswana                               |
| HIV prevalence | Botswana     | 2017 | MSM  | 2017 BBS                                                                                                                                                                         |
| PSE            | Botswana     | 2012 | MSM  | BBSS 2012                                                                                                                                                                        |
| PSE            | Botswana     | 2017 | MSM  | Mapping & Size Estimation Of Select Key Populations In Botswana (2017)                                                                                                           |
| HIV prevalence | Botswana     | 2017 | TG   | 2017 BBS                                                                                                                                                                         |
| HIV prevalence | Burkina Faso | 2010 | FSW  | Enqu,àöAte De Surveillance Comportementale aux Des Groupes A Haut Risque : Travailleuses Du Sexe (TS) Et Leurs Clients Au Burkina Faso                                           |
| HIV prevalence | Burkina Faso | 2017 | FSW  | Cartographie Programmatique , Estimation De La Taille Et Enquete Bio Comportementale Parmi Les Populations Cles ( PS, HSH, UD) Au Burkina Faso Par Le Sp/Cnls IST                |

|                |              |      |      |                                                                                                                                                                    |
|----------------|--------------|------|------|--------------------------------------------------------------------------------------------------------------------------------------------------------------------|
| PSE            | Burkina Faso | 2017 | FSW  | Cartographie Programmatique, Estimation De La Taille Et Enquete Bio- Comportementale Parmi Les Populations Cles (PS, HSH, UD) Au Burkina Faso                      |
| HIV prevalence | Burkina Faso | 2013 | MSM  | Poteat 2017                                                                                                                                                        |
| HIV prevalence | Burkina Faso | 2016 | MSM  | Stahlman et al                                                                                                                                                     |
| HIV prevalence | Burkina Faso | 2017 | MSM  | Cartographie Programmatique , Estimation De La Taille Et Enquete Bio Comportementale Parmi Les Populations Cles ( PS, HSH, UD) Au Burkina Faso Par Le Sp/Cnls IST. |
| HIV prevalence | Burkina Faso | 2017 | PWID | Cartographie Programmatique , Estimation De La Taille Et Enquete Bio Comportementale Parmi Les Populations Cles ( PS, HSH, UD) Au Burkina Faso Par Le Sp/Cnls IST. |
| PSE            | Burkina Faso | 2017 | PWID | Cartographie Programmatique, Estimation De La Taille Et Enquete Bio- Comportementale Parmi Les Populations Cles (PS, HSH, UD) Au Burkina Faso                      |
| HIV prevalence | Burkina Faso | 2013 | TG   | Poteat 2017                                                                                                                                                        |
| HIV prevalence | Burkina Faso | 2016 | TG   | Stahlman et al                                                                                                                                                     |
| HIV prevalence | Burundi      | 2014 | FSW  | Burundi PLACE Report                                                                                                                                               |
| HIV prevalence | Burundi      | 2021 | FSW  | 2021 BBS                                                                                                                                                           |
| PSE            | Burundi      | 2014 | FSW  | Burundi PLACE Report (October 2014)                                                                                                                                |
| PSE            | Burundi      | 2021 | FSW  | 2021 BBS                                                                                                                                                           |
| HIV prevalence | Burundi      | 2014 | MSM  | Burundi PLACE Report                                                                                                                                               |
| HIV prevalence | Burundi      | 2021 | MSM  | 2021 BBS                                                                                                                                                           |
| PSE            | Burundi      | 2014 | MSM  | Burundi PLACE Report (October 2014)                                                                                                                                |
| PSE            | Burundi      | 2021 | MSM  | 2021 BBS                                                                                                                                                           |
| HIV prevalence | Burundi      | 2017 | PWID | Platt et al.                                                                                                                                                       |
| HIV prevalence | Burundi      | 2021 | PWID | 2021 BBS                                                                                                                                                           |
| PSE            | Burundi      | 2021 | PWID | 2021 BBS                                                                                                                                                           |
| ART coverage   | Cameroon     | 2013 | FSW  | Antiretroviral Treatment Coverage For Men Who Have Sex With Men And Female Sex Workers Living With HIV In Cameroon                                                 |
| ART coverage   | Cameroon     | 2013 | FSW  | HIV Prevention For Populations At Risk In Cameroon                                                                                                                 |
| ART coverage   | Cameroon     | 2016 | FSW  | 2016 BBS                                                                                                                                                           |
| HIV prevalence | Cameroon     | 2016 | FSW  | 2016 Integrated Biological And Behavioral Survey (IBBS) Report Among Key Populations In Cameroon: Female Sex Workers And Men Who Have Sex With Men                 |
| PSE            | Cameroon     | 2013 | FSW  | Holland Ce, 2015 10.1097/Qai.0000000000000443.                                                                                                                     |



|                |                          |      |      |                                                                                                                                                                                                                                    |
|----------------|--------------------------|------|------|------------------------------------------------------------------------------------------------------------------------------------------------------------------------------------------------------------------------------------|
| PSE            | Cameroon                 | 2016 | FSW  | Mapping And Size Estimation Of Female Sex Workers In Cameroon: To Inform HIV Program Design And Implementation                                                                                                                     |
| PSE            | Cameroon                 | 2018 | FSW  | Cartographie Programmatique Et Estimation De Taille Des Travailleuses De Sexe, Des Hommes Ayant Des Rapports Sexuels Avec Des Hommes, Des Usagers De Drogue, Et Des Adolescent(E)S Et Jeunes Vulneables Au VIH Au Cameroun         |
| ART coverage   | Cameroon                 | 2013 | MSM  | Antiretroviral Treatment Coverage For Men Who Have Sex With Men And Female Sex Workers Living With HIV In Cameroon                                                                                                                 |
| ART coverage   | Cameroon                 | 2013 | MSM  | HIV Prevention For Populations At Risk In Cameroon                                                                                                                                                                                 |
| ART coverage   | Cameroon                 | 2016 | MSM  | 2016 BBS                                                                                                                                                                                                                           |
| HIV prevalence | Cameroon                 | 2011 | MSM  | Etude Integree De Surveillance Comportementale Et Biologique Chez Les Hommes Ayant Des Rapports Sexuels Avec Les Hommes Au Cameroun                                                                                                |
| HIV prevalence | Cameroon                 | 2016 | MSM  | 2016 Integrated Biological And Behavioral Survey (IBBS) Report Among Key Populations In Cameroon: Female Sex Workers And Men Who Have Sex With Men                                                                                 |
| PSE            | Cameroon                 | 2013 | MSM  | Holland Ce, 2015 10.1097/Qai.0000000000000443.                                                                                                                                                                                     |
| PSE            | Cameroon                 | 2018 | MSM  | Cartographie Programmatique Et Estimation De Taille Des Travailleuses De Sexe, Des Hommes Ayant Des Rapports Sexuels Avec Des Hommes, Les Usagers De Drogue Et Les Adolescent(E)S Et Jeunes Vuln,àdE-“(C)Rables Au VIH Au Cameroun |
| PSE            | Cameroon                 | 2018 | PWID | Cartographie Programmatique Et Estimation De Taille Des Travailleuses De Sexe, Des Hommes Ayant Des Rapports Sexuels Avec Des Hommes, Les Usagers De Drogue Et Les Adolescent(E)S Et Jeunes Vuln,àdE-“(C)Rables Au VIH Au Cameroun |
| PSE            | Central African Republic | 2019 | FSW  | Enquete Sur La Cartographie, L'estimation De La Taille Des Professionnelles De Sexe Et Des Hommes Ayant Des Rapports Sexuels Avec D'autres Hommes a Bangui, Boali, Bouar, Carnot Et Berberati En Republique Centrafricaine En 2019 |
| PSE            | Central African Republic | 2019 | MSM  | Enquete Sur La Cartographie, L'estimation De La Taille Des Professionnelles De Sexe Et Des Hommes Ayant Des Rapports Sexuels Avec D'autres Hommes a Bangui, Boali, Bouar, Carnot Et Berberati En Republique Centrafricaine En 2019 |
| HIV prevalence | Congo - Brazzaville      | 2012 | FSW  | Enquete Comportementale Couplee A La Serologie VIH Chez Les Professionnelles Du Sexe, Les Hommes Ayant Des Rapports Sexuels Avec Les Hommes Et Les Detenus En Republique Du Congo                                                  |
| PSE            | Congo - Brazzaville      | 2012 | FSW  | Enquete Comportementale Couplee A La Serologie VIH Chez Les Professionnelles Du Sexe, Les Hommes Ayant Des Rapports Sexuels Avec Les Hommes Et Les Detenus En Republique Du Congo Rapport Final                                    |
| PSE            | Congo - Brazzaville      | 2017 | FSW  | Rapport De La Cartographie Programmatique Et Estimation De La Taille Des Populations Cles Les Plus Exposees Aux Risques Du VIH/Sida                                                                                                |

|                |                     |      |      |                                                                                                                                                                                   |
|----------------|---------------------|------|------|-----------------------------------------------------------------------------------------------------------------------------------------------------------------------------------|
| HIV prevalence | Congo - Brazzaville | 2012 | MSM  | Enquete Comportementale Couplee A La Serologie VIH Chez Les Professionnelles Du Sexe, Les Hommes Ayant Des Rapports Sexuels Avec Les Hommes Et Les Detenus En Republique Du Congo |
| PSE            | Congo - Brazzaville | 2017 | MSM  | Rapport De La Cartographie Programmatique Et Estimation De La Taille Des Populations Cles Les Plus Exposees Aux Risques Du VIH/Sida                                               |
| PSE            | Congo - Brazzaville | 2017 | PWID | Rapport De La Cartographie Programmatique Et Estimation De La Taille Des Populations Cles Les Plus Exposees Aux Risques Du VIH/Sida                                               |
| ART coverage   | Congo - Kinshasa    | 2016 | FSW  | Rapport Annuel 2016                                                                                                                                                               |
| ART coverage   | Congo - Kinshasa    | 2019 | FSW  | Enquete De Surveillance Bio-Comportementale Aupres Des Populations Cles A Risque De L'infection Par Le VIH Dans 14 Provinces, 2018-2019                                           |
| HIV prevalence | Congo - Kinshasa    | 2012 | FSW  | BBS 2012                                                                                                                                                                          |
| HIV prevalence | Congo - Kinshasa    | 2012 | FSW  | BBS 2012 Report, Page 154 And 155                                                                                                                                                 |
| HIV prevalence | Congo - Kinshasa    | 2016 | FSW  | Rapport Annuel Pssp 2016                                                                                                                                                          |
| HIV prevalence | Congo - Kinshasa    | 2019 | FSW  | Enquete De Surveillance Bio-Comportementale Aupres Des Populations Cles A Risque De L'infection Par Le VIH Dans 14 Provinces, 2018-2019                                           |
| PSE            | Congo - Kinshasa    | 2013 | FSW  | Rapport De L'enquete Sur L'estimation De La Taille Des Populations Cles Dans Six Provinces (Bas Congo, Katanga, Kinshasa, Orientale, Nord Et Sud Kivu) En Rdc                     |
| ART coverage   | Congo - Kinshasa    | 2016 | MSM  | Rapport Annuel 2016                                                                                                                                                               |
| ART coverage   | Congo - Kinshasa    | 2019 | MSM  | Enquete De Surveillance Bio-Comportementale Aupres Des Populations Cles A Risque De L'infection Par Le VIH Dans 14 Provinces, 2018-2019                                           |
| HIV prevalence | Congo - Kinshasa    | 2011 | MSM  | Apport De Lienquete Sur Les Facteurs Explicatifs De La Seroprevalence Elevee De Liinfection A VIH/Sida Chez Les Hommes Ayant Des Rapports Sexuels Avec Les Hommes De Kinshasa     |
| HIV prevalence | Congo - Kinshasa    | 2016 | MSM  | Rapport Annuel Pssp 2016                                                                                                                                                          |
| HIV prevalence | Congo - Kinshasa    | 2019 | MSM  | Enquete De Surveillance Bio-Comportementale Aupres Des Populations Cles A Risque De L'infection Par Le VIH Dans 14 Provinces, 2018-2019                                           |
| PSE            | Congo - Kinshasa    | 2013 | MSM  | Rapport De L'enquete Sur L'estimation De La Taille Des Populations Cles Dans Six Provinces (Bas Congo, Katanga, Kinshasa, Orientale, Nord Et Sud Kivu) En Rdc                     |
| ART coverage   | Congo - Kinshasa    | 2016 | PWID | Rapport Annuel 2016                                                                                                                                                               |
| ART coverage   | Congo - Kinshasa    | 2019 | PWID | Enquete De Surveillance Bio-Comportementale Aupres Des Populations Cles A Risque De L'infection Par Le VIH Dans 14 Provinces, 2018-2019                                           |

|                |                  |      |      |                                                                                                                                                                                                               |
|----------------|------------------|------|------|---------------------------------------------------------------------------------------------------------------------------------------------------------------------------------------------------------------|
| HIV prevalence | Congo - Kinshasa | 2016 | PWID | Rapport Annuel Pssp 2016                                                                                                                                                                                      |
| HIV prevalence | Congo - Kinshasa | 2019 | PWID | Enquete De Surveillance Bio-Comportementale Aupres Des Populations Cles A Risque De L'infection Par Le VIH Dans 14 Provinces, 2018-2019                                                                       |
| PSE            | Congo - Kinshasa | 2013 | PWID | Rapport De L'enquete Sur L'estimation De La Taille Des Populations Cles Dans Six Provinces (Bas Congo, Katanga, Kinshasa, Orientale, Nord Et Sud Kivu) En Rdc                                                 |
| ART coverage   | Congo - Kinshasa | 2016 | TG   | Rapport Annuel 2016                                                                                                                                                                                           |
| HIV prevalence | Congo - Kinshasa | 2016 | TG   | Rapport Annuel Pssp 2016                                                                                                                                                                                      |
| ART coverage   | Côte d'Ivoire    | 2020 | FSW  | Enquete Bio-Comportementale Et Cartographique En Direction Des Travailleuses De Sexe Dans Cinq Localites De La Cote D'ivoire : Katiola, Yamoussoukro, Soubre, Aboisso, Agboville.                             |
| HIV prevalence | Côte d'Ivoire    | 2020 | FSW  | Enqu,àö,ÑçTe Bio-Comportementale Et Cartographique En Direction Des Travailleuses De Sexe Dans Cinq Localit,àö(C)S De La C,àö-Te D,Aoivoire : Katiola, Yamoussoukro, Soubr,àö(C), Aboisso, Agboville.         |
| PSE            | Côte d'Ivoire    | 2020 | FSW  | 2020 BBS                                                                                                                                                                                                      |
| HIV prevalence | Côte d'Ivoire    | 2012 | MSM  | ,àöEtude Sur Le VIH Et Les Facteurs De Risques Associ,àöAs Chez Les Hommes Ayant Des Rapports Sexuels Avec Des Hommes A Abidjan, C,àölte D,Aoivoire                                                           |
| HIV prevalence | Côte d'Ivoire    | 2014 | MSM  | Bouscaillou et al.                                                                                                                                                                                            |
| HIV prevalence | Côte d'Ivoire    | 2015 | MSM  | Etude Biologique Et Comportementale Des IST, Du VIH Et Du Sida Chez Les Hommes Ayant Des Rapports Sexuels Avec Des Hommes Des Villes D,Aoabidjan, Agboville, Bouakeaa, Gagnoa, Et Yamoussoukro                |
| HIV prevalence | Côte d'Ivoire    | 2016 | MSM  | Poteat 2017                                                                                                                                                                                                   |
| HIV prevalence | Côte d'Ivoire    | 2019 | MSM  | Enqueacte Bio Comportementale Du VIH Et De La Syphilis Chez Les Hommes Ayant Des Rapports Sexuels Avec D,Aoautres Hommes (HSH) Dans Les Villes De Divo, Daloa, Abengourou, Bouafleaa Et Korhogo               |
| PSE            | Côte d'Ivoire    | 2012 | MSM  | Eaatude Sur Le VIH Et Les Facteurs De Risques Associeaas Chez Les Hommes Ayant Des Rapports Sexuels Avec Des Hommes A Abidjan, Coacte D,Aoivoire                                                              |
| PSE            | Côte d'Ivoire    | 2014 | MSM  | Etude Biologique Et Comportementale Des IST, Du VIH Et Du Sida Chez Les Hommes Ayant Des Rapports Sexuels Avec Des Hommes Des Villes D,àö-ç,C-®N-çAbidjan, Agboville, Bouak,àöE-“(C), Gagnoa, Et Yamoussoukro |
| PSE            | Côte d'Ivoire    | 2018 | MSM  | Survey Of HIV And Associated Risk Factors Among Men Who Have Sex With Men In San Pedro, C,àölte D'ivoire                                                                                                      |
| PSE            | Côte d'Ivoire    | 2020 | MSM  | 2020 BBS                                                                                                                                                                                                      |
| HIV prevalence | Côte d'Ivoire    | 2014 | PWID | Sant,àö(C) Des Personnes Usag,àö(R)Res De Drogue ,àö,Ä† Abidjan En C,àö-Te D,Aoivoire                                                                                                                         |

|                |                   |      |      |                                                                                                                                                                                                                |
|----------------|-------------------|------|------|----------------------------------------------------------------------------------------------------------------------------------------------------------------------------------------------------------------|
| HIV prevalence | Côte d'Ivoire     | 2019 | PWID | Enquete Bio-Comportementale Chez Les Usagers De Drogues Y Compris Les Usagers De Drogues Injectables A Abidjan                                                                                                 |
| PSE            | Côte d'Ivoire     | 2020 | PWID | 2020 BBS                                                                                                                                                                                                       |
| HIV prevalence | Côte d'Ivoire     | 2016 | TG   | Poteat 2017                                                                                                                                                                                                    |
| HIV prevalence | Côte d'Ivoire     | 2019 | TG   | Rapport De L, Ao, à Atude Pour L, Aoidentification Des Besoins Sp, à Acifiques En Mati, à Are De Pr, à Avention Et Prise En Charge IST-VIH/Sida Chez Les Personnes Transgenres A Abidjan , Ai Cote D, Aoivoire |
| PSE            | Côte d'Ivoire     | 2020 | TG   | 2020 BBS                                                                                                                                                                                                       |
| HIV prevalence | Equatorial Guinea | 2021 | FSW  | Informe De La Encuesta Nacional Sobre Realidades Lgbiti, Trabajadores De Sexo Y Encarcelados En Las Ciudades De Malabo, Bata, Ebibeyon Y Mongo.                                                                |
| HIV prevalence | Equatorial Guinea | 2021 | MSM  | Informe De La Encuesta Nacional Sobre Realidades Lgbiti, Trabajadores De Sexo Y Encarcelados En Las Ciudades De Malabo, Bata, Ebibeyon Y Mongo.                                                                |
| ART coverage   | Eswatini          | 2020 | FSW  | 2020 BBS                                                                                                                                                                                                       |
| HIV prevalence | Eswatini          | 2014 | FSW  | PLACE 2015                                                                                                                                                                                                     |
| HIV prevalence | Eswatini          | 2020 | FSW  | IBBS 2020                                                                                                                                                                                                      |
| PSE            | Eswatini          | 2015 | FSW  | Characterizing The HIV Prevention And Treatment Needs Among Key Populations, Including Men Who Have Sex With Men And Female Sex Workers In Swaziland: From Evidence To Action                                  |
| PSE            | Eswatini          | 2020 | FSW  | IBBSS 2020                                                                                                                                                                                                     |
| ART coverage   | Eswatini          | 2020 | MSM  | 2020 BBS                                                                                                                                                                                                       |
| HIV prevalence | Eswatini          | 2011 | MSM  | Poteat 2017                                                                                                                                                                                                    |
| HIV prevalence | Eswatini          | 2014 | MSM  | PLACE 2015                                                                                                                                                                                                     |
| HIV prevalence | Eswatini          | 2020 | MSM  | IBBS 2020                                                                                                                                                                                                      |
| PSE            | Eswatini          | 2015 | MSM  | Characterizing The HIV Prevention And Treatment Needs Among Key Populations, Including Men Who Have Sex With Men And Female Sex Workers In Swaziland: From Evidence To Action                                  |
| PSE            | Eswatini          | 2020 | MSM  | IBBSS 2020                                                                                                                                                                                                     |
| ART coverage   | Eswatini          | 2020 | TG   | 2020 BBS                                                                                                                                                                                                       |
| HIV prevalence | Eswatini          | 2011 | TG   | Poteat 2017                                                                                                                                                                                                    |
| HIV prevalence | Eswatini          | 2020 | TG   | IBBS 2020                                                                                                                                                                                                      |
| HIV prevalence | Ethiopia          | 2013 | FSW  | Ethiopian National Key Population HIV Bio-Behavioral Surveillance Round I, 2013 Report                                                                                                                         |
| HIV prevalence | Ethiopia          | 2020 | FSW  | Size Estimation, HIV And Other Stis Prevalence Among Female Sex Workers In Ethiopia: National HIV And Other Stis Bio-Behavioral Survey (Nhsbs)                                                                 |

|                |          |      |      |                                                                                                                                                |
|----------------|----------|------|------|------------------------------------------------------------------------------------------------------------------------------------------------|
| PSE            | Ethiopia | 2013 | FSW  | Ethiopian National Key Population HIV Bio-Behavioral Surveillance Round I, 2013 Report                                                         |
| PSE            | Ethiopia | 2020 | FSW  | Size Estimation, HIV And Other Stis Prevalence Among Female Sex Workers In Ethiopia: National HIV And Other Stis Bio-Behavioral Survey (Nhsbs) |
| HIV prevalence | Ethiopia | 2015 | PWID | Demissie et al                                                                                                                                 |
| HIV prevalence | Ethiopia | 2019 | PWID | Population Estimation And Harm Reduction Among People Who Inject Drugs In Addis Ababa, Ethiopia                                                |
| PSE            | Ethiopia | 2019 | PWID | Population Estimation And Harm Reduction Among People Who Inject Drugs In Addis Ababa, Ethiopia                                                |
| ART coverage   | Gambia   | 2017 | FSW  | 2017 IBBS                                                                                                                                      |
| HIV prevalence | Gambia   | 2011 | FSW  | Peitzmeier 2013                                                                                                                                |
| HIV prevalence | Gambia   | 2017 | FSW  | 2017 FSW And MSM BBS                                                                                                                           |
| PSE            | Gambia   | 2018 | FSW  | IBSS 2018 Data Collection                                                                                                                      |
| ART coverage   | Gambia   | 2017 | MSM  | 2017 IBBS                                                                                                                                      |
| HIV prevalence | Gambia   | 2011 | MSM  | Mason 2013                                                                                                                                     |
| HIV prevalence | Gambia   | 2011 | MSM  | Poteat 2017                                                                                                                                    |
| HIV prevalence | Gambia   | 2017 | MSM  | 2017 FSW And MSM BBS                                                                                                                           |
| PSE            | Gambia   | 2018 | MSM  | IBSS 2018 Data Collection                                                                                                                      |
| HIV prevalence | Gambia   | 2011 | TG   | Poteat 2017                                                                                                                                    |
| HIV prevalence | Ghana    | 2015 | FSW  | 2015 FSW BBS                                                                                                                                   |
| HIV prevalence | Ghana    | 2019 | FSW  | Population Size Estimates And Integrated Biological And Behavioral Survey Among Female Sex Workers And Their Intimate Partners In Ghana        |
| PSE            | Ghana    | 2011 | FSW  | 2011 Mapping And Population Size Estimation Of Fsws In Ghana                                                                                   |
| PSE            | Ghana    | 2011 | FSW  | IBBS 2011                                                                                                                                      |
| PSE            | Ghana    | 2015 | FSW  | 2015 Mapping And Population Size Estimation Of Female Sex Workers In Ghana                                                                     |
| PSE            | Ghana    | 2020 | FSW  | National And Subnational Size Estimation Of Female Sex Workers In Ghana 2020: Comparing 3-Source Capture-Recapture With Other Approaches       |
| HIV prevalence | Ghana    | 2011 | MSM  | 2011 Men's Study                                                                                                                               |
| HIV prevalence | Ghana    | 2017 | MSM  | 2017 Ghana Men's Study                                                                                                                         |
| PSE            | Ghana    | 2011 | MSM  | The Ghana Men's Study                                                                                                                          |
| PSE            | Ghana    | 2017 | MSM  | Ghana Men's Study                                                                                                                              |

|                |               |      |      |                                                                                                                                                                               |
|----------------|---------------|------|------|-------------------------------------------------------------------------------------------------------------------------------------------------------------------------------|
| HIV prevalence | Ghana         | 2018 | PWID | Messersmith et al.                                                                                                                                                            |
| HIV prevalence | Guinea        | 2017 | FSW  | Etude De Surveillance Comportementale Et Biologique (Escomb) Sur Les IST, Le VIH/Sida Et La Syphilis Aupres Des Populations Cles Et Groupes Vulnerables                       |
| PSE            | Guinea        | 2011 | FSW  | Estimation De La Taille Des Professionnelles Du Sexe (PS) Dans La Ville De Conakry                                                                                            |
| PSE            | Guinea        | 2013 | FSW  | Etude Sur L',Ao,àN,àö-•Estimation De La Taille Des Professionnelles De Sexe (PS) a L'interieur Du Pays - Republique De Guinee, 2013                                           |
| PSE            | Guinea        | 2017 | FSW  | Rapport_etude_nationale_estimation_taille_ps_hsh_guineaae-2017                                                                                                                |
| HIV prevalence | Guinea        | 2017 | MSM  | Etude De Surveillance Comportementale Et Biologique Sur Le VIH Aupres Des Hommes Ayant Des Relations Sexuelles Avec Des Hommes (HSH) En Guinee                                |
| PSE            | Guinea        | 2011 | MSM  | Estimation De La Taille Des Hommes Ayant Des Rapports Sexuels Avec Des Hommes (HSH) Dans La Ville De Conakry                                                                  |
| PSE            | Guinea        | 2013 | MSM  | Etude D',Ao,àN,àö-•Estimation De La Taille Des Hommes Ayant Des Rapports Sexuels Avec Les Hommes (HSH) a L'interieur Du Pays-Republique De Guinee, 2013                       |
| PSE            | Guinea        | 2017 | MSM  | Rapport_etude_nationale_estimation_taille_ps_hsh_guineaae-2017                                                                                                                |
| HIV prevalence | Guinea-Bissau | 2015 | FSW  | Rapport D'activite National                                                                                                                                                   |
| HIV prevalence | Guinea-Bissau | 2017 | FSW  | 2017 IBBS                                                                                                                                                                     |
| HIV prevalence | Guinea-Bissau | 2017 | FSW  | 2018 IBBS                                                                                                                                                                     |
| HIV prevalence | Guinea-Bissau | 2010 | MSM  | Estudo Explorat"Rio De Homens Que Fazem Sexo Com Homens Na Guine-Bissau                                                                                                       |
| HIV prevalence | Guinea-Bissau | 2015 | MSM  | Rapport D'activite National                                                                                                                                                   |
| HIV prevalence | Guinea-Bissau | 2017 | MSM  | Estudo Biolo_gico E Socio Comportamental E Estimativa Do Tamanho Nas Populacoes Mais Expostas Ao Risco De Infecao Pelo VIH Na Republica Da Guine-Bissau                       |
| PSE            | Guinea-Bissau | 2017 | MSM  | Estudo Biologico E S,àö,â•Cio Comportamental E Estimativa Do Tamanho Nas Populates Mais Expostas Ao Risco De Infe,àöSs,àö-£O Pelo VIH Na Rep,àö,à´ Blica Da Guin,àö(C)-Bissau |
| ART coverage   | Haiti         | 2016 | FSW  | 2017 PLACE                                                                                                                                                                    |
| ART coverage   | Haiti         | 2016 | MSM  | 2017 PLACE                                                                                                                                                                    |
| ART coverage   | Haiti         | 2016 | TG   | 2017 PLACE                                                                                                                                                                    |
| ART coverage   | Kenya         | 2015 | FSW  | Polling Booth Survey 2016                                                                                                                                                     |
| ART coverage   | Kenya         | 2017 | FSW  | Polling Booth Survey 2017                                                                                                                                                     |
| HIV prevalence | Kenya         | 2010 | FSW  | 2010 IBBS                                                                                                                                                                     |

|                |       |      |      |                                                                                                                        |
|----------------|-------|------|------|------------------------------------------------------------------------------------------------------------------------|
| HIV prevalence | Kenya | 2011 | FSW  | 2010-2011 Integrated Biological And Behavioural Surveillance Survey Among Key Populations In Nairobi And Kisumu, Kenya |
| HIV prevalence | Kenya | 2011 | FSW  | Baral 2012                                                                                                             |
| PSE            | Kenya | 2012 | FSW  | Estimating The Size Iof The Female Sex Worker Population In Kenya To Inform HIV Prevention Programming                 |
| PSE            | Kenya | 2012 | FSW  | Geographic Mapping Of Most At Risk Populations For HIV (MARPS) In Kenya                                                |
| PSE            | Kenya | 2013 | FSW  | Kenya Most At Risk Populations Size Estimate Consensus Report                                                          |
| PSE            | Kenya | 2020 | FSW  | National Key Population Size Estimates In Kenya                                                                        |
| ART coverage   | Kenya | 2015 | MSM  | Polling Booth Survey 2016                                                                                              |
| ART coverage   | Kenya | 2016 | MSM  | Hptn 075                                                                                                               |
| ART coverage   | Kenya | 2017 | MSM  | Polling Booth Survey 2017                                                                                              |
| ART coverage   | Kenya | 2017 | MSM  | Smith et al                                                                                                            |
| HIV prevalence | Kenya | 2010 | MSM  | 2010-2011 Integrated Biological And Behavioural Surveillance Survey Among Key Populations In Nairobi And Kisumu, Kenya |
| HIV prevalence | Kenya | 2011 | MSM  | Integrated Biological And Behavior Survey In Nairobi - 2010                                                            |
| HIV prevalence | Kenya | 2016 | MSM  | Hptn 075                                                                                                               |
| HIV prevalence | Kenya | 2017 | MSM  | Smith et al                                                                                                            |
| PSE            | Kenya | 2012 | MSM  | Geographic Mapping Of Most At Risk Populations For HIV (MARPS) In Kenya                                                |
| PSE            | Kenya | 2018 | MSM  | Key Population Mapping And Size Estimation In Selected Counties In Kenya: Phase 1                                      |
| PSE            | Kenya | 2020 | MSM  | National Key Population Size Estimates In Kenya                                                                        |
| ART coverage   | Kenya | 2015 | PWID | Polling Booth Survey 2016                                                                                              |
| ART coverage   | Kenya | 2017 | PWID | Polling Booth Survey 2017                                                                                              |
| HIV prevalence | Kenya | 2010 | PWID | Singh I Degenhardt et al, 2017                                                                                         |
| HIV prevalence | Kenya | 2011 | PWID | 2010-2011 Integrated Biological And Behavioural Surveillance Survey Among Key Populations In Nairobi And Kisumu, Kenya |
| HIV prevalence | Kenya | 2012 | PWID | Kurth I Degenhardt et al, 2017                                                                                         |
| HIV prevalence | Kenya | 2013 | PWID | Internationalaidssoc I Degenhardt et al, 2017                                                                          |
| HIV prevalence | Kenya | 2013 | PWID | Mwatelah I Degenhardt et al, 2017                                                                                      |
| HIV prevalence | Kenya | 2013 | PWID | Webale I Degenhardt et al, 2017                                                                                        |
| HIV prevalence | Kenya | 2014 | PWID | Syvertsen et al 2015                                                                                                   |
| HIV prevalence | Kenya | 2018 | PWID | Oguya et al 2021                                                                                                       |

|                |         |      |      |                                                                                                                             |
|----------------|---------|------|------|-----------------------------------------------------------------------------------------------------------------------------|
| PSE            | Kenya   | 2012 | PWID | Geographic Mapping Of Most At Risk Populations For HIV (MARPS) In Kenya                                                     |
| PSE            | Kenya   | 2013 | PWID | Kenya Most At Risk Populations Size Estimate Consensus Report                                                               |
| PSE            | Kenya   | 2018 | PWID | Key Population Mapping And Size Estimation In Selected Counties In Kenya: Phase 1                                           |
| PSE            | Kenya   | 2020 | PWID | National Key Population Size Estimates In Kenya                                                                             |
| ART coverage   | Kenya   | 2016 | TG   | Hptn 075                                                                                                                    |
| ART coverage   | Kenya   | 2017 | TG   | Smith et al                                                                                                                 |
| HIV prevalence | Kenya   | 2016 | TG   | Hptn 075                                                                                                                    |
| HIV prevalence | Kenya   | 2017 | TG   | Smith et al                                                                                                                 |
| PSE            | Kenya   | 2018 | TG   | Key Population Mapping And Size Estimation In Selected Counties In Kenya: Phase 1                                           |
| HIV prevalence | Lesotho | 2014 | FSW  | Characterizing HIV Prevention, Treatment And Care Needs Among,Ä†Men Who Have Sex With Men And Female Sex Workers In Lesotho |
| HIV prevalence | Lesotho | 2014 | FSW  | Lesotho Stakeholder Prelim                                                                                                  |
| HIV prevalence | Lesotho | 2019 | FSW  | IBBS2 Report                                                                                                                |
| PSE            | Lesotho | 2014 | FSW  | Characterizing HIV Prevention, Treatment And Care Needs Among Men Who Have Sex With Men And Female Sex Workers In Lesotho   |
| HIV prevalence | Lesotho | 2014 | MSM  | Characterizing HIV Prevention, Treatment And Care Needs Among,Ä†Men Who Have Sex With Men And Female Sex Workers In Lesotho |
| HIV prevalence | Lesotho | 2014 | MSM  | Lesotho Stakeholder Prelim                                                                                                  |
| HIV prevalence | Lesotho | 2014 | MSM  | Poteat 2017                                                                                                                 |
| HIV prevalence | Lesotho | 2019 | MSM  | IBBS2 Report                                                                                                                |
| PSE            | Lesotho | 2014 | MSM  | Characterizing HIV Prevention, Treatment And Care Needs Among Men Who Have Sex With Men And Female Sex Workers In Lesotho   |
| HIV prevalence | Lesotho | 2014 | TG   | Poteat 2017                                                                                                                 |
| ART coverage   | Malawi  | 2017 | FSW  | 2017 PLACE                                                                                                                  |
| ART coverage   | Malawi  | 2020 | FSW  | 2019/20 BBS                                                                                                                 |
| HIV prevalence | Malawi  | 2013 | FSW  | 2013 Malawi Biological And Behavioural Surveillance Study                                                                   |
| HIV prevalence | Malawi  | 2018 | FSW  | PLACE                                                                                                                       |
| HIV prevalence | Malawi  | 2020 | FSW  | Malawi Biological And Behavioural Surveillance Survey                                                                       |



|                |        |      |     |                                                                                                                                                                                                    |
|----------------|--------|------|-----|----------------------------------------------------------------------------------------------------------------------------------------------------------------------------------------------------|
| PSE            | Malawi | 2011 | FSW | Counting The Uncatchables: Report Of The Situation Analysis Of The Magnitude, Behavioural Patterns, Contributing Factors, Current Interventions And Impact Of Sex Work In HIV Prevention In Malawi |
| PSE            | Malawi | 2014 | FSW | Malawi Biological And Behavioural Surveillance Survey, Size Estimation Report                                                                                                                      |
| PSE            | Malawi | 2018 | FSW | Malawi 2018 PLACE Report                                                                                                                                                                           |
| PSE            | Malawi | 2019 | FSW | 2019-2020 BBS                                                                                                                                                                                      |
| ART coverage   | Malawi | 2014 | MSM | 2014 HIV Prevalence And Sociobehavioral Characteristics Among Men Who Have Sex With Men Across Seven Sites In Malawi                                                                               |
| ART coverage   | Malawi | 2014 | MSM | 2014 HIV Prevalence And Sociobehavioral Characteristics Among Men Who Have Sex With Men In Blantyre, Lilongwe, And Mzuzu, Malawi                                                                   |
| ART coverage   | Malawi | 2016 | MSM | Hptn 075                                                                                                                                                                                           |
| ART coverage   | Malawi | 2017 | MSM | 2017 PLACE                                                                                                                                                                                         |
| ART coverage   | Malawi | 2020 | MSM | 2019/20 BBS                                                                                                                                                                                        |
| HIV prevalence | Malawi | 2012 | MSM | HIV And Syphilis Prevalence Estimates Among Men Who Have Sex With Men In Blantyre, Chikwawa, Lilongwe, Mangochi, Mulanje, Mzuzu, And Nkhata Bay Malawi                                             |
| HIV prevalence | Malawi | 2012 | MSM | Poteat 2017                                                                                                                                                                                        |
| HIV prevalence | Malawi | 2013 | MSM | HIV And Syphilis Prevalence Estimates Among Men Who Have Sex With Men In Blantyre, Chikwawa, Lilongwe, Mangochi, Mulanje, Mzuzu, And Nkhata Bay Malawi                                             |
| HIV prevalence | Malawi | 2014 | MSM | Geographical Disparities In HIV Prevalence And Care Among Men Who Have Sex With Men In Malawi                                                                                                      |
| HIV prevalence | Malawi | 2014 | MSM | HIV And Syphilis Prevalence Estimates Among Men Who Have Sex With Men In Blantyre, Chikwawa, Lilongwe, Mangochi, Mulanje, Mzuzu, And Nkhata Bay Malawi                                             |
| HIV prevalence | Malawi | 2016 | MSM | Hptn 075                                                                                                                                                                                           |
| HIV prevalence | Malawi | 2018 | MSM | PLACE                                                                                                                                                                                              |
| HIV prevalence | Malawi | 2020 | MSM | Malawi Biological And Behavioural Surveillance Survey                                                                                                                                              |
| PSE            | Malawi | 2018 | MSM | Malawi 2018 PLACE Report                                                                                                                                                                           |
| PSE            | Malawi | 2019 | MSM | 2019-2020 BBS                                                                                                                                                                                      |
| ART coverage   | Malawi | 2016 | TG  | Hptn 075                                                                                                                                                                                           |
| HIV prevalence | Malawi | 2012 | TG  | Poteat 2017                                                                                                                                                                                        |
| HIV prevalence | Malawi | 2016 | TG  | Hptn 075                                                                                                                                                                                           |
| HIV prevalence | Malawi | 2020 | TG  | Malawi Biological And Behavioural Surveillance Survey                                                                                                                                              |

|                |        |      |      |                                                                                                                                                                                                                                                 |
|----------------|--------|------|------|-------------------------------------------------------------------------------------------------------------------------------------------------------------------------------------------------------------------------------------------------|
| HIV prevalence | Malawi | 2021 | TG   | HIV Risk, Access To Health Services And Population Size Estimate Of Transgender Community In Malawi                                                                                                                                             |
| PSE            | Malawi | 2021 | TG   | HIV Risk, Access To Health Services And Population Size Estimate Of Transgender Community In Malawi                                                                                                                                             |
| HIV prevalence | Mali   | 2018 | FSW  | Toukara 2020                                                                                                                                                                                                                                    |
| HIV prevalence | Mali   | 2019 | FSW  | Etude Bio-Comportementale IST, VIH Et Tuberculose Chez Les Femmes Travailleuses Du Sexe Et Les Routiers Au Mali 2017-2019                                                                                                                       |
| PSE            | Mali   | 2015 | FSW  | Cartographie Des Zones D'intervention Et Estimation De La Taille Des TS Et HSH, 2015                                                                                                                                                            |
| PSE            | Mali   | 2019 | FSW  | Cartographie Et Estimation De La Taille Des Professionnelles De Sexe (PS) Et Des Hommes Ayant Des Rapports Sexuels Avec D'autres Hommes (HSH) Coupl,àö(C)Es ,àö,Ä† L',àö(C)Tude Bio-Comportementale Chez Les HSH En Mati,àö(R)Re De VIH Au Mali |
| ART coverage   | Mali   | 2015 | MSM  | Hakim 2018                                                                                                                                                                                                                                      |
| ART coverage   | Mali   | 2019 | MSM  | Cartographie Et Estimation De La Taille Des Professionnelles De Sexe (PS) Et Des Hommes Ayant Des Rapports Sexuels Avec D'autres Hommes (HSH) Couplees A L'etude Bio-Comportementale Chez Les HSH En Matiere De VIH Au Mali                     |
| HIV prevalence | Mali   | 2015 | MSM  | Hakim 2018                                                                                                                                                                                                                                      |
| HIV prevalence | Mali   | 2015 | MSM  | Rapport ,àöAtude Bio-Comportementale Sur Les Hommes Qui Ont Des Rapports Sexuels Avec D'autres Hommes ,àö,Ä† Bamako, Mali, 2014-15                                                                                                              |
| HIV prevalence | Mali   | 2019 | MSM  | Cartographie Et Estimation De La Taille Des Professionnelles De Sexe (PS) Et Des Hommes Ayant Des Rapports Sexuels Avec Diautres Hommes (HSH) Couplees ,Ä° Lietude Bio-Comportementale Chez Les HSH En Matiere De VIH Au Mali                   |
| PSE            | Mali   | 2015 | MSM  | Cartographie Des Zones D'intervention Et Estimation De La Taille Des TS Et HSH, 2015                                                                                                                                                            |
| PSE            | Mali   | 2019 | MSM  | Cartographie Et Estimation De La Taille Des Professionnelles De Sexe (PS) Et Des Hommes Ayant Des Rapports Sexuels Avec D'autres Hommes (HSH) Coupl,àö(C)Es ,àö,Ä† L',àö(C)Tude Bio-Comportementale Chez Les HSH En Mati,àö(R)Re De VIH Au Mali |
| PSE            | Mali   | 2017 | PWID | Estimation Scientifique De La Taille Et Cartographie Des Utilisateurs De Drogues Par Injection En Relation Avec L'infection Par Le VIH Au Mali                                                                                                  |
| ART coverage   | Mali   | 2015 | TG   | Hakim 2018                                                                                                                                                                                                                                      |
| ART coverage   | Mali   | 2019 | TG   | Analyse De La Situation Des Personnes Transgenres Au Mali En Relation Avec L'infection A VIH Et Le Sida                                                                                                                                         |
| HIV prevalence | Mali   | 2015 | TG   | Hakim 2018                                                                                                                                                                                                                                      |

|                |            |      |      |                                                                                                                         |
|----------------|------------|------|------|-------------------------------------------------------------------------------------------------------------------------|
| HIV prevalence | Mali       | 2019 | TG   | Analyse De La Situation Des Personnes Transgenres Au Mali En Relation Avec L'infection A VIH Et Le Sida                 |
| PSE            | Mali       | 2019 | TG   | Analyse De La Situation Des Personnes Transgenres Au Mali En Relation Avec Infection A VIH Et Le Sida                   |
| ART coverage   | Mozambique | 2012 | FSW  | The Integrated Biological And Behavioral Survey Among Female Sex Workers, Mozambique 2011-2012                          |
| ART coverage   | Mozambique | 2017 | FSW  | 2017 PLACE                                                                                                              |
| HIV prevalence | Mozambique | 2012 | FSW  | IBBS Report 2011/12                                                                                                     |
| HIV prevalence | Mozambique | 2017 | FSW  | 2017 PLACE                                                                                                              |
| HIV prevalence | Mozambique | 2021 | FSW  | Inquerito Biologico E Comportamental Em Mulheres Trabalhadoras De Sexo, Segunda Ronda, Mocambique, 2019-2020            |
| PSE            | Mozambique | 2012 | FSW  | The Integrated Biological And Behavioral Survey Among Female Sex Workers, Mozambique 2011,Ai2012                        |
| PSE            | Mozambique | 2017 | FSW  | Mapeamento Programatico E Prevalencia De HIV Entre Populates Chave Em 5 Provincias De Mo,àöSsambique: Estudo PLACE 2017 |
| PSE            | Mozambique | 2021 | FSW  | Inquerito Biologico E Comportamental Em Mulheres Trabalhadoras De Sexo, Segunda Ronda, Mo,àöSsambique, 2019-2020        |
| ART coverage   | Mozambique | 2017 | MSM  | 2017 PLACE                                                                                                              |
| HIV prevalence | Mozambique | 2011 | MSM  | IBBS Report 2011                                                                                                        |
| HIV prevalence | Mozambique | 2017 | MSM  | 2017 PLACE                                                                                                              |
| HIV prevalence | Mozambique | 2021 | MSM  | Inquerito Biologico E Comportamental Entre Homens Que Fazem Sexo Com Homens, Segunda Ronda, Mocambique, 2020-2021       |
| PSE            | Mozambique | 2011 | MSM  | The Integrated Biological And Behavioral Survey Among Men Who Have Sex With Men, Mozambique                             |
| PSE            | Mozambique | 2017 | MSM  | Mapeamento Programatico E Prevalencia De HIV Entre Populates Chave Em 5 Provincias De Mo,àöSsambique: Estudo PLACE 2017 |
| PSE            | Mozambique | 2021 | MSM  | Inquerito Biologico E Comportamental Entre Homens Que Fazem Sexo Com Homens, Segunda Ronda, Mo,àöSsambique, 2020-2021   |
| ART coverage   | Mozambique | 2016 | PWID | 2014 BBS                                                                                                                |
| HIV prevalence | Mozambique | 2014 | PWID | 2014 BBS                                                                                                                |
| PSE            | Mozambique | 2014 | PWID | The Integrated Biological And Behavioral Survey Among People Who Inject Drugs, Mozambique                               |
| ART coverage   | Mozambique | 2017 | TG   | 2017 PLACE                                                                                                              |
| HIV prevalence | Mozambique | 2017 | TG   | 2017 PLACE                                                                                                              |

|                |            |      |     |                                                                                                                                              |
|----------------|------------|------|-----|----------------------------------------------------------------------------------------------------------------------------------------------|
| PSE            | Mozambique | 2017 | TG  | Mapeamento Programatico E Prevalencia De HIV Entre Populates Chave Em 5 Provincias De Mo,ãoSambique: Estudo PLACE 2017                       |
| ART coverage   | Namibia    | 2014 | FSW | Integrated Biological And Behavioral Surveillance Studies Among Female Sex Workers In Namibia                                                |
| HIV prevalence | Namibia    | 2013 | FSW | IBBS Report 2015                                                                                                                             |
| HIV prevalence | Namibia    | 2019 | FSW | 2019 BBS                                                                                                                                     |
| PSE            | Namibia    | 2013 | FSW | Integrated Biological And Behavioral Surveillance Studies Among Female Sex Workers In Namibia                                                |
| PSE            | Namibia    | 2014 | FSW | Integrated Biological And Behavioral Surveillance Studies Among Female Sex Workers In Namibia                                                |
| PSE            | Namibia    | 2019 | FSW | 2019 BBS                                                                                                                                     |
| ART coverage   | Namibia    | 2013 | MSM | Integrated Biological And Behavioral Surveillance Studies Among Men Who Have Sex With Men In Namibia (2014)                                  |
| HIV prevalence | Namibia    | 2012 | MSM | IBBS Report 2014                                                                                                                             |
| HIV prevalence | Namibia    | 2013 | MSM | IBBS Report 2014                                                                                                                             |
| PSE            | Namibia    | 2013 | MSM | Namibia Men',Ao,ãoN,ão-'S Health Study: Integrated Biological And Behavioral Surveillance Studies Among Men Who Have Sex With Men In Namibia |
| PSE            | Namibia    | 2019 | MSM | 2019 BBS                                                                                                                                     |
| ART coverage   | Nigeria    | 2020 | FSW | 2020 BBS                                                                                                                                     |
| HIV prevalence | Nigeria    | 2010 | FSW | HIV Integrated Biological And Behavioural Surveillance Survey (IBBSS) 2010                                                                   |
| HIV prevalence | Nigeria    | 2014 | FSW | Integrated Biological And Behavioural Surveillance Survey (IBBSS)                                                                            |
| HIV prevalence | Nigeria    | 2020 | FSW | Integrated Biological & Behavioural Surveillance Survey (IBBSS) Among Key Populations In Nigeria                                             |
| PSE            | Nigeria    | 2015 | FSW | Mapping And Characterisation Of Key Populations, 2015                                                                                        |
| PSE            | Nigeria    | 2015 | FSW | Reported By The Country Through The Garpr Process                                                                                            |
| PSE            | Nigeria    | 2019 | FSW | 2019 Nigeria Mapping                                                                                                                         |
| PSE            | Nigeria    | 2019 | FSW | Mapping And Size Estimation Of Key Populations Nigeria                                                                                       |
| ART coverage   | Nigeria    | 2020 | MSM | 2020 BBS                                                                                                                                     |
| HIV prevalence | Nigeria    | 2010 | MSM | HIV Integrated Biological And Behavioural Surveillance Survey (IBBSS) 2010                                                                   |
| HIV prevalence | Nigeria    | 2010 | MSM | Vu 2013                                                                                                                                      |
| HIV prevalence | Nigeria    | 2014 | MSM | Integrated Biological And Behavioural Surveillance Survey (IBBSS)                                                                            |
| HIV prevalence | Nigeria    | 2016 | MSM | Crowell et al                                                                                                                                |

|                |         |      |      |                                                                                                                                                   |
|----------------|---------|------|------|---------------------------------------------------------------------------------------------------------------------------------------------------|
| HIV prevalence | Nigeria | 2016 | MSM  | Leevan et al In Press                                                                                                                             |
| HIV prevalence | Nigeria | 2020 | MSM  | Integrated Biological & Behavioural Surveillance Survey (IBBSS) Among Key Populations In Nigeria                                                  |
| PSE            | Nigeria | 2015 | MSM  | Mapping And Characterisation Of Key Populations, 2015                                                                                             |
| PSE            | Nigeria | 2019 | MSM  | 2019 Nigeria Mapping                                                                                                                              |
| PSE            | Nigeria | 2019 | MSM  | Mapping And Size Estimation Of Key Populations Nigeria                                                                                            |
| ART coverage   | Nigeria | 2020 | PWID | 2020 BBS                                                                                                                                          |
| HIV prevalence | Nigeria | 2010 | PWID | HIV Integrated Biological And Behavioural Surveillance Survey (IBBSS) 2010                                                                        |
| HIV prevalence | Nigeria | 2014 | PWID | Integrated Biological And Behavioural Surveillance Survey (IBBSS)                                                                                 |
| HIV prevalence | Nigeria | 2020 | PWID | Integrated Biological & Behavioural Surveillance Survey (IBBSS) Among Key Populations In Nigeria                                                  |
| PSE            | Nigeria | 2015 | PWID | Mapping And Characterisation Of Key Populations, 2015                                                                                             |
| PSE            | Nigeria | 2019 | PWID | 2019 Nigeria Mapping                                                                                                                              |
| PSE            | Nigeria | 2019 | PWID | Mapping And Size Estimation Of Key Populations Nigeria                                                                                            |
| ART coverage   | Nigeria | 2020 | TG   | 2020 BBS                                                                                                                                          |
| HIV prevalence | Nigeria | 2016 | TG   | Leevan et al In Press                                                                                                                             |
| HIV prevalence | Nigeria | 2020 | TG   | Integrated Biological & Behavioural Surveillance Survey (IBBSS) Among Key Populations In Nigeria                                                  |
| ART coverage   | Rwanda  | 2015 | FSW  | Biological & Behavioral Surveillance Among Female Sexual Workers In Rwanda In 2015                                                                |
| HIV prevalence | Rwanda  | 2010 | FSW  | BBSS (2010)                                                                                                                                       |
| HIV prevalence | Rwanda  | 2015 | FSW  | Biological & Behavioral Surveillance Among Female Sexual Workers In Rwanda In 2015                                                                |
| PSE            | Rwanda  | 2010 | FSW  | Mutagoma M, et al. Int J Std&AIDS 2015, Vol 26 (11) 810-814                                                                                       |
| PSE            | Rwanda  | 2018 | FSW  | Female Sex Workers Population Size Estimation, Rwanda 2018                                                                                        |
| ART coverage   | Rwanda  | 2018 | MSM  | Behavioral And Biological Assessment And Population Size Estimation For Men Who Have Sex With Men (MSM) In Kigali, Rwanda, 2018                   |
| HIV prevalence | Rwanda  | 2018 | MSM  | HIV Infection And Engagement In HIV Care Cascade Among Men Who Have Sex With Men And Transgender Women In Kigali, Rwanda: A Cross-Sectional Study |
| PSE            | Rwanda  | 2018 | MSM  | Behavioral And Biological Assessment And Population Size Estimation For Men Who Have Sex With Men (MSM) In Kigali, Rwanda, 2018                   |
| PSE            | Rwanda  | 2018 | MSM  | Behavioral And Biological Assessment And Population Size Estimation For Men Who Have Sex With Men (MSM) In Kigali, Rwanda, 2019                   |
| PSE            | Rwanda  | 2018 | MSM  | Behavioral And Biological Assessment And Population Size Estimation For Men Who Have Sex With Men (MSM) In Kigali, Rwanda, 2020                   |

|                |              |      |      |                                                                                                                                                   |
|----------------|--------------|------|------|---------------------------------------------------------------------------------------------------------------------------------------------------|
| PSE            | Rwanda       | 2018 | MSM  | Behavioral And Biological Assessment And Population Size Estimation For Men Who Have Sex With Men (MSM) In Kigali, Rwanda, 2021                   |
| HIV prevalence | Rwanda       | 2020 | PWID | Twahirwa Rwema et al; Injection Drug Use Practices And HIV Infection Among People Who Inject Drugs In Kigali, Rwanda: A Cross-Sectional Study     |
| HIV prevalence | Rwanda       | 2018 | TG   | HIV Infection And Engagement In HIV Care Cascade Among Men Who Have Sex With Men And Transgender Women In Kigali, Rwanda: A Cross-Sectional Study |
| ART coverage   | Senegal      | 2017 | FSW  | Achieving An AIDS-Free Generation In Senegal                                                                                                      |
| ART coverage   | Senegal      | 2019 | FSW  | Enquete Nationale De Surveillance Combinee Des IST Et Du VIH/Sida (Ensc 2019)                                                                     |
| HIV prevalence | Senegal      | 2015 | FSW  | Enque_te Nationale De Surveillance Combinee Des IST Et Du VIH/Sida (Ensc 2015)                                                                    |
| HIV prevalence | Senegal      | 2017 | FSW  | Achieving An AIDS-Free Generation In Senegal                                                                                                      |
| HIV prevalence | Senegal      | 2019 | FSW  | Enque_te Nationale De Surveillance Combinee Des IST Et Du VIH/Sida (Ensc 2019)                                                                    |
| PSE            | Senegal      | 2017 | FSW  | Achieving An AIDS-Free Generation In Senegal                                                                                                      |
| ART coverage   | Senegal      | 2017 | MSM  | Achieving An AIDS-Free Generation In Senegal                                                                                                      |
| HIV prevalence | Senegal      | 2014 | MSM  | Rapport Enquete Combinee Chez Les Hommes Ayant Des Rapports Sexuels Avec Des Hommes (HSH) Au Senegal (2014)                                       |
| HIV prevalence | Senegal      | 2015 | MSM  | Poteat 2017                                                                                                                                       |
| HIV prevalence | Senegal      | 2017 | MSM  | Achieving An AIDS-Free Generation In Senegal                                                                                                      |
| HIV prevalence | Senegal      | 2017 | MSM  | Enquete Combinee Chez Les Hommes Ayant Des Rapports Sexuels Avec Des Hommes (HSH) Au Senegal                                                      |
| PSE            | Senegal      | 2017 | MSM  | Achieving An AIDS-Free Generation In Senegal                                                                                                      |
| HIV prevalence | Senegal      | 2011 | PWID | Enquete De Prevalence Et De Pratiques A Risques D'infection A VIH, Vhb, Et Vhc Chez Les Usagers De Drogues Dans La Region De Dakar (Senegal).     |
| HIV prevalence | Senegal      | 2019 | PWID | Rapport D'estimation De La Taille Et D'enquete Bio Comportementale Chez Les Consommateurs De Drogue Injectables Au Senegal                        |
| PSE            | Senegal      | 2015 | PWID | Lepretre 2015                                                                                                                                     |
| PSE            | Senegal      | 2020 | PWID | Rapport D'estimation De La Taille Et D'enquete Bio Comportementale Chez Les Consommateurs De Drogue Injectables Au Senegal The                    |
| HIV prevalence | Senegal      | 2015 | TG   | Poteat 2017                                                                                                                                       |
| HIV prevalence | Sierra Leone | 2021 | FSW  | Bio-Behavioural Survey Field Implementation 2021                                                                                                  |
| PSE            | Sierra Leone | 2021 | FSW  | Bio-Behavioural Survey Field Implementation 2021                                                                                                  |
| HIV prevalence | Sierra Leone | 2015 | MSM  | HIV Sero - Prevalence Study For Key Populations, May 2015                                                                                         |

|                |              |      |      |                                                                                                                                                                |
|----------------|--------------|------|------|----------------------------------------------------------------------------------------------------------------------------------------------------------------|
| HIV prevalence | Sierra Leone | 2021 | MSM  | Bio-Behavioural Survey Field Implementation 2021                                                                                                               |
| PSE            | Sierra Leone | 2021 | MSM  | Bio-Behavioural Survey Field Implementation 2021                                                                                                               |
| HIV prevalence | Sierra Leone | 2015 | PWID | HIV Sero - Prevalence Study For Key Populations May 2015                                                                                                       |
| HIV prevalence | Sierra Leone | 2021 | PWID | Bio-Behavioural Survey Field Implementation 2021                                                                                                               |
| PSE            | Sierra Leone | 2021 | PWID | Bio-Behavioural Survey Field Implementation 2021                                                                                                               |
| HIV prevalence | Sierra Leone | 2015 | TG   | HIV Sero - Prevalence Study For Key Populations May 2015                                                                                                       |
| HIV prevalence | Sierra Leone | 2021 | TG   | Bio-Behavioural Survey Field Implementation 2021                                                                                                               |
| PSE            | Sierra Leone | 2021 | TG   | Bio-Behavioural Survey Field Implementation 2021                                                                                                               |
| ART coverage   | South Africa | 2018 | FSW  | Sahms li                                                                                                                                                       |
| ART coverage   | South Africa | 2019 | FSW  | Samhms 2019                                                                                                                                                    |
| HIV prevalence | South Africa | 2015 | FSW  | Engagement In The HIV Care Cascade And Predictors Of Uptake Of Antiretroviral Therapy Among Female Sex Workers In Port Elizabeth, South Africa                 |
| HIV prevalence | South Africa | 2015 | FSW  | Ucsf (2015): South Africa Health Monitoring Study (Sahms)                                                                                                      |
| HIV prevalence | South Africa | 2018 | FSW  | Sahms li                                                                                                                                                       |
| PSE            | South Africa | 2014 | FSW  | Ucsf (2015): South Africa Health Monitoring Study (Sahms)                                                                                                      |
| PSE            | South Africa | 2018 | FSW  | Sahms li                                                                                                                                                       |
| ART coverage   | South Africa | 2016 | MSM  | Hptn 075                                                                                                                                                       |
| HIV prevalence | South Africa | 2012 | MSM  | Lane et al (2014)                                                                                                                                              |
| HIV prevalence | South Africa | 2012 | MSM  | Marang Men's Study (2014)                                                                                                                                      |
| HIV prevalence | South Africa | 2016 | MSM  | Hptn 075                                                                                                                                                       |
| HIV prevalence | South Africa | 2016 | MSM  | Sullivan et al                                                                                                                                                 |
| HIV prevalence | South Africa | 2017 | MSM  | Fearon et al                                                                                                                                                   |
| HIV prevalence | South Africa | 2017 | MSM  | Jobson et al                                                                                                                                                   |
| HIV prevalence | South Africa | 2019 | MSM  | Samhms li                                                                                                                                                      |
| ART coverage   | South Africa | 2017 | PWID | Tipval 2017                                                                                                                                                    |
| HIV prevalence | South Africa | 2013 | PWID | Scheibe et al (2016)                                                                                                                                           |
| HIV prevalence | South Africa | 2017 | PWID | Scheibe et al (2019)                                                                                                                                           |
| HIV prevalence | South Africa | 2017 | PWID | Scheibe et al. Understanding Hepatitis B, Hepatitis C And HIV Among People Who Inject Drugs In South Africa: Findings From A Three-City Cross-Sectional Survey |

|                |              |      |      |                                                                                                               |
|----------------|--------------|------|------|---------------------------------------------------------------------------------------------------------------|
| HIV prevalence | South Africa | 2017 | PWID | Tipval 2017 BBS                                                                                               |
| PSE            | South Africa | 2017 | PWID | Tipval 2017 BBS                                                                                               |
| ART coverage   | South Africa | 2016 | TG   | Hptn 075                                                                                                      |
| ART coverage   | South Africa | 2019 | TG   | Cloete et al 2021                                                                                             |
| HIV prevalence | South Africa | 2016 | TG   | Hptn 075                                                                                                      |
| HIV prevalence | South Africa | 2016 | TG   | Sullivan et al                                                                                                |
| HIV prevalence | South Africa | 2017 | TG   | Fearon et al                                                                                                  |
| HIV prevalence | South Africa | 2017 | TG   | Jobson et al                                                                                                  |
| ART coverage   | South Sudan  | 2016 | FSW  | A Bio-Behavioral HIV Survey Of Female Sex Workers In South Sudan                                              |
| ART coverage   | South Sudan  | 2017 | FSW  | A Bio-Behavioral HIV Survey Of Female Sex Workers In Nimule South Sudan                                       |
| ART coverage   | South Sudan  | 2019 | FSW  | Bio-Behaviour Survey Among Female Sex Workers In Wau, South Sudan Eagle 11 Survey, 2019                       |
| ART coverage   | South Sudan  | 2019 | FSW  | Bio-Behaviour Survey Among Female Sex Workers In Yambio, South Sudan Eagle 11 Survey, 2019                    |
| HIV prevalence | South Sudan  | 2016 | FSW  | Eagle Juba Report, 2016                                                                                       |
| HIV prevalence | South Sudan  | 2019 | FSW  | Bio-Behaviour Survey Among Female Sex Workers In Wau, South Sudan Eagle 11 Survey, 2019                       |
| HIV prevalence | South Sudan  | 2019 | FSW  | Bio-Behaviour Survey Among Female Sex Workers In Yambio, South Sudan Eagle 11 Survey, 2019                    |
| PSE            | South Sudan  | 2016 | FSW  | Okiria 2019                                                                                                   |
| PSE            | South Sudan  | 2019 | FSW  | Bio-Behaviour Survey Among Female Sex Workers In Wau, South Sudan Eagle 11 Survey, 2019                       |
| PSE            | South Sudan  | 2019 | FSW  | Bio-Behaviour Survey Among Female Sex Workers In Yambio, South Sudan Eagle 11 Survey, 2019                    |
| ART coverage   | Tanzania     | 2019 | FSW  | Integrated Behavioural And Biological Surveillance Survey Among Key Populations In Zanzibar, 2018-2021        |
| HIV prevalence | Tanzania     | 2011 | FSW  | Integrated Behavioral And Biological Surveillance Survey Among Key Populations At Risk In Zanzibar, 2011-2012 |
| HIV prevalence | Tanzania     | 2013 | FSW  | HIV And STI Biological And Behavioral Survey, 2013                                                            |
| HIV prevalence | Tanzania     | 2017 | FSW  | Integrated Bio-Behavioral Surveillance Survey Among Female Sex Workers In Dar-Es-Salaam, 2017                 |
| HIV prevalence | Tanzania     | 2018 | FSW  | Integrated Behavioral And Biological Surveillance Survey Among Key Populations In Zanzibar, 2018-2019         |



|                |          |      |      |                                                                                                                                                                                                              |
|----------------|----------|------|------|--------------------------------------------------------------------------------------------------------------------------------------------------------------------------------------------------------------|
| PSE            | Tanzania | 2010 | FSW  | HIV Behavioral And Biological Surveillance Survey Among Female Sex Workers In Dar Es Salaam, 2010                                                                                                            |
| PSE            | Tanzania | 2013 | FSW  | HIV And STI Biological And Behavioral Survey, 2013                                                                                                                                                           |
| PSE            | Tanzania | 2017 | FSW  | Integrated Bio-Behavioral Surveillance Survey Among Female Sex Workers In Dar Es Salaam, 2017                                                                                                                |
| PSE            | Tanzania | 2019 | FSW  | Integrated Behavioural And Biological Surveillance Survey Among Key Populations In Zanzibar, 2018-2019                                                                                                       |
| ART coverage   | Tanzania | 2019 | MSM  | Integrated Behavioural And Biological Surveillance Survey Among Key Populations In Zanzibar, 2018-2020                                                                                                       |
| HIV prevalence | Tanzania | 2011 | MSM  | Integrated Behavioral And Biological Surveillance Survey Among Key Populations At Risk In Zanzibar, 2011-2012                                                                                                |
| HIV prevalence | Tanzania | 2012 | MSM  | Prevalence Of The Human Immunodeficiency Virus, Other Sexually Transmitted Infections, And Health-Related Perceptions, Reflections, Experiences And Practices Among Men Having Sex With Men In Dar-Es-Salaam |
| HIV prevalence | Tanzania | 2013 | MSM  | Ross et al                                                                                                                                                                                                   |
| HIV prevalence | Tanzania | 2014 | MSM  | Mmbaga Ej, Moen K, Makyao N, et al. HIV And STI S Among Men Who Have Sex With Men In Dodoma Municipality, Tanzania: A Cross-Sectional Study. Sex Transm Infect 2017;93:314-319.                              |
| HIV prevalence | Tanzania | 2017 | MSM  | Integrated Bio-Behavioral Surveillance Survey Among Men Who Have Sex With Men In Dar-Es-Salaam, 2017                                                                                                         |
| HIV prevalence | Tanzania | 2018 | MSM  | Integrated Behavioral And Biological Surveillance Survey Among Key Populations In Zanzibar, 2018-2019                                                                                                        |
| PSE            | Tanzania | 2011 | MSM  | Integrated Behavioral And Biological Surveillance Survey Among Key Populations At Risk In Zanzibar, 2011-2012                                                                                                |
| PSE            | Tanzania | 2012 | MSM  | Prevalence Of The Human Immunodeficiency Virus, Other Sexually Transmitted Infections, And Health-Related Perceptions, Reflections, Experiences And Practices Among Men Having Sex With Men In Dar Es Salaam |
| PSE            | Tanzania | 2017 | MSM  | Integrated Bio-Behavioral Surveillance Survey Among Female Sex Workers In Dar Es Salaam, 2017                                                                                                                |
| PSE            | Tanzania | 2019 | MSM  | Integrated Behavioural And Biological Surveillance Survey Among Key Populations In Zanzibar, 2018-2019                                                                                                       |
| ART coverage   | Tanzania | 2016 | PWID | The Hepatitis C Cascade Of Care In People Who Inject Drugs In Dar Es Salaam, Tanzania                                                                                                                        |
| ART coverage   | Tanzania | 2019 | PWID | Integrated Behavioural And Biological Surveillance Survey Among Key Populations In Zanzibar, 2018-2019                                                                                                       |
| HIV prevalence | Tanzania | 2010 | PWID | Atkinson   Degenhardt et al., 2017                                                                                                                                                                           |
| HIV prevalence | Tanzania | 2011 | PWID | Bowring   Degenhardt et al., 2017                                                                                                                                                                            |

|                |          |      |      |                                                                                                                              |
|----------------|----------|------|------|------------------------------------------------------------------------------------------------------------------------------|
| HIV prevalence | Tanzania | 2011 | PWID | Gupta   Degenhardt et al., 2017                                                                                              |
| HIV prevalence | Tanzania | 2011 | PWID | Integrated Behavioral And Biological Surveillance Survey Among Key Populations At Risk In Zanzibar, 2011-2012                |
| HIV prevalence | Tanzania | 2013 | PWID | Integrated Bio-Behavioral Survey Among People Who Inject Drugs In Dar-Es-Salaam                                              |
| HIV prevalence | Tanzania | 2013 | PWID | Lambdin   Degenhardt et al., 2017                                                                                            |
| HIV prevalence | Tanzania | 2016 | PWID | Mohamed et al.                                                                                                               |
| HIV prevalence | Tanzania | 2017 | PWID | Integrated Bio-Behavioral Surveillance Survey Among Men Who Have Sex With Men In Dar-Es-Salaam, 2017                         |
| HIV prevalence | Tanzania | 2017 | PWID | Kawambwa et al., 2020                                                                                                        |
| HIV prevalence | Tanzania | 2017 | PWID | Leyna et al.                                                                                                                 |
| HIV prevalence | Tanzania | 2018 | PWID | Integrated Behavioral And Biological Surveillance Survey Among Key Populations In Zanzibar, 2018-2019                        |
| PSE            | Tanzania | 2011 | PWID | Integrated Behavioral And Biological Surveillance Survey Among Key Populations At Risk In Zanzibar, 2011-2012                |
| PSE            | Tanzania | 2014 | PWID | Integrated Bio-Behavioral Survey Among People Who Inject Drugs In Dar Es Salaam                                              |
| PSE            | Tanzania | 2014 | PWID | Mapping Of People Who Use Drugs And People Who Inject Drugs In Selected Regions Of Tanzania                                  |
| PSE            | Tanzania | 2017 | PWID | Integrated Bio-Behavioral Surveillance Survey Among Female Sex Workers In Dar Es Salaam, 2017                                |
| PSE            | Tanzania | 2019 | PWID | Integrated Behavioural And Biological Surveillance Survey Among Key Populations In Zanzibar, 2018-2019                       |
| HIV prevalence | Togo     | 2011 | FSW  | Enquete Comportementale Et De Seroprevalence Du VIH Chez Les Professionnels De Sexe Et Leurs Clients Au Togo En 2011         |
| HIV prevalence | Togo     | 2014 | FSW  | Examining Risk Factors For HIV And Access To Services Among Female Sex Workers And Men Who Have Sex With Men In Togo         |
| HIV prevalence | Togo     | 2015 | FSW  | 2015 Rapport_etude Ssg_ps Et Clients Au Togo_2015_30_09_ok(1).Pdf                                                            |
| HIV prevalence | Togo     | 2015 | FSW  | ,àAtude De Ssg Chez Les PS En 2015                                                                                           |
| HIV prevalence | Togo     | 2017 | FSW  | Enque_te Sero-Comportementale De Deuxieme Generation Chez Les Professionnelles Du Sexe Et Leurs Clients Au Togo En 2017 O-En |
| HIV prevalence | Togo     | 2011 | MSM  | 2011 Togo 2011 Report On Behavioural Study And HIV Prevalence Among MSM.pdf                                                  |
| HIV prevalence | Togo     | 2013 | MSM  | Poteat 2017                                                                                                                  |

|                |        |      |      |                                                                                                                                                      |
|----------------|--------|------|------|------------------------------------------------------------------------------------------------------------------------------------------------------|
| HIV prevalence | Togo   | 2013 | MSM  | Stahlman et al                                                                                                                                       |
| HIV prevalence | Togo   | 2013 | MSM  | Stahlman et al. 2016                                                                                                                                 |
| HIV prevalence | Togo   | 2014 | MSM  | Examining Risk Factors For HIV And Access To Services Among Female Sex Workers And Men Who Have Sex With Men In Togo                                 |
| HIV prevalence | Togo   | 2015 | MSM  | 2015 Rapport_etude Ssg Hsh_13 Juin 2015_30_09_0k(1).Pdf                                                                                              |
| HIV prevalence | Togo   | 2017 | MSM  | Enquete Sero-Comportementale De Deuxieme Generation Chez Les Hommes Ayant Des Rapports Sexuels Avec D'autres Hommes Au Togo En 2017                  |
| HIV prevalence | Togo   | 2011 | PWID | Enquete Comportementale Et De Seroprevalence Du VIH Chez Les Utilisateurs De Drogues Au Togo En 2011                                                 |
| HIV prevalence | Togo   | 2017 | PWID | Enque_te Sero-Comportementale De Deuxieme Generation Chez Les Usagers De Drogues Au Togo En 2017 011-                                                |
| HIV prevalence | Togo   | 2013 | TG   | Poteat 2017                                                                                                                                          |
| HIV prevalence | Togo   | 2013 | TG   | Stahlman et al                                                                                                                                       |
| HIV prevalence | Togo   | 2013 | TG   | Stahlman et al. 2016                                                                                                                                 |
| ART coverage   | Uganda | 2012 | FSW  | Doshi 2018                                                                                                                                           |
| ART coverage   | Uganda | 2021 | FSW  | Crane lii                                                                                                                                            |
| HIV prevalence | Uganda | 2012 | FSW  | Doshi 2018                                                                                                                                           |
| HIV prevalence | Uganda | 2013 | FSW  | 2014 PLACE                                                                                                                                           |
| HIV prevalence | Uganda | 2021 | FSW  | Crane lii                                                                                                                                            |
| PSE            | Uganda | 2017 | FSW  | Crane Survey Report: Population Size Estimation Among Female Sex Workers, People Who Inject Drugs, Men Who Have Sex With Men In 12 Locations, Uganda |
| PSE            | Uganda | 2018 | FSW  | Consultant Report: Size Estimation Of Key Populations In Uganda (January 10, 2018)                                                                   |
| PSE            | Uganda | 2020 | FSW  | Estimating The Size Of Key Populations In Kampala, Uganda: 3-Source Capture-Recapture Study                                                          |
| PSE            | Uganda | 2021 | FSW  | Crane lii                                                                                                                                            |
| HIV prevalence | Uganda | 2013 | MSM  | Hladik 2017                                                                                                                                          |
| PSE            | Uganda | 2017 | MSM  | Crane Survey Report: Population Size Estimation Among Female Sex Workers, People Who Inject Drugs, Men Who Have Sex With Men In 12 Locations, Uganda |
| PSE            | Uganda | 2018 | MSM  | Consultant Report: Size Estimation Of Key Populations In Uganda (January 10, 2018)                                                                   |

|                |          |      |      |                                                                                                                                                      |
|----------------|----------|------|------|------------------------------------------------------------------------------------------------------------------------------------------------------|
| PSE            | Uganda   | 2020 | MSM  | Estimating The Size Of Key Populations In Kampala, Uganda: 3-Source Capture-Recapture Study                                                          |
| HIV prevalence | Uganda   | 2019 | PWID | Platt et al.                                                                                                                                         |
| PSE            | Uganda   | 2017 | PWID | Crane Survey Report: Population Size Estimation Among Female Sex Workers, People Who Inject Drugs, Men Who Have Sex With Men In 12 Locations, Uganda |
| PSE            | Uganda   | 2018 | PWID | Consultant Report: Size Estimation Of Key Populations In Uganda (January 10, 2018)                                                                   |
| PSE            | Uganda   | 2020 | PWID | Estimating The Size Of Key Populations In Kampala, Uganda: 3-Source Capture-Recapture Study                                                          |
| HIV prevalence | Uganda   | 2012 | TG   | Crane Survey Data                                                                                                                                    |
| ART coverage   | Zambia   | 2017 | FSW  | 2016-2017 Integrated Biological And Behavioural Survey Among Female Sex Workers In Zambia                                                            |
| HIV prevalence | Zambia   | 2015 | FSW  | Integrated Biological And Behavioural Surveillance Survey Among Female Sex Workers In Zambia                                                         |
| HIV prevalence | Zambia   | 2017 | FSW  | 2017 IBBS                                                                                                                                            |
| PSE            | Zambia   | 2015 | FSW  | Mapping And Size Estimates Of Female Sex Workers Populations In The Ten Corridors Of Hope Iii Project Districts In Zambia                            |
| PSE            | Zambia   | 2017 | FSW  | 2016-17 Integrated Biological And Behavioral Survey Among Female Sex Workers In Zambia                                                               |
| PSE            | Zambia   | 2021 | MSM  | 2021 BBS                                                                                                                                             |
| ART coverage   | Zimbabwe | 2013 | FSW  | Cowan 2018                                                                                                                                           |
| ART coverage   | Zimbabwe | 2016 | FSW  | Cowan 2018                                                                                                                                           |
| HIV prevalence | Zimbabwe | 2011 | FSW  | Cowan 2013                                                                                                                                           |
| HIV prevalence | Zimbabwe | 2013 | FSW  | Chabata 2019                                                                                                                                         |
| HIV prevalence | Zimbabwe | 2013 | FSW  | Cowan 2017                                                                                                                                           |
| HIV prevalence | Zimbabwe | 2013 | FSW  | Cowan 2018                                                                                                                                           |
| HIV prevalence | Zimbabwe | 2015 | FSW  | Ndori-Mharadze 2018                                                                                                                                  |
| HIV prevalence | Zimbabwe | 2016 | FSW  | Chabata 2019                                                                                                                                         |
| HIV prevalence | Zimbabwe | 2016 | FSW  | Cowan 2018                                                                                                                                           |
| HIV prevalence | Zimbabwe | 2017 | FSW  | Hensen 2019                                                                                                                                          |
| PSE            | Zimbabwe | 2015 | FSW  | Fearon et al.                                                                                                                                        |
| PSE            | Zimbabwe | 2016 | FSW  | Fearon et al.                                                                                                                                        |

|                |          |      |     |               |
|----------------|----------|------|-----|---------------|
| PSE            | Zimbabwe | 2017 | FSW | Fearon et al. |
| ART coverage   | Zimbabwe | 2019 | MSM | IBBS 2019     |
| HIV prevalence | Zimbabwe | 2019 | MSM | IBBS 2019     |
| PSE            | Zimbabwe | 2019 | MSM | IBBS 2019     |
| ART coverage   | Zimbabwe | 2019 | TG  | IBBS 2019     |
| HIV prevalence | Zimbabwe | 2019 | TG  | IBBS 2019     |
| PSE            | Zimbabwe | 2019 | TG  | IBBS 2019     |

4





| Region | Country         | Population size |      |      |      | HIV prevalence |      |      |      | ART coverage |      |      |      |
|--------|-----------------|-----------------|------|------|------|----------------|------|------|------|--------------|------|------|------|
|        |                 | FSW             | MSM  | PWID | TGW  | FSW            | MSM  | PWID | TGW  | FSW          | MSM  | PWID | TGW  |
| ESA    | Angola          | 2017            | 2017 |      | 2017 | 2017           | 2017 |      |      | 2017         | 2017 |      | 2017 |
| ESA    | Botswana        | 2012            | 2017 |      |      | 2017           | 2017 |      | 2017 | 2017         | 2017 |      |      |
| ESA    | Burundi         | 2021            | 2021 | 2021 |      | 2021           | 2021 | 2021 |      |              |      |      |      |
| ESA    | Eswatini        | 2020            | 2020 |      |      | 2020           | 2020 |      | 2020 | 2020         | 2020 |      | 2020 |
| ESA    | Ethiopia        | 2020            |      | 2019 |      | 2020           |      | 2019 |      |              |      |      |      |
| ESA    | Kenya           | 2020            | 2020 | 2020 | 2018 | 2011           | 2017 | 2018 | 2017 | 2017         | 2017 | 2017 | 2017 |
| ESA    | Lesotho         | 2014            | 2014 |      |      | 2019           | 2019 |      | 2014 |              |      |      |      |
| ESA    | Malawi          | 2019            | 2019 |      | 2021 | 2020           | 2020 |      | 2021 | 2020         | 2020 |      | 2016 |
| ESA    | Mozambique      | 2021            | 2021 | 2014 | 2017 | 2021           | 2021 | 2014 | 2017 | 2017         | 2017 | 2016 | 2017 |
| ESA    | Namibia         | 2019            | 2019 |      |      | 2019           | 2013 |      |      | 2014         | 2013 |      |      |
| ESA    | Rwanda          | 2018            | 2018 |      |      | 2015           | 2018 | 2020 | 2018 | 2015         | 2018 |      |      |
| ESA    | South Africa    | 2018            |      | 2017 |      | 2018           | 2019 | 2017 | 2017 | 2019         | 2016 | 2017 | 2019 |
| ESA    | South Sudan     | 2019            |      |      |      | 2019           |      |      |      | 2019         |      |      |      |
| ESA    | Tanzania        | 2019            | 2019 | 2019 |      | 2018           | 2018 | 2018 |      | 2019         | 2019 | 2019 |      |
| ESA    | Uganda          | 2021            | 2020 | 2020 |      | 2021           | 2013 | 2019 | 2012 | 2021         |      |      |      |
| ESA    | Zambia          | 2017            | 2021 |      |      | 2017           |      |      |      | 2017         |      |      |      |
| ESA    | Zimbabwe        | 2017            | 2019 |      | 2019 | 2017           | 2019 |      | 2019 | 2016         | 2019 |      | 2019 |
| WCA    | Benin           |                 |      |      | 2020 | 2017           | 2017 | 2017 | 2020 |              |      |      |      |
| WCA    | Burkina Faso    | 2017            |      |      |      | 2017           | 2017 | 2017 | 2016 |              |      |      |      |
| WCA    | Cameroon        | 2018            | 2018 | 2018 |      | 2016           | 2016 |      |      | 2016         | 2016 |      |      |
| WCA    | Cent. Af. Rep   | 2019            | 2019 |      |      |                |      |      |      |              |      |      |      |
| WCA    | Chad            |                 |      |      |      |                |      |      |      |              |      |      |      |
| WCA    | Congo           | 2017            | 2017 | 2017 |      | 2012           | 2012 |      |      |              |      |      |      |
| WCA    | Dem. Rep. Congo | 2013            | 2013 | 2013 |      | 2019           | 2019 | 2019 | 2016 | 2019         | 2019 | 2019 | 2016 |
| WCA    | Côte d'Ivoire   | 2020            | 2020 | 2020 | 2020 | 2020           | 2019 | 2019 | 2019 | 2020         |      |      |      |
| WCA    | Eq. Guinea      |                 |      |      |      | 2021           | 2021 |      |      |              |      |      |      |
| WCA    | Gabon           |                 |      |      |      |                |      |      |      |              |      |      |      |
| WCA    | Gambia          | 2018            | 2018 |      |      | 2017           | 2017 |      | 2011 | 2017         | 2017 |      |      |
| WCA    | Ghana           | 2020            | 2017 |      |      | 2019           | 2017 | 2018 |      |              |      |      |      |
| WCA    | Guinea          | 2017            | 2017 |      |      | 2017           | 2017 |      |      |              |      |      |      |
| WCA    | Guinea-Bissau   |                 | 2017 |      |      | 2017           | 2017 |      |      |              |      |      |      |
| WCA    | Liberia         |                 |      |      |      |                |      |      |      |              |      |      |      |
| WCA    | Mali            | 2019            | 2019 | 2017 | 2019 | 2019           | 2019 |      | 2019 |              | 2019 |      | 2019 |
| WCA    | Niger           |                 |      |      |      |                |      |      |      |              |      |      |      |
| WCA    | Nigeria         | 2019            | 2019 | 2019 |      | 2020           | 2020 | 2020 | 2020 | 2020         | 2020 | 2020 | 2020 |
| WCA    | Senegal         | 2017            | 2017 | 2020 |      | 2019           | 2017 | 2019 | 2015 | 2019         | 2017 |      |      |
| WCA    | Sierra Leone    | 2021            | 2021 | 2021 | 2021 | 2021           | 2021 | 2021 | 2021 |              |      |      |      |
| WCA    | Togo            |                 |      |      |      | 2017           | 2017 | 2017 | 2013 |              |      |      |      |

7

8 **Supplementary Table S4: National availability of population size, HIV prevalence, and ART**  
9 **coverage data by key population.** Cells are coloured by year with most recent in green, and oldest  
0 in red.



| KP      | Parameter                                  | Log odds ratio (95%CI)  |
|---------|--------------------------------------------|-------------------------|
| FSW     | Intercept                                  | 0.246 (-0.231, 0.709)   |
|         | Logit total population prevalence          | 0.342 (0.187, 0.496)    |
|         | Region: ESA                                | 0 (Reference)           |
|         | WCA                                        | -1.28 (-2.064, -0.506)  |
|         | Method: Laboratory confirmed               | 0 (Reference)           |
|         | Self-report                                | -0.259 (-0.789, 0.286)  |
|         | Logit total population prevalence x Region | -0.144 (-0.344, 0.056)  |
| PWID    | Intercept                                  | 0.84 (-0.228, 1.97)     |
|         | Logit total population prevalence          | 0.981 (0.596, 1.382)    |
|         | Region: ESA                                | 0 (Reference)           |
|         | WCA                                        | -2.632 (-4.26, -1.063)  |
|         | Method: Laboratory confirmed               | 0 (Reference)           |
|         | Self-report                                | 1.675 (0.797, 2.595)    |
|         | Logit total population prevalence x Region | -0.703 (-1.165, -0.254) |
| MSM-TGW | Intercept                                  | -0.844 (-1.54, -0.168)  |
|         | Logit total population prevalence          | 0.357 (0.116, 0.602)    |
|         | Region: ESA                                | 0 (Reference)           |
|         | WCA                                        | -0.375 (-1.396, 0.658)  |
|         | Method: Laboratory confirmed               | 0 (Reference)           |
|         | Self-report                                | 0.403 (-0.269, 1.066)   |
|         | Population: MSM                            | 0 (Reference)           |
|         | TGW                                        | 0.283 (0.065, 0.499)    |
|         | Logit total population prevalence x Region | -0.217 (-0.508, 0.072)  |

1

2 **Supplementary Table S5: HIV prevalence model regression results.** FSW and PWID were  
3 modelled separately, and MSM-TGW were modelled together.

| KP   | Parameter                           | Without study method fixed effect | With study method fixed effect |
|------|-------------------------------------|-----------------------------------|--------------------------------|
|      |                                     | Log odds ratio (95%CI)            | Log odds ratio (95%CI)         |
| FSW  | Intercept                           | -0.01 (-0.325, 0.299)             | -0.329 (-0.774, 0.106)         |
|      | Logit total population ART coverage | 0.61 (0.402, 0.829)               | 0.616 (0.414, 0.825)           |
|      | Method: Laboratory confirmed        |                                   | 0 (Reference)                  |
|      | Self-report                         |                                   | 0.522 (0.003, 1.051)           |
| MSM  | Intercept                           | -0.444 (-0.801, -0.085)           | -0.968 (-1.568, -0.378)        |
|      | Logit total population ART coverage | 0.658 (0.319, 1.002)              | 0.699 (0.361, 1.041)           |
|      | Method: Laboratory confirmed        |                                   | 0 (Reference)                  |
|      | Self-report                         |                                   | 0.768 (0.067, 1.479)           |
| PWID | Intercept                           | -0.366 (-1.008, 0.254)            | -0.702 (-1.81, 0.386)          |
|      | Logit total population ART coverage | 0.544 (0.203, 0.893)              | 0.22 (-0.441, 0.888)           |
|      | Method: Laboratory confirmed        |                                   | 0 (Reference)                  |
|      | Self-report                         |                                   | 0.797 (-0.457, 2.021)          |

4

5 **Supplementary Table S6: ART coverage model regression results.**

6 **Supplementary Table S7: Country-specific urban KPSE proportions (%)**

| Region   | Country                      | KPSE proportion (%) (95%CI) |                |                |
|----------|------------------------------|-----------------------------|----------------|----------------|
|          |                              | FSW                         | MSM            | PWID           |
| ESA      | Angola                       | 1.6 (0.7, 3.7)              | 0.7 (0.3, 1.9) | 0.1 (0, 0.9)   |
|          | Botswana                     | 1.8 (0.6, 5.3)              | 0.7 (0.3, 2)   | 0.1 (0, 1.0)   |
|          | Burundi                      | 2.5 (0.9, 6.6)              | 1.0 (0.3, 3.5) | 0.3 (0.1, 1.0) |
|          | Eswatini                     | 2.7 (0.7, 10.9)             | 1.1 (0.3, 4.2) | 0.1 (0, 1.5)   |
|          | Ethiopia                     | 0.7 (0.4, 1.5)              | 0.2 (0, 3.8)   | 0.1 (0, 0.9)   |
|          | Kenya                        | 0.8 (0.4, 1.7)              | 0.2 (0.1, 0.5) | 0.1 (0.1, 0.3) |
|          | Lesotho                      | 0.5 (0.1, 2.6)              | 0.6 (0.1, 3.7) | 0.1 (0, 3.9)   |
|          | Malawi                       | 2.8 (1.5, 4.9)              | 1.2 (0.5, 2.9) | 0.2 (0, 1.3)   |
|          | Mozambique                   | 1.5 (0.8, 2.8)              | 1.1 (0.5, 2.3) | 0.2 (0.1, 0.6) |
|          | Namibia                      | 1.9 (0.8, 4.1)              | 1.2 (0.5, 3.2) | 0.1 (0, 0.9)   |
|          | Rwanda                       | 1.1 (0.3, 3.7)              | 1.0 (0.4, 2.5) | 0.2 (0, 1.5)   |
|          | South Africa                 | 0.7 (0.3, 1.6)              | 0.9 (0.2, 3.0) | 0.1 (0, 0.4)   |
|          | South Sudan                  | 3.7 (1.3, 10.7)             | 0.6 (0.1, 6.0) | 0.2 (0, 2.7)   |
|          | Tanzania                     | 1.2 (0.6, 2.4)              | 0.8 (0.4, 1.7) | 0.2 (0.1, 0.4) |
|          | Uganda                       | 1.3 (0.7, 2.6)              | 1.0 (0.5, 2.0) | 0.4 (0.1, 1.1) |
|          | Zambia                       | 1.8 (0.9, 3.3)              | 0.9 (0.4, 2.2) | 0.1 (0, 0.7)   |
| Zimbabwe | 1.3 (0.6, 2.7)               | 0.7 (0.3, 1.7)              | 0.1 (0, 0.7)   |                |
|          | Region total                 | 1.4 (0.3, 5.8)              | 0.8 (0.1, 3.0) | 0.2 (0.0, 1.2) |
| WCA      | Benin                        | 1.2 (0.3, 6.3)              | 0.6 (0.1, 3.1) | 0.3 (0, 2.7)   |
|          | Burkina Faso                 | 1.3 (0.6, 3.6)              | 0.5 (0.1, 2.2) | 0.3 (0, 2.0)   |
|          | Cameroon                     | 1.5 (0.7, 3.1)              | 0.6 (0.2, 1.5) | 0.1 (0, 0.5)   |
|          | Central African Republic     | 2.3 (0.8, 6.7)              | 0.6 (0.2, 1.9) | 0.2 (0, 1.0)   |
|          | Chad                         | 1.6 (0.3, 7.5)              | 0.6 (0.1, 2.4) | 0.2 (0, 1.5)   |
|          | Congo                        | 3.5 (1.4, 8.3)              | 0.5 (0.2, 1.5) | 0.1 (0, 0.5)   |
|          | Democratic Republic of Congo | 2.2 (0.9, 5.8)              | 0.9 (0.3, 2.4) | 0.1 (0, 0.4)   |
|          | Côte d'Ivoire                | 0.8 (0.4, 2.0)              | 0.3 (0.1, 0.7) | 0.2 (0, 0.8)   |
|          | Equatorial Guinea            | 1.6 (0.2, 13.2)             | 0.6 (0.1, 6.3) | 0.1 (0, 1.7)   |
|          | Gabon                        | 2 (0.3, 12.6)               | 0.5 (0.1, 3.7) | 0.1 (0, 1.2)   |
|          | Gambia                       | 0.7 (0.1, 5.7)              | 0.4 (0, 4.0)   | 0.1 (0, 2.0)   |
|          | Ghana                        | 0.3 (0.2, 0.5)              | 0.6 (0.2, 1.5) | 0.2 (0, 2.7)   |
|          | Guinea                       | 0.8 (0.4, 1.8)              | 0.2 (0.1, 0.4) | 0.2 (0, 0.9)   |

|     |                          |                |                |                |
|-----|--------------------------|----------------|----------------|----------------|
|     | Guinea-Bissau            | 0.8 (0.1, 6.6) | 0.6 (0.1, 3.4) | 0.1 (0, 1.5)   |
|     | Liberia                  | 1.0 (0.2, 6.1) | 0.4 (0.1, 2.0) | 0.2 (0, 2.0)   |
|     | Mali                     | 2.0 (0.9, 4.8) | 0.8 (0.3, 1.7) | 0.3 (0.1, 1.4) |
|     | Niger                    | 1.6 (0.4, 6.4) | 0.6 (0.1, 2.5) | 0.3 (0.1, 2.0) |
|     | Nigeria                  | 1.4 (0.7, 3.0) | 0.5 (0.2, 1.1) | 0.5 (0.2, 1.2) |
|     | Senegal                  | 0.8 (0.2, 3.0) | 0.3 (0.1, 1.2) | 0.1 (0, 0.3)   |
|     | Sierra Leone             | 1.6 (0.4, 5.7) | 1.0 (0.3, 3.2) | 0.4 (0.1, 1.5) |
|     | Togo                     | 0.8 (0.1, 5.2) | 0.5 (0.1, 3.7) | 0.3 (0, 2.9)   |
|     | Region total             | 1.3 (0.2, 6.4) | 0.5 (0.1, 2.5) | 0.0 (0.2, 1.6) |
| SSA | Sub-Saharan Africa total | 1.4 (0.2, 6.1) | 0.7 (0.1, 2.7) | 0.2 (0.0, 1.4) |

7

8

9 **Supplementary Table S8: Country-specific KP HIV prevalence estimates**

| Region   | Country                    | HIV prevalence (%) (95%CI) |                          |                          |                          |
|----------|----------------------------|----------------------------|--------------------------|--------------------------|--------------------------|
|          |                            | FSW                        | MSM                      | PWID                     | TGW                      |
| ESA      | Angola                     | 12 (7, 19)                 | 4 (2, 9)                 | 6 (3, 13)                | 10 (5, 20)               |
|          | Burundi                    | 23 (13, 36)                | 3 (1, 6)                 | 7 (3, 16)                | 10 (4, 22)               |
|          | Botswana                   | 50 (40, 61)                | 43 (30, 58)              | 16 (9, 27)               | 24 (14, 38)              |
|          | Ethiopia                   | 19 (14, 26)                | 2 (1, 6)                 | 7 (2, 21)                | 11 (3, 29)               |
|          | Kenya                      | 31 (20, 43)                | 11 (6, 17)               | 13 (7, 20)               | 20 (12, 29)              |
|          | Lesotho                    | 54 (43, 64)                | 42 (29, 56)              | 28 (20, 37)              | 38 (28, 49)              |
|          | Mozambique                 | 25 (20, 32)                | 28 (20, 38)              | 11 (7, 17)               | 17 (10, 26)              |
|          | Malawi                     | 49 (40, 59)                | 19 (13, 28)              | 14 (9, 19)               | 21 (15, 29)              |
|          | Namibia                    | 33 (24, 44)                | 28 (19, 38)              | 15 (8, 27)               | 23 (12, 39)              |
|          | Rwanda                     | 42 (32, 51)                | 6 (3, 11)                | 8 (3, 17)                | 13 (6, 24)               |
|          | South Sudan                | 21 (13, 32)                | 6 (3, 12)                | 9 (3, 25)                | 14 (5, 35)               |
|          | Eswatini                   | 52 (40, 63)                | 53 (36, 69)              | 14 (9, 21)               | 23 (15, 34)              |
|          | Tanzania                   | 32 (20, 46)                | 12 (7, 19)               | 11 (4, 29)               | 17 (6, 40)               |
|          | Uganda                     | 16 (10, 25)                | 14 (9, 20)               | 12 (5, 22)               | 18 (8, 31)               |
|          | South Africa               | 59 (48, 69)                | 42 (29, 56)              | 31 (23, 40)              | 44 (33, 55)              |
|          | Zambia                     | 53 (44, 61)                | 26 (18, 36)              | 15 (5, 35)               | 23 (9, 47)               |
| Zimbabwe | 52 (44, 58)                | 28 (19, 38)                | 16 (9, 25)               | 23 (14, 35)              |                          |
|          | <b><i>Region total</i></b> | <b><i>37 (11, 62)</i></b>  | <b><i>13 (4, 34)</i></b> | <b><i>19 (2, 56)</i></b> | <b><i>20 (6, 47)</i></b> |
| WCA      | Benin                      | 16 (12, 20)                | 4 (3, 7)                 | 12 (8, 18)               | 17 (11, 24)              |
|          | Burkina Faso               | 11 (8, 15)                 | 4 (2, 6)                 | 5 (3, 9)                 | 7 (4, 12)                |
|          | Central African Republic   | 16 (6, 38)                 | 6 (3, 9)                 | 15 (5, 33)               | 19 (8, 41)               |
|          | Cote d'Ivoire              | 9 (5, 16)                  | 5 (3, 8)                 | 13 (9, 18)               | 18 (13, 25)              |
|          | Cameroon                   | 21 (13, 30)                | 6 (3, 9)                 | 17 (9, 27)               | 23 (13, 35)              |
|          | Congo - Kinshasa           | 7 (6, 10)                  | 4 (2, 6)                 | 12 (7, 20)               | 15 (9, 25)               |
|          | Congo - Brazzaville        | 11 (6, 18)                 | 6 (4, 10)                | 19 (10, 34)              | 26 (14, 45)              |
|          | Gabon                      | 17 (6, 37)                 | 6 (4, 9)                 | 14 (5, 33)               | 20 (8, 46)               |
|          | Ghana                      | 8 (6, 12)                  | 5 (3, 7)                 | 13 (8, 20)               | 17 (10, 27)              |
|          | Guinea                     | 13 (8, 20)                 | 4 (3, 7)                 | 13 (6, 25)               | 17 (8, 31)               |
|          | Gambia                     | 16 (9, 24)                 | 5 (3, 8)                 | 16 (10, 26)              | 22 (13, 34)              |
|          | Guinea-Bissau              | 19 (11, 30)                | 6 (4, 9)                 | 11 (5, 20)               | 15 (7, 27)               |
|          | Equatorial Guinea          | 54 (34, 72)                | 7 (4, 13)                | 29 (15, 53)              | 37 (19, 63)              |

|     |                            |                          |                          |                        |                          |
|-----|----------------------------|--------------------------|--------------------------|------------------------|--------------------------|
|     | Liberia                    | 13 (5, 33)               | 5 (3, 7)                 | 13 (5, 32)             | 18 (6, 39)               |
|     | Mali                       | 12 (4, 32)               | 4 (3, 7)                 | 12 (6, 23)             | 17 (8, 29)               |
|     | Niger                      | 9 (3, 27)                | 3 (2, 5)                 | 11 (4, 26)             | 14 (6, 34)               |
|     | Nigeria                    | 17 (13, 21)              | 5 (3, 7)                 | 21 (15, 29)            | 28 (20, 38)              |
|     | Senegal                    | 8 (5, 11)                | 3 (2, 5)                 | 19 (12, 28)            | 24 (16, 35)              |
|     | Sierra Leone               | 12 (7, 19)               | 5 (3, 7)                 | 7 (3, 13)              | 10 (5, 17)               |
|     | Chad                       | 12 (4, 35)               | 4 (3, 7)                 | 13 (5, 29)             | 17 (7, 36)               |
|     | Togo                       | 13 (10, 17)              | 4 (3, 7)                 | 10 (7, 14)             | 11 (7, 17)               |
|     | <b><i>Region total</i></b> | <b><i>13 (5, 53)</i></b> | <b><i>13 (5, 32)</i></b> | <b><i>5 (2, 9)</i></b> | <b><i>18 (6, 41)</i></b> |
| SSA | Sub-Saharan Africa total   | 18 (6, 60)               | 13 (4, 33)               | 6 (2, 51)              | 19 (6, 45)               |

0

1

2 **Supplementary Table S9: Country-specific KP ART coverage estimates among age 15-49 years**  
 3 **in 2021**

| Region   | Country                    | ART coverage (95%CI)      |                           |                           |
|----------|----------------------------|---------------------------|---------------------------|---------------------------|
|          |                            | FSW                       | MSM                       | PWID                      |
| ESA      | Angola                     | 48 (39, 56)               | 25 (16, 36)               | 33 (19, 51)               |
|          | Burundi                    | 89 (79, 95)               | 64 (50, 76)               | 80 (58, 92)               |
|          | Botswana                   | 84 (74, 91)               | 59 (47, 71)               | 66 (48, 81)               |
|          | Ethiopia                   | 70 (62, 77)               | 63 (49, 75)               | 60 (44, 75)               |
|          | Kenya                      | 79 (70, 86)               | 59 (47, 70)               | 65 (47, 80)               |
|          | Lesotho                    | 75 (66, 83)               | 56 (45, 67)               | 61 (44, 76)               |
|          | Mozambique                 | 66 (58, 72)               | 47 (38, 57)               | 52 (36, 67)               |
|          | Malawi                     | 77 (68, 84)               | 65 (50, 77)               | 66 (48, 81)               |
|          | Namibia                    | 80 (70, 87)               | 64 (50, 76)               | 67 (48, 82)               |
|          | Rwanda                     | 85 (75, 92)               | 76 (59, 88)               | 76 (55, 89)               |
|          | South Sudan                | 39 (30, 50)               | 22 (14, 34)               | 27 (14, 46)               |
|          | Eswatini                   | 89 (79, 95)               | 80 (62, 91)               | 85 (63, 96)               |
|          | Tanzania                   | 78 (69, 85)               | 56 (45, 68)               | 63 (45, 78)               |
|          | Uganda                     | 85 (75, 92)               | 68 (53, 81)               | 74 (54, 88)               |
|          | South Africa               | 67 (59, 74)               | 46 (37, 55)               | 52 (36, 67)               |
|          | Zambia                     | 73 (64, 80)               | 62 (48, 74)               | 61 (44, 76)               |
| Zimbabwe | 85 (75, 92)                | 76 (59, 89)               | 76 (55, 89)               |                           |
|          | <b><i>Region total</i></b> | <b><i>71 (46, 92)</i></b> | <b><i>52 (19, 82)</i></b> | <b><i>58 (28, 84)</i></b> |
| WCA      | Benin                      | 74 (65, 82)               | 44 (36, 54)               | 57 (40, 72)               |
|          | Burkina Faso               | 89 (79, 95)               | 47 (38, 57)               | 62 (45, 77)               |
|          | Central African Republic   | 61 (53, 67)               | 37 (29, 46)               | 45 (30, 61)               |
|          | Cote d'Ivoire              | 72 (63, 79)               | 46 (37, 56)               | 56 (40, 71)               |
|          | Cameroon                   | 70 (62, 77)               | 53 (43, 64)               | 58 (41, 72)               |
|          | Congo - Kinshasa           | 66 (58, 73)               | 89 (70, 97)               | 61 (44, 76)               |
|          | Congo - Brazzaville        | 39 (30, 50)               | 23 (14, 35)               | 28 (15, 47)               |
|          | Gabon                      | 55 (48, 62)               | 43 (35, 52)               | 43 (28, 58)               |
|          | Ghana                      | 63 (56, 70)               | 38 (30, 47)               | 48 (33, 63)               |
|          | Guinea                     | 55 (48, 62)               | 37 (29, 46)               | 42 (28, 57)               |
|          | Gambia                     | 47 (39, 55)               | 20 (11, 32)               | 31 (17, 49)               |
|          | Guinea-Bissau              | 66 (58, 72)               | 33 (25, 43)               | 47 (32, 62)               |

|     |                            |                           |                           |                           |
|-----|----------------------------|---------------------------|---------------------------|---------------------------|
|     | Equatorial Guinea          | 55 (48, 62)               | 21 (13, 33)               | 35 (21, 52)               |
|     | Liberia                    | 61 (54, 68)               | 31 (23, 41)               | 44 (29, 59)               |
|     | Mali                       | 59 (52, 66)               | 35 (28, 45)               | 44 (29, 59)               |
|     | Niger                      | 71 (62, 78)               | 45 (36, 54)               | 53 (38, 68)               |
|     | Nigeria                    | 89 (79, 95)               | 55 (45, 67)               | 69 (49, 83)               |
|     | Senegal                    | 84 (74, 91)               | 46 (38, 56)               | 61 (44, 75)               |
|     | Sierra Leone               | 61 (54, 68)               | 30 (22, 40)               | 43 (28, 58)               |
|     | Chad                       | 69 (60, 76)               | 49 (40, 59)               | 55 (39, 69)               |
|     | Togo                       | 72 (63, 79)               | 45 (36, 54)               | 55 (40, 70)               |
|     | <b><i>Region total</i></b> | <b><i>76 (39, 93)</i></b> | <b><i>69 (18, 96)</i></b> | <b><i>65 (25, 92)</i></b> |
| SSA | Sub-Saharan Africa total   | 73 (42, 93)               | 59 (18, 94)               | 61 (28, 90)               |

4

5



6 **Supplementary Table S10: MSM age group denominator sensitivity analysis.** HIV prevalence in  
7 MSM presented at 1 and 15% total population HIV prevalence in Eastern and Southern Africa (ESA)  
8 and at 1 and 7% total population HIV prevalence in Western and Central Africa (WCA). ART  
9 coverage in MSM presented at 40, 75, and 80% total population ART coverage in sub-Saharan Africa  
0 (SSA). KP estimates using ages 15-49 as matched total population age group for HIV prevalence and  
1 ART coverage are as in primary analysis.

| Region         | Total population estimate (%) | KP estimate (95%CI) |            |
|----------------|-------------------------------|---------------------|------------|
|                |                               | 15 to 49            | 15 to 29   |
| HIV prevalence |                               |                     |            |
| ESA            | 1                             | 8 (3-22)            | 10 (4-25)  |
|                | 15                            | 20 (8-41)           | 21 (8-43)  |
| WCA            | 1                             | 14 (6-31)           | 14 (5-31)  |
|                | 7                             | 18 (7-38)           | 14 (5-32)  |
| ART coverage   |                               |                     |            |
| SSA            | 40                            | 33 (25-43)          | 37 (29-45) |
| SSA            | 75                            | 57 (46-68)          | 62 (50-73) |
| SSA            | 80                            | 62 (49-73)          | 67 (53-78) |

2

3
